# Supplementary material for: Interrogating in vivo T-cell metabolism in mice using stable isotope labeling metabolomics and rapid cell sorting
Source: Springer Nature journal article supplement (doi:10.1038/s41596-021-00586-2), 2021-08-04
Supplement: MOESM1 [file 41596_2021_586_MOESM1_ESM20.pdf]

## Reporting Summary

Nature Research wishes to improve the reproducibility of the work that we publish. This form provides structure for consistency and transparency in reporting. For further information on Nature Research policies, see our [Editorial Policies](#) and the [Editorial Policy Checklist](#).

### Statistics

For all statistical analyses, confirm that the following items are present in the figure legend, table legend, main text, or Methods section.

n/a Confirmed

- ☐ ☒ The exact sample size ( $n$ ) for each experimental group/condition, given as a discrete number and unit of measurement
- ☐ ☒ A statement on whether measurements were taken from distinct samples or whether the same sample was measured repeatedly
- ☐ ☒ The statistical test(s) used AND whether they are one- or two-sided  
*Only common tests should be described solely by name; describe more complex techniques in the Methods section.*
- ☒ ☐ A description of all covariates tested
- ☒ ☐ A description of any assumptions or corrections, such as tests of normality and adjustment for multiple comparisons
- ☐ ☒ A full description of the statistical parameters including central tendency (e.g. means) or other basic estimates (e.g. regression coefficient) AND variation (e.g. standard deviation) or associated estimates of uncertainty (e.g. confidence intervals)
- ☒ ☐ For null hypothesis testing, the test statistic (e.g.  $F$ ,  $t$ ,  $r$ ) with confidence intervals, effect sizes, degrees of freedom and  $P$  value noted  
*Give  $P$  values as exact values whenever suitable.*
- ☒ ☐ For Bayesian analysis, information on the choice of priors and Markov chain Monte Carlo settings
- ☒ ☐ For hierarchical and complex designs, identification of the appropriate level for tests and full reporting of outcomes
- ☒ ☐ Estimates of effect sizes (e.g. Cohen's  $d$ , Pearson's  $r$ ), indicating how they were calculated

*Our web collection on [statistics for biologists](#) contains articles on many of the points above.*

### Software and code

Policy information about [availability of computer code](#)

|                 |                                                                                                                                                                                                                                                                                                                                                                    |
|-----------------|--------------------------------------------------------------------------------------------------------------------------------------------------------------------------------------------------------------------------------------------------------------------------------------------------------------------------------------------------------------------|
| Data collection | LC/MS data was collected using Thermo Scientific Xcalibur software 4.3.73.11. GC/MS data was collected with                                                                                                                                                                                                                                                        |
| Data analysis   | Peak picking analysis of raw LC/MS files was completed using EI-MAVEN (v0.12.0) and of raw GC/MS files by Agilent MassHunter Quantitative Analysis (v9.0). Natural abundance correction was completed using Polly by Elucidata ( <a href="https://elucidata.io/">https://elucidata.io/</a> ) for LC/MS data and using the web tool fluxfix.science for GC/MS data. |

For manuscripts utilizing custom algorithms or software that are central to the research but not yet described in published literature, software must be made available to editors and reviewers. We strongly encourage code deposition in a community repository (e.g. GitHub). See the Nature Research [guidelines for submitting code & software](#) for further information.

### Data

Policy information about [availability of data](#)

All manuscripts must include a [data availability statement](#). This statement should provide the following information, where applicable:

- Accession codes, unique identifiers, or web links for publicly available datasets
- A list of figures that have associated raw data
- A description of any restrictions on data availability

All data generated or analyzed during this study are included in this published article (and its supplementary information files).

## Field-specific reporting

Please select the one below that is the best fit for your research. If you are not sure, read the appropriate sections before making your selection.

☒ Life sciences ☐ Behavioural & social sciences ☐ Ecological, evolutionary & environmental sciences

For a reference copy of the document with all sections, see [nature.com/documents/nr-reporting-summary-flat.pdf](https://www.nature.com/documents/nr-reporting-summary-flat.pdf)

## Life sciences study design

All studies must disclose on these points even when the disclosure is negative.

|                 |                                                                                                                                                                  |
|-----------------|------------------------------------------------------------------------------------------------------------------------------------------------------------------|
| Sample size     | 3 C57BL/6 mice injected with saline (Ctrl) and 3 C57BL/6 mice injected with Phenformin for tail vein infusion. All mice from the same litter and of the same age |
| Data exclusions | No data was excluded                                                                                                                                             |
| Replication     | biological replicates                                                                                                                                            |
| Randomization   | N/A comparison of Phenformin treatment vs control                                                                                                                |
| Blinding        | N/A comparison of Phenformin treatment vs control                                                                                                                |

## Reporting for specific materials, systems and methods

We require information from authors about some types of materials, experimental systems and methods used in many studies. Here, indicate whether each material, system or method listed is relevant to your study. If you are not sure if a list item applies to your research, read the appropriate section before selecting a response.

### Materials & experimental systems

|                                     |                                                                 |
|-------------------------------------|-----------------------------------------------------------------|
| n/a                                 | Involved in the study                                           |
| <input type="checkbox"/>            | <input checked="" type="checkbox"/> Antibodies                  |
| <input checked="" type="checkbox"/> | <input type="checkbox"/> Eukaryotic cell lines                  |
| <input checked="" type="checkbox"/> | <input type="checkbox"/> Palaeontology and archaeology          |
| <input type="checkbox"/>            | <input checked="" type="checkbox"/> Animals and other organisms |
| <input checked="" type="checkbox"/> | <input type="checkbox"/> Human research participants            |
| <input checked="" type="checkbox"/> | <input type="checkbox"/> Clinical data                          |
| <input checked="" type="checkbox"/> | <input type="checkbox"/> Dual use research of concern           |

### Methods

|                                     |                                                    |
|-------------------------------------|----------------------------------------------------|
| n/a                                 | Involved in the study                              |
| <input checked="" type="checkbox"/> | <input type="checkbox"/> ChIP-seq                  |
| <input type="checkbox"/>            | <input checked="" type="checkbox"/> Flow cytometry |
| <input checked="" type="checkbox"/> | <input type="checkbox"/> MRI-based neuroimaging    |

## Antibodies

|                 |                                                                                                                                                                                                                                                                                                                                                                    |
|-----------------|--------------------------------------------------------------------------------------------------------------------------------------------------------------------------------------------------------------------------------------------------------------------------------------------------------------------------------------------------------------------|
| Antibodies used | Also See Table 3<br>FITC KLRG1 (ThermoFisher) 11-5893-82 2F1<br>PE CD8 1/300 (ThermoFisher) 12-0081-85 53-6.7<br>PECy7 CD44 1/300 (ThermoFisher) 25-0441-82 IM7<br>APC Thy1.1 1/300 (ThermoFisher) 17-0900-82 HIS51<br>APCCy7 Viability 1/1000 (ThermoFisher) 65-0865-14<br>BV421 CD127 1/100 (Biolegend) 135024 A7R34<br>BV605 CD4 1/300 (Biolegend) 100548 RM4-5 |
| Validation      | Validated by manufacturer                                                                                                                                                                                                                                                                                                                                          |

## Animals and other organisms

Policy information about [studies involving animals](#); [ARRIVE guidelines](#) recommended for reporting animal research

|                         |                                                             |
|-------------------------|-------------------------------------------------------------|
| Laboratory animals      | C57BL/6J Purchased from Jackson Lab, Aged 6-8 weeks Females |
| Wild animals            | NA                                                          |
| Field-collected samples | NA                                                          |
| Ethics oversight        | IACUC Approval (18-12-035)                                  |

Note that full information on the approval of the study protocol must also be provided in the manuscript.

## Flow Cytometry

### Plots

Confirm that:

- ☒ The axis labels state the marker and fluorochrome used (e.g. CD4-FITC).
- ☒ The axis scales are clearly visible. Include numbers along axes only for bottom left plot of group (a 'group' is an analysis of identical markers).
- ☒ All plots are contour plots with outliers or pseudocolor plots.
- ☒ A numerical value for number of cells or percentage (with statistics) is provided.

### Methodology

|                           |                                                                                                                |
|---------------------------|----------------------------------------------------------------------------------------------------------------|
| Sample preparation        | Mouse Splenocytes                                                                                              |
| Instrument                | Beckman Coulter CytoFLEX S (A four laser, 14-color benchtop analyzer (4 violet, 2 blue, 4 yellow-green, 3 red) |
| Software                  | FlowJo v10.7.1                                                                                                 |
| Cell population abundance | Full Gating shown in figure 5                                                                                  |
| Gating strategy           | Shown in figure 5                                                                                              |

- ☒ Tick this box to confirm that a figure exemplifying the gating strategy is provided in the Supplementary Information.
