# Supplementary material for: Interrogating in vivo T-cell metabolism in mice using stable isotope labeling metabolomics and rapid cell sorting
Source: Springer Nature journal article supplement (doi:10.1038/s41596-021-00586-2), 2021-08-04
Supplement: MOESM4 [file 41596_2021_586_MOESM4_ESM23.xlsx]

## Sheet: Raw Tracing Data
Formula	Intensity	Label	Name	Sample	Unlabeled Fragment	Indistinguishale_isotope	NA Corrected	NA Corrected with zero	Pool_total	Fractional Enrichment	Fractional Enrichment with zero
C11H15N2O8P	27949.5	PARENT	?-Nicotinamide mononucleotide	S1-00	?-Nicotinamide mononucleotide	{'C': ['P']}	31600.8	31600.8	42281.4	0.7474	0.7474
C11H15N2O8P	9774.72	C13-label-3	?-Nicotinamide mononucleotide	S1-00	?-Nicotinamide mononucleotide	{'C': ['P']}	10680.6	10680.6	42281.4	0.2526	0.2526
C7H11N3O2	39188.6	PARENT	1-methylhistidine	S1-00	1-methylhistidine	{'C': ['P']}	42373.4	42373.4	42373.4	1	1
C7H11N3O2	1512.09	C13-label-1	1-methylhistidine	S1-00	1-methylhistidine	{'C': ['P']}	-1675.59	0	42373.4	0	0
C6H11NO4	89425.2	PARENT	2-Aminoadipic acid	S1-00	2-Aminoadipic acid	{'C': ['P']}	95619.3	95619.3	95955	0.9965	0.9965
C6H11NO4	6339.97	C13-label-1	2-Aminoadipic acid	S1-00	2-Aminoadipic acid	{'C': ['P']}	335.614	335.614	95955	0.0035	0.0035
C9H13N3O4	24367.4	PARENT	2'-Deoxycytidine	S1-00	2'-Deoxycytidine	{'C': ['P']}	26942.5	26942.5	26942.5	1	1
C9H13N3O4	0	C13-label-1	2'-Deoxycytidine	S1-00	2'-Deoxycytidine	{'C': ['P']}	-2691.55	0	26942.5	0	0
C9H13N3O4	0	C13-label-5	2'-Deoxycytidine	S1-00	2'-Deoxycytidine	{'C': ['P']}	-0.000572035	0	26942.5	0	0
C4H8O3	105061	PARENT	2-Hydroxybutyric acid	S1-00	2-Hydroxybutyric acid	{'C': ['P']}	109858	109858	123593	0.8889	0.8889
C4H8O3	3819.27	C13-label-1	2-Hydroxybutyric acid	S1-00	2-Hydroxybutyric acid	{'C': ['P']}	-928.37	0	123593	0	0
C4H8O3	6310.45	C13-label-2	2-Hydroxybutyric acid	S1-00	2-Hydroxybutyric acid	{'C': ['P']}	6402.61	6402.61	123593	0.0518	0.0518
C4H8O3	432.478	C13-label-3	2-Hydroxybutyric acid	S1-00	2-Hydroxybutyric acid	{'C': ['P']}	294.937	294.937	123593	0.0024	0.0024
C4H8O3	7041.82	C13-label-4	2-Hydroxybutyric acid	S1-00	2-Hydroxybutyric acid	{'C': ['P']}	7037.76	7037.76	123593	0.0569	0.0569
C6H10O4	130012	PARENT	2-Methylglutaric acid	S1-00	2-Methylglutaric acid	{'C': ['P']}	139017	139017	140620	0.9886	0.9886
C6H10O4	0	C13-label-1	2-Methylglutaric acid	S1-00	2-Methylglutaric acid	{'C': ['P']}	-9258.54	0	140620	0	0
C6H10O4	1287.13	C13-label-2	2-Methylglutaric acid	S1-00	2-Methylglutaric acid	{'C': ['P']}	1602.82	1602.82	140620	0.0114	0.0114
C6H10O4	0	C13-label-5	2-Methylglutaric acid	S1-00	2-Methylglutaric acid	{'C': ['P']}	-0.00750331	0	140620	0	0
C5H6O5	450375	PARENT	2-oxoglutarate	S1-00	2-oxoglutarate	{'C': ['P']}	476225	476225	686348	0.6939	0.6939
C5H6O5	103909	C13-label-1	2-oxoglutarate	S1-00	2-oxoglutarate	{'C': ['P']}	82222.9	82222.9	686348	0.1198	0.1198
C5H6O5	88518	C13-label-2	2-oxoglutarate	S1-00	2-oxoglutarate	{'C': ['P']}	87294.9	87294.9	686348	0.1272	0.1272
C5H6O5	32851.9	C13-label-3	2-oxoglutarate	S1-00	2-oxoglutarate	{'C': ['P']}	30619.3	30619.3	686348	0.0446	0.0446
C5H6O5	8889.02	C13-label-4	2-oxoglutarate	S1-00	2-oxoglutarate	{'C': ['P']}	8276.3	8276.3	686348	0.0121	0.0121
C5H6O5	1805.94	C13-label-5	2-oxoglutarate	S1-00	2-oxoglutarate	{'C': ['P']}	1710.18	1710.18	686348	0.0025	0.0025
C6H10O5	291400	PARENT	3-Hydroxy-3-methylglutaric acid	S1-00	3-Hydroxy-3-methylglutaric acid	{'C': ['P']}	311584	311584	371454	0.8388	0.8388
C6H10O5	20289.8	C13-label-1	3-Hydroxy-3-methylglutaric acid	S1-00	3-Hydroxy-3-methylglutaric acid	{'C': ['P']}	702.825	702.825	371454	0.0019	0.0019
C6H10O5	42145	C13-label-2	3-Hydroxy-3-methylglutaric acid	S1-00	3-Hydroxy-3-methylglutaric acid	{'C': ['P']}	43454.5	43454.5	371454	0.117	0.117
C6H10O5	6106.63	C13-label-3	3-Hydroxy-3-methylglutaric acid	S1-00	3-Hydroxy-3-methylglutaric acid	{'C': ['P']}	4375.81	4375.81	371454	0.0118	0.0118
C6H10O5	10199.1	C13-label-4	3-Hydroxy-3-methylglutaric acid	S1-00	3-Hydroxy-3-methylglutaric acid	{'C': ['P']}	10251.5	10251.5	371454	0.0276	0.0276
C6H10O5	0	C13-label-5	3-Hydroxy-3-methylglutaric acid	S1-00	3-Hydroxy-3-methylglutaric acid	{'C': ['P']}	-229.438	0	371454	0	0
C6H10O5	1083.24	C13-label-6	3-Hydroxy-3-methylglutaric acid	S1-00	3-Hydroxy-3-methylglutaric acid	{'C': ['P']}	1084.52	1084.52	371454	0.0029	0.0029
C4H8O3	789461	PARENT	3-Hydroxybutyric acid	S1-00	3-Hydroxybutyric acid	{'C': ['P']}	825508	825508	825789	0.9997	0.9997
C4H8O3	26601.4	C13-label-1	3-Hydroxybutyric acid	S1-00	3-Hydroxybutyric acid	{'C': ['P']}	-9145.29	0	825789	0	0
C4H8O3	573.37	C13-label-2	3-Hydroxybutyric acid	S1-00	3-Hydroxybutyric acid	{'C': ['P']}	280.587	280.587	825789	0.0003	0.0003
C7H11N3O2	447774	PARENT	3-Methyl-L-histidine	S1-00	3-Methyl-L-histidine	{'C': ['P']}	484163	484163	484163	1	1
C7H11N3O2	18780.4	C13-label-1	3-Methyl-L-histidine	S1-00	3-Methyl-L-histidine	{'C': ['P']}	-17538.2	0	484163	0	0
C7H11N3O2	0	C13-label-2	3-Methyl-L-histidine	S1-00	3-Methyl-L-histidine	{'C': ['P']}	-84.6828	0	484163	0	0
C3H7O7P	192800	PARENT	3-Phosphoglyceric acid	S1-00	3-Phosphoglyceric acid	{'C': ['P']}	199365	199365	220441	0.9044	0.9044
C3H7O7P	8570.47	C13-label-1	3-Phosphoglyceric acid	S1-00	3-Phosphoglyceric acid	{'C': ['P']}	2125.09	2125.09	220441	0.0096	0.0096
C3H7O7P	2464.42	C13-label-2	3-Phosphoglyceric acid	S1-00	3-Phosphoglyceric acid	{'C': ['P']}	2371.22	2371.22	220441	0.0108	0.0108
C3H7O7P	16605.9	C13-label-3	3-Phosphoglyceric acid	S1-00	3-Phosphoglyceric acid	{'C': ['P']}	16579.1	16579.1	220441	0.0752	0.0752
C4H8N2O3	157629	PARENT	3-Ureidopropionic acid	S1-00	3-Ureidopropionic acid	{'C': ['P']}	164826	164826	164826	1	1
C4H8N2O3	3711.2	C13-label-1	3-Ureidopropionic acid	S1-00	3-Ureidopropionic acid	{'C': ['P']}	-3480.71	0	164826	0	0
C4H8O3	21755.8	PARENT	4-Hydroxybutyric acid (GHB)	S1-00	4-Hydroxybutyric acid (GHB)	{'C': ['P']}	22749.1	22749.1	24845.9	0.9156	0.9156
C4H8O3	0	C13-label-1	4-Hydroxybutyric acid (GHB)	S1-00	4-Hydroxybutyric acid (GHB)	{'C': ['P']}	-1010.06	0	24845.9	0	0
C4H8O3	2034.01	C13-label-2	4-Hydroxybutyric acid (GHB)	S1-00	4-Hydroxybutyric acid (GHB)	{'C': ['P']}	2096.75	2096.75	24845.9	0.0844	0.0844
C5H9NO3	777552	PARENT	4-hydroxy-proline	S1-00	4-hydroxy-proline	{'C': ['P']}	822182	822182	822182	1	1
C5H9NO3	34543.5	C13-label-1	4-hydroxy-proline	S1-00	4-hydroxy-proline	{'C': ['P']}	-9510.32	0	822182	0	0
C5H9NO3	0	C13-label-2	4-hydroxy-proline	S1-00	4-hydroxy-proline	{'C': ['P']}	-590.752	0	822182	0	0
C5H13O14P3	14366.4	PARENT	5-phosphoribosyl-1-pyrophosphate	S1-00	5-phosphoribosyl-1-pyrophosphate	{'C': ['P']}	15190.9	15190.9	15191.3	1	1
C5H13O14P3	775.851	C13-label-1	5-phosphoribosyl-1-pyrophosphate	S1-00	5-phosphoribosyl-1-pyrophosphate	{'C': ['P']}	-31.8213	0	15191.3	0	0
C5H13O14P3	0	C13-label-2	5-phosphoribosyl-1-pyrophosphate	S1-00	5-phosphoribosyl-1-pyrophosphate	{'C': ['P']}	-17.3039	0	15191.3	0	0
C5H13O14P3	0	C13-label-3	5-phosphoribosyl-1-pyrophosphate	S1-00	5-phosphoribosyl-1-pyrophosphate	{'C': ['P']}	0.391988	0.391988	15191.3	0	0
C5H13O14P3	0	C13-label-4	5-phosphoribosyl-1-pyrophosphate	S1-00	5-phosphoribosyl-1-pyrophosphate	{'C': ['P']}	-0.00328506	0	15191.3	0	0
C5H13O14P3	0	C13-label-5	5-phosphoribosyl-1-pyrophosphate	S1-00	5-phosphoribosyl-1-pyrophosphate	{'C': ['P']}	9.756e-06	9.756e-06	15191.3	0	0
C11H15N5O3S	113163	PARENT	5'-S-Methyl-5'-thioadenosine	S1-00	5'-S-Methyl-5'-thioadenosine	{'C': ['P']}	127946	127946	140199	0.9126	0.9126
C11H15N5O3S	12906.9	C13-label-1	5'-S-Methyl-5'-thioadenosine	S1-00	5'-S-Methyl-5'-thioadenosine	{'C': ['P']}	-1191.2	0	140199	0	0
C11H15N5O3S	2449.51	C13-label-2	5'-S-Methyl-5'-thioadenosine	S1-00	5'-S-Methyl-5'-thioadenosine	{'C': ['P']}	1973.56	1973.56	140199	0.0141	0.0141
C11H15N5O3S	5293.37	C13-label-3	5'-S-Methyl-5'-thioadenosine	S1-00	5'-S-Methyl-5'-thioadenosine	{'C': ['P']}	5568.37	5568.37	140199	0.0397	0.0397
C11H15N5O3S	1214.14	C13-label-4	5'-S-Methyl-5'-thioadenosine	S1-00	5'-S-Methyl-5'-thioadenosine	{'C': ['P']}	809.139	809.139	140199	0.0058	0.0058
C11H15N5O3S	3718.85	C13-label-5	5'-S-Methyl-5'-thioadenosine	S1-00	5'-S-Methyl-5'-thioadenosine	{'C': ['P']}	3894.12	3894.12	140199	0.0278	0.0278
C11H15N5O3S	0	C13-label-6	5'-S-Methyl-5'-thioadenosine	S1-00	5'-S-Methyl-5'-thioadenosine	{'C': ['P']}	-261.872	0	140199	0	0
C11H15N5O3S	0	C13-label-7	5'-S-Methyl-5'-thioadenosine	S1-00	5'-S-Methyl-5'-thioadenosine	{'C': ['P']}	7.29231	7.29231	140199	0.0001	0.0001
C7H15NO2	6.06973e+06	PARENT	Acetylcholine	S1-00	Acetylcholine	{'C': ['P']}	6.563e+06	6.563e+06	6.563e+06	1	1
C7H15NO2	459170	C13-label-1	Acetylcholine	S1-00	Acetylcholine	{'C': ['P']}	-18970.9	0	6.563e+06	0	0
C7H15NO2	7848.63	C13-label-2	Acetylcholine	S1-00	Acetylcholine	{'C': ['P']}	-7418.6	0	6.563e+06	0	0
C23H38N7O17P3S	113262	PARENT	acetyl-CoA	S1-00	acetyl-CoA	{'C': ['P']}	146414	146414	183501	0.7979	0.7979
C23H38N7O17P3S	33029.8	C13-label-1	acetyl-CoA	S1-00	acetyl-CoA	{'C': ['P']}	4844.13	4844.13	183501	0.0264	0.0264
C23H38N7O17P3S	21904.9	C13-label-2	acetyl-CoA	S1-00	acetyl-CoA	{'C': ['P']}	21944.3	21944.3	183501	0.1196	0.1196
C23H38N7O17P3S	0	C13-label-22	acetyl-CoA	S1-00	acetyl-CoA	{'C': ['P']}	0	0	183501	0	0
C23H38N7O17P3S	5648.69	C13-label-3	acetyl-CoA	S1-00	acetyl-CoA	{'C': ['P']}	1453.85	1453.85	183501	0.0079	0.0079
C23H38N7O17P3S	2522.6	C13-label-4	acetyl-CoA	S1-00	acetyl-CoA	{'C': ['P']}	2198.13	2198.13	183501	0.012	0.012
C23H38N7O17P3S	3600.7	C13-label-5	acetyl-CoA	S1-00	acetyl-CoA	{'C': ['P']}	3863.04	3863.04	183501	0.0211	0.0211
C23H38N7O17P3S	2938.26	C13-label-6	acetyl-CoA	S1-00	acetyl-CoA	{'C': ['P']}	2729.76	2729.76	183501	0.0149	0.0149
C23H38N7O17P3S	0	C13-label-7	acetyl-CoA	S1-00	acetyl-CoA	{'C': ['P']}	-591.025	0	183501	0	0
C23H38N7O17P3S	0	C13-label-8	acetyl-CoA	S1-00	acetyl-CoA	{'C': ['P']}	54.7781	54.7781	183501	0.0003	0.0003
C9H17NO4	1.86804e+08	PARENT	Acetyl-L-carnitine	S1-00	Acetyl-L-carnitine	{'C': ['P']}	2.06545e+08	2.06545e+08	2.51306e+08	0.8219	0.8219
C9H17NO4	2.59681e+07	C13-label-1	Acetyl-L-carnitine	S1-00	Acetyl-L-carnitine	{'C': ['P']}	7.75983e+06	7.75983e+06	2.51306e+08	0.0309	0.0309
C9H17NO4	3.57051e+07	C13-label-2	Acetyl-L-carnitine	S1-00	Acetyl-L-carnitine	{'C': ['P']}	3.70016e+07	3.70016e+07	2.51306e+08	0.1472	0.1472
C9H17NO4	2.4532e+06	C13-label-3	Acetyl-L-carnitine	S1-00	Acetyl-L-carnitine	{'C': ['P']}	-302400	0	2.51306e+08	0	0
C9H17NO4	36818.9	C13-label-4	Acetyl-L-carnitine	S1-00	Acetyl-L-carnitine	{'C': ['P']}	-37655.7	0	2.51306e+08	0	0
C5H5N5	800593	PARENT	Adenine	S1-00	Adenine	{'C': ['P']}	846544	846544	878687	0.9634	0.9634
C5H5N5	68279.9	C13-label-1	Adenine	S1-00	Adenine	{'C': ['P']}	24414.4	24414.4	878687	0.0278	0.0278
C5H5N5	9028.72	C13-label-2	Adenine	S1-00	Adenine	{'C': ['P']}	7209.16	7209.16	878687	0.0082	0.0082
C5H5N5	0	C13-label-3	Adenine	S1-00	Adenine	{'C': ['P']}	-269.691	0	878687	0	0
C5H5N5	510.455	C13-label-4	Adenine	S1-00	Adenine	{'C': ['P']}	519.31	519.31	878687	0.0006	0.0006
C5H5N5	0	C13-label-5	Adenine	S1-00	Adenine	{'C': ['P']}	-5.74148	0	878687	0	0
C15H23N5O14P2	90529	PARENT	Adenosine diphosphate ribose	S1-00	Adenosine diphosphate ribose	{'C': ['P']}	107029	107029	121069	0.884	0.884
C15H23N5O14P2	13222.4	C13-label-1	Adenosine diphosphate ribose	S1-00	Adenosine diphosphate ribose	{'C': ['P']}	-2361.47	0	121069	0	0
C15H23N5O14P2	0	C13-label-10	Adenosine diphosphate ribose	S1-00	Adenosine diphosphate ribose	{'C': ['P']}	-0.000221437	0	121069	0	0
C15H23N5O14P2	0	C13-label-11	Adenosine diphosphate ribose	S1-00	Adenosine diphosphate ribose	{'C': ['P']}	2.0482e-06	2.0482e-06	121069	0	0
C15H23N5O14P2	0	C13-label-12	Adenosine diphosphate ribose	S1-00	Adenosine diphosphate ribose	{'C': ['P']}	-1.3e-08	0	121069	0	0
C15H23N5O14P2	5948.47	C13-label-2	Adenosine diphosphate ribose	S1-00	Adenosine diphosphate ribose	{'C': ['P']}	5859.74	5859.74	121069	0.0484	0.0484
C15H23N5O14P2	3319.38	C13-label-3	Adenosine diphosphate ribose	S1-00	Adenosine diphosphate ribose	{'C': ['P']}	2909.46	2909.46	121069	0.024	0.024
C15H23N5O14P2	0	C13-label-4	Adenosine diphosphate ribose	S1-00	Adenosine diphosphate ribose	{'C': ['P']}	-444.897	0	121069	0	0
C15H23N5O14P2	4662.73	C13-label-5	Adenosine diphosphate ribose	S1-00	Adenosine diphosphate ribose	{'C': ['P']}	5241.7	5241.7	121069	0.0433	0.0433
C15H23N5O14P2	0	C13-label-6	Adenosine diphosphate ribose	S1-00	Adenosine diphosphate ribose	{'C': ['P']}	-579.753	0	121069	0	0
C15H23N5O14P2	0	C13-label-7	Adenosine diphosphate ribose	S1-00	Adenosine diphosphate ribose	{'C': ['P']}	28.9323	28.9323	121069	0.0002	0.0002
C15H23N5O14P2	0	C13-label-8	Adenosine diphosphate ribose	S1-00	Adenosine diphosphate ribose	{'C': ['P']}	-0.856078	0	121069	0	0
C15H23N5O14P2	0	C13-label-9	Adenosine diphosphate ribose	S1-00	Adenosine diphosphate ribose	{'C': ['P']}	0.0166262	0.0166262	121069	0	0
C6H10O4	130012	PARENT	Adipic acid	S1-00	Adipic acid	{'C': ['P']}	139017	139017	140620	0.9886	0.9886
C6H10O4	0	C13-label-1	Adipic acid	S1-00	Adipic acid	{'C': ['P']}	-9258.54	0	140620	0	0
C6H10O4	1287.13	C13-label-2	Adipic acid	S1-00	Adipic acid	{'C': ['P']}	1602.82	1602.82	140620	0.0114	0.0114
C6H10O4	0	C13-label-5	Adipic acid	S1-00	Adipic acid	{'C': ['P']}	-0.00750331	0	140620	0	0
C10H15N5O10P2	9.68672e+06	PARENT	ADP	S1-00	ADP	{'C': ['P']}	1.08306e+07	1.08306e+07	1.35014e+07	0.8022	0.8022
C10H15N5O10P2	1.56144e+06	C13-label-1	ADP	S1-00	ADP	{'C': ['P']}	524252	524252	1.35014e+07	0.0388	0.0388
C10H15N5O10P2	0	C13-label-10	ADP	S1-00	ADP	{'C': ['P']}	-6.36706	0	1.35014e+07	0	0
C10H15N5O10P2	693782	C13-label-2	ADP	S1-00	ADP	{'C': ['P']}	646162	646162	1.35014e+07	0.0479	0.0479
C10H15N5O10P2	600275	C13-label-3	ADP	S1-00	ADP	{'C': ['P']}	587576	587576	1.35014e+07	0.0435	0.0435
C10H15N5O10P2	257737	C13-label-4	ADP	S1-00	ADP	{'C': ['P']}	227610	227610	1.35014e+07	0.0169	0.0169
C10H15N5O10P2	539812	C13-label-5	ADP	S1-00	ADP	{'C': ['P']}	554066	554066	1.35014e+07	0.041	0.041
C10H15N5O10P2	131334	C13-label-6	ADP	S1-00	ADP	{'C': ['P']}	106131	106131	1.35014e+07	0.0079	0.0079
C10H15N5O10P2	20666.5	C13-label-7	ADP	S1-00	ADP	{'C': ['P']}	15968.9	15968.9	1.35014e+07	0.0012	0.0012
C10H15N5O10P2	9001.15	C13-label-8	ADP	S1-00	ADP	{'C': ['P']}	8586.5	8586.5	1.35014e+07	0.0006	0.0006
C10H15N5O10P2	665.85	C13-label-9	ADP	S1-00	ADP	{'C': ['P']}	476.178	476.178	1.35014e+07	0	0
C16H25N5O15P2	79322.9	PARENT	ADP-D-glucose	S1-00	ADP-D-glucose	{'C': ['P']}	94833.2	94833.2	141484	0.6703	0.6703
C16H25N5O15P2	21462.8	C13-label-1	ADP-D-glucose	S1-00	ADP-D-glucose	{'C': ['P']}	8532.36	8532.36	141484	0.0603	0.0603
C16H25N5O15P2	0	C13-label-10	ADP-D-glucose	S1-00	ADP-D-glucose	{'C': ['P']}	-88.3559	0	141484	0	0
C16H25N5O15P2	0	C13-label-11	ADP-D-glucose	S1-00	ADP-D-glucose	{'C': ['P']}	2.94298	2.94298	141484	0	0
C16H25N5O15P2	0	C13-label-12	ADP-D-glucose	S1-00	ADP-D-glucose	{'C': ['P']}	-0.0544497	0	141484	0	0
C16H25N5O15P2	0	C13-label-13	ADP-D-glucose	S1-00	ADP-D-glucose	{'C': ['P']}	0.000604413	0.000604413	141484	0	0
C16H25N5O15P2	10199.3	C13-label-2	ADP-D-glucose	S1-00	ADP-D-glucose	{'C': ['P']}	9101.62	9101.62	141484	0.0643	0.0643
C16H25N5O15P2	8323.7	C13-label-3	ADP-D-glucose	S1-00	ADP-D-glucose	{'C': ['P']}	8026.15	8026.15	141484	0.0567	0.0567
C16H25N5O15P2	2847.63	C13-label-4	ADP-D-glucose	S1-00	ADP-D-glucose	{'C': ['P']}	1987.63	1987.63	141484	0.014	0.014
C16H25N5O15P2	6505.25	C13-label-5	ADP-D-glucose	S1-00	ADP-D-glucose	{'C': ['P']}	7008.42	7008.42	141484	0.0495	0.0495
C16H25N5O15P2	10435.5	C13-label-6	ADP-D-glucose	S1-00	ADP-D-glucose	{'C': ['P']}	10792.7	10792.7	141484	0.0763	0.0763
C16H25N5O15P2	0	C13-label-7	ADP-D-glucose	S1-00	ADP-D-glucose	{'C': ['P']}	-1246.17	0	141484	0	0
C16H25N5O15P2	0	C13-label-8	ADP-D-glucose	S1-00	ADP-D-glucose	{'C': ['P']}	63.0544	63.0544	141484	0.0004	0.0004
C16H25N5O15P2	1052.11	C13-label-9	ADP-D-glucose	S1-00	ADP-D-glucose	{'C': ['P']}	1135.73	1135.73	141484	0.008	0.008
C9H15N4O8P	5510.85	PARENT	AICA ribonucleotide	S1-00	AICA ribonucleotide	{'C': ['P']}	6093.23	6093.23	8520.09	0.7152	0.7152
C9H15N4O8P	1268.59	C13-label-1	AICA ribonucleotide	S1-00	AICA ribonucleotide	{'C': ['P']}	778.371	778.371	8520.09	0.0914	0.0914
C9H15N4O8P	0	C13-label-2	AICA ribonucleotide	S1-00	AICA ribonucleotide	{'C': ['P']}	-96.1462	0	8520.09	0	0
C9H15N4O8P	1535.05	C13-label-3	AICA ribonucleotide	S1-00	AICA ribonucleotide	{'C': ['P']}	1645.46	1645.46	8520.09	0.1931	0.1931
C9H15N4O8P	0	C13-label-4	AICA ribonucleotide	S1-00	AICA ribonucleotide	{'C': ['P']}	-109.41	0	8520.09	0	0
C9H15N4O8P	0	C13-label-5	AICA ribonucleotide	S1-00	AICA ribonucleotide	{'C': ['P']}	3.03485	3.03485	8520.09	0.0004	0.0004
C9H15N4O8P	0	C13-label-6	AICA ribonucleotide	S1-00	AICA ribonucleotide	{'C': ['P']}	-0.044908	0	8520.09	0	0
C9H15N4O8P	0	C13-label-7	AICA ribonucleotide	S1-00	AICA ribonucleotide	{'C': ['P']}	0.000373826	0.000373826	8520.09	0	0
C9H15N4O8P	0	C13-label-8	AICA ribonucleotide	S1-00	AICA ribonucleotide	{'C': ['P']}	-1.6597e-06	0	8520.09	0	0
C9H15N4O8P	0	C13-label-9	AICA ribonucleotide	S1-00	AICA ribonucleotide	{'C': ['P']}	3.1e-09	3.1e-09	8520.09	0	0
C4H6N4O3	584909	PARENT	allantoin	S1-00	allantoin	{'C': ['P']}	611616	611616	611616	1	1
C4H6N4O3	21637.9	C13-label-1	allantoin	S1-00	allantoin	{'C': ['P']}	-4781.05	0	611616	0	0
C4H6N4O3	0	C13-label-2	allantoin	S1-00	allantoin	{'C': ['P']}	-292.935	0	611616	0	0
C10H14N5O7P	1.92375e+07	PARENT	AMP	S1-00	AMP	{'C': ['P']}	2.15093e+07	2.15093e+07	2.72267e+07	0.79	0.79
C10H14N5O7P	3.12552e+06	C13-label-1	AMP	S1-00	AMP	{'C': ['P']}	1.06829e+06	1.06829e+06	2.72267e+07	0.0392	0.0392
C10H14N5O7P	0	C13-label-10	AMP	S1-00	AMP	{'C': ['P']}	-22.1333	0	2.72267e+07	0	0
C10H14N5O7P	1.57366e+06	C13-label-2	AMP	S1-00	AMP	{'C': ['P']}	1.49467e+06	1.49467e+06	2.72267e+07	0.0549	0.0549
C10H14N5O7P	1.27144e+06	C13-label-3	AMP	S1-00	AMP	{'C': ['P']}	1.23378e+06	1.23378e+06	2.72267e+07	0.0453	0.0453
C10H14N5O7P	563917	C13-label-4	AMP	S1-00	AMP	{'C': ['P']}	501765	501765	2.72267e+07	0.0184	0.0184
C10H14N5O7P	1.07855e+06	C13-label-5	AMP	S1-00	AMP	{'C': ['P']}	1.10373e+06	1.10373e+06	2.72267e+07	0.0405	0.0405
C10H14N5O7P	307662	C13-label-6	AMP	S1-00	AMP	{'C': ['P']}	259465	259465	2.72267e+07	0.0095	0.0095
C10H14N5O7P	50055.4	C13-label-7	AMP	S1-00	AMP	{'C': ['P']}	38865.4	38865.4	2.72267e+07	0.0014	0.0014
C10H14N5O7P	16192.5	C13-label-8	AMP	S1-00	AMP	{'C': ['P']}	15056.8	15056.8	2.72267e+07	0.0006	0.0006
C10H14N5O7P	2147.72	C13-label-9	AMP	S1-00	AMP	{'C': ['P']}	1821.7	1821.7	2.72267e+07	0.0001	0.0001
C10H18N4O6	156510	PARENT	Arginosuccinic acid	S1-00	Arginosuccinic acid	{'C': ['P']}	174992	174992	260946	0.6706	0.6706
C10H18N4O6	67654.4	C13-label-1	Arginosuccinic acid	S1-00	Arginosuccinic acid	{'C': ['P']}	55379.9	55379.9	260946	0.2122	0.2122
C10H18N4O6	18431	C13-label-2	Arginosuccinic acid	S1-00	Arginosuccinic acid	{'C': ['P']}	13649.9	13649.9	260946	0.0523	0.0523
C10H18N4O6	10429.6	C13-label-3	Arginosuccinic acid	S1-00	Arginosuccinic acid	{'C': ['P']}	9790.7	9790.7	260946	0.0375	0.0375
C10H18N4O6	7419.8	C13-label-4	Arginosuccinic acid	S1-00	Arginosuccinic acid	{'C': ['P']}	7118.99	7118.99	260946	0.0273	0.0273
C10H18N4O6	0	C13-label-5	Arginosuccinic acid	S1-00	Arginosuccinic acid	{'C': ['P']}	-500.616	0	260946	0	0
C10H18N4O6	0	C13-label-6	Arginosuccinic acid	S1-00	Arginosuccinic acid	{'C': ['P']}	14.1428	14.1428	260946	0.0001	0.0001
C10H16N5O13P3	2.70467e+06	PARENT	ATP	S1-00	ATP	{'C': ['P']}	3.02406e+06	3.02406e+06	3.69282e+06	0.8189	0.8189
C10H16N5O13P3	410857	C13-label-1	ATP	S1-00	ATP	{'C': ['P']}	118605	118605	3.69282e+06	0.0321	0.0321
C10H16N5O13P3	0	C13-label-10	ATP	S1-00	ATP	{'C': ['P']}	-6.73619	0	3.69282e+06	0	0
C10H16N5O13P3	168790	C13-label-2	ATP	S1-00	ATP	{'C': ['P']}	155941	155941	3.69282e+06	0.0422	0.0422
C10H16N5O13P3	152602	C13-label-3	ATP	S1-00	ATP	{'C': ['P']}	150133	150133	3.69282e+06	0.0407	0.0407
C10H16N5O13P3	62802.7	C13-label-4	ATP	S1-00	ATP	{'C': ['P']}	54926.2	54926.2	3.69282e+06	0.0149	0.0149
C10H16N5O13P3	145346	C13-label-5	ATP	S1-00	ATP	{'C': ['P']}	149630	149630	3.69282e+06	0.0405	0.0405
C10H16N5O13P3	37818.7	C13-label-6	ATP	S1-00	ATP	{'C': ['P']}	31132.1	31132.1	3.69282e+06	0.0084	0.0084
C10H16N5O13P3	7224.61	C13-label-7	ATP	S1-00	ATP	{'C': ['P']}	5902.42	5902.42	3.69282e+06	0.0016	0.0016
C10H16N5O13P3	2082.18	C13-label-8	ATP	S1-00	ATP	{'C': ['P']}	1907.56	1907.56	3.69282e+06	0.0005	0.0005
C10H16N5O13P3	622.64	C13-label-9	ATP	S1-00	ATP	{'C': ['P']}	584.918	584.918	3.69282e+06	0.0002	0.0002
C5H11NO2	2.58172e+08	PARENT	Betaine	S1-00	Betaine	{'C': ['P']}	2.7299e+08	2.7299e+08	2.73924e+08	0.9966	0.9966
C5H11NO2	1.53824e+07	C13-label-1	Betaine	S1-00	Betaine	{'C': ['P']}	933857	933857	2.73924e+08	0.0034	0.0034
C5H11NO2	292849	C13-label-2	Betaine	S1-00	Betaine	{'C': ['P']}	-74992.9	0	2.73924e+08	0	0
C10H16N2O3S	233585	PARENT	biotin	S1-00	biotin	{'C': ['P']}	261169	261169	312951	0.8345	0.8345
C10H16N2O3S	72193.8	C13-label-1	biotin	S1-00	biotin	{'C': ['P']}	50833.4	50833.4	312951	0.1624	0.1624
C10H16N2O3S	6836.75	C13-label-2	biotin	S1-00	biotin	{'C': ['P']}	949.037	949.037	312951	0.003	0.003
C9H14N4O3	80445.7	PARENT	Carnosine	S1-00	Carnosine	{'C': ['P']}	88947.1	88947.1	88957	0.9999	0.9999
C9H14N4O3	5353.68	C13-label-1	Carnosine	S1-00	Carnosine	{'C': ['P']}	-3032.07	0	88957	0	0
C9H14N4O3	0	C13-label-3	Carnosine	S1-00	Carnosine	{'C': ['P']}	9.97637	9.97637	88957	0.0001	0.0001
C9H14N4O3	0	C13-label-7	Carnosine	S1-00	Carnosine	{'C': ['P']}	2.401e-07	2.401e-07	88957	0	0
C9H14N4O3	0	C13-label-9	Carnosine	S1-00	Carnosine	{'C': ['P']}	0	0	88957	0	0
C9H15N3O11P2	771533	PARENT	CDP	S1-00	CDP	{'C': ['P']}	853067	853067	877233	0.9725	0.9725
C9H15N3O11P2	70147.9	C13-label-1	CDP	S1-00	CDP	{'C': ['P']}	-8521.36	0	877233	0	0
C9H15N3O11P2	11561.5	C13-label-2	CDP	S1-00	CDP	{'C': ['P']}	9473.93	9473.93	877233	0.0108	0.0108
C9H15N3O11P2	5145.18	C13-label-3	CDP	S1-00	CDP	{'C': ['P']}	4696.84	4696.84	877233	0.0054	0.0054
C9H15N3O11P2	3800.99	C13-label-4	CDP	S1-00	CDP	{'C': ['P']}	3680.86	3680.86	877233	0.0042	0.0042
C9H15N3O11P2	4657.85	C13-label-5	CDP	S1-00	CDP	{'C': ['P']}	4657.09	4657.09	877233	0.0053	0.0053
C9H15N3O11P2	1806.45	C13-label-6	CDP	S1-00	CDP	{'C': ['P']}	1656.52	1656.52	877233	0.0019	0.0019
C9H15N3O11P2	0	C13-label-7	CDP	S1-00	CDP	{'C': ['P']}	-58.6563	0	877233	0	0
C9H15N3O11P2	0	C13-label-8	CDP	S1-00	CDP	{'C': ['P']}	0.66411	0.66411	877233	0	0
C9H15N3O11P2	0	C13-label-9	CDP	S1-00	CDP	{'C': ['P']}	-0.00248141	0	877233	0	0
C14H26N4O11P2	5.59519e+06	PARENT	CDP-choline	S1-00	CDP-choline	{'C': ['P']}	6.54156e+06	6.54156e+06	6.59809e+06	0.9914	0.9914
C14H26N4O11P2	870249	C13-label-1	CDP-choline	S1-00	CDP-choline	{'C': ['P']}	-10408.4	0	6.59809e+06	0	0
C14H26N4O11P2	89736.3	C13-label-2	CDP-choline	S1-00	CDP-choline	{'C': ['P']}	30755.4	30755.4	6.59809e+06	0.0047	0.0047
C14H26N4O11P2	12077.1	C13-label-3	CDP-choline	S1-00	CDP-choline	{'C': ['P']}	6401.72	6401.72	6.59809e+06	0.001	0.001
C14H26N4O11P2	1728.47	C13-label-4	CDP-choline	S1-00	CDP-choline	{'C': ['P']}	805.499	805.499	6.59809e+06	0.0001	0.0001
C14H26N4O11P2	16356.9	C13-label-5	CDP-choline	S1-00	CDP-choline	{'C': ['P']}	17941.3	17941.3	6.59809e+06	0.0027	0.0027
C14H26N4O11P2	2207.43	C13-label-6	CDP-choline	S1-00	CDP-choline	{'C': ['P']}	615.104	615.104	6.59809e+06	0.0001	0.0001
C14H26N4O11P2	0	C13-label-7	CDP-choline	S1-00	CDP-choline	{'C': ['P']}	-134.37	0	6.59809e+06	0	0
C14H26N4O11P2	0	C13-label-8	CDP-choline	S1-00	CDP-choline	{'C': ['P']}	6.25425	6.25425	6.59809e+06	0	0
C14H26N4O11P2	0	C13-label-9	CDP-choline	S1-00	CDP-choline	{'C': ['P']}	-0.150331	0	6.59809e+06	0	0
C11H20N4O11P2	2.46075e+06	PARENT	CDP-ethanolamine	S1-00	CDP-ethanolamine	{'C': ['P']}	2.78222e+06	2.78222e+06	2.81296e+06	0.9891	0.9891
C11H20N4O11P2	288979	C13-label-1	CDP-ethanolamine	S1-00	CDP-ethanolamine	{'C': ['P']}	-16604.9	0	2.81296e+06	0	0
C11H20N4O11P2	35667	C13-label-2	CDP-ethanolamine	S1-00	CDP-ethanolamine	{'C': ['P']}	22425.6	22425.6	2.81296e+06	0.008	0.008
C11H20N4O11P2	3162.1	C13-label-3	CDP-ethanolamine	S1-00	CDP-ethanolamine	{'C': ['P']}	681.375	681.375	2.81296e+06	0.0002	0.0002
C11H20N4O11P2	2412	C13-label-4	CDP-ethanolamine	S1-00	CDP-ethanolamine	{'C': ['P']}	2436.82	2436.82	2.81296e+06	0.0009	0.0009
C11H20N4O11P2	5033.55	C13-label-5	CDP-ethanolamine	S1-00	CDP-ethanolamine	{'C': ['P']}	5187.77	5187.77	2.81296e+06	0.0018	0.0018
C11H20N4O11P2	0	C13-label-6	CDP-ethanolamine	S1-00	CDP-ethanolamine	{'C': ['P']}	-351.907	0	2.81296e+06	0	0
C11H20N4O11P2	0	C13-label-7	CDP-ethanolamine	S1-00	CDP-ethanolamine	{'C': ['P']}	9.82522	9.82522	2.81296e+06	0	0
C11H20N4O11P2	0	C13-label-8	CDP-ethanolamine	S1-00	CDP-ethanolamine	{'C': ['P']}	-0.145859	0	2.81296e+06	0	0
C11H20N4O11P2	0	C13-label-9	CDP-ethanolamine	S1-00	CDP-ethanolamine	{'C': ['P']}	0.00121651	0.00121651	2.81296e+06	0	0
C5H13NO	2.88609e+08	PARENT	Choline	S1-00	Choline	{'C': ['P']}	3.05174e+08	3.05174e+08	3.06758e+08	0.9948	0.9948
C5H13NO	1.77125e+07	C13-label-1	Choline	S1-00	Choline	{'C': ['P']}	1.58408e+06	1.58408e+06	3.06758e+08	0.0052	0.0052
C5H13NO	296903	C13-label-2	Choline	S1-00	Choline	{'C': ['P']}	-139324	0	3.06758e+08	0	0
C5H13NO	0	C13-label-3	Choline	S1-00	Choline	{'C': ['P']}	-705.209	0	3.06758e+08	0	0
C6H8O7	47574.3	PARENT	citric acid	S1-00	citric acid	{'C': ['P']}	50869.6	50869.6	78912.2	0.6446	0.6446
C6H8O7	13982.2	C13-label-1	citric acid	S1-00	citric acid	{'C': ['P']}	11396.8	11396.8	78912.2	0.1444	0.1444
C6H8O7	13296.7	C13-label-2	citric acid	S1-00	citric acid	{'C': ['P']}	13177.3	13177.3	78912.2	0.167	0.167
C6H8O7	3935	C13-label-3	citric acid	S1-00	citric acid	{'C': ['P']}	3468.5	3468.5	78912.2	0.044	0.044
C6H8O7	0	C13-label-4	citric acid	S1-00	citric acid	{'C': ['P']}	-125.41	0	78912.2	0	0
C9H14N3O8P	518470	PARENT	CMP	S1-00	CMP	{'C': ['P']}	573261	573261	582297	0.9845	0.9845
C9H14N3O8P	49311.7	C13-label-1	CMP	S1-00	CMP	{'C': ['P']}	-3351.14	0	582297	0	0
C9H14N3O8P	3773.25	C13-label-2	CMP	S1-00	CMP	{'C': ['P']}	1834.75	1834.75	582297	0.0032	0.0032
C9H14N3O8P	2597.89	C13-label-3	CMP	S1-00	CMP	{'C': ['P']}	2580.98	2580.98	582297	0.0044	0.0044
C9H14N3O8P	2517.65	C13-label-4	CMP	S1-00	CMP	{'C': ['P']}	2484.68	2484.68	582297	0.0043	0.0043
C9H14N3O8P	2177.51	C13-label-5	CMP	S1-00	CMP	{'C': ['P']}	2134.17	2134.17	582297	0.0037	0.0037
C9H14N3O8P	0	C13-label-6	CMP	S1-00	CMP	{'C': ['P']}	-97.8903	0	582297	0	0
C9H14N3O8P	0	C13-label-7	CMP	S1-00	CMP	{'C': ['P']}	1.64746	1.64746	582297	0	0
C9H14N3O8P	0	C13-label-8	CMP	S1-00	CMP	{'C': ['P']}	-0.0122567	0	582297	0	0
C21H36N7O16P3S	48128.7	PARENT	Coenzyme A	S1-00	Coenzyme A	{'C': ['P']}	60842.1	60842.1	64228.2	0.9473	0.9473
C21H36N7O16P3S	9027.21	C13-label-1	Coenzyme A	S1-00	Coenzyme A	{'C': ['P']}	-2897.2	0	64228.2	0	0
C21H36N7O16P3S	0	C13-label-14	Coenzyme A	S1-00	Coenzyme A	{'C': ['P']}	0	0	64228.2	0	0
C21H36N7O16P3S	2795.98	C13-label-2	Coenzyme A	S1-00	Coenzyme A	{'C': ['P']}	2525.46	2525.46	64228.2	0.0393	0.0393
C21H36N7O16P3S	1156.11	C13-label-3	Coenzyme A	S1-00	Coenzyme A	{'C': ['P']}	837.908	837.908	64228.2	0.013	0.013
C21H36N7O16P3S	0	C13-label-4	Coenzyme A	S1-00	Coenzyme A	{'C': ['P']}	-221.634	0	64228.2	0	0
C21H36N7O16P3S	0	C13-label-5	Coenzyme A	S1-00	Coenzyme A	{'C': ['P']}	22.6844	22.6844	64228.2	0.0004	0.0004
C21H36N7O16P3S	0	C13-label-6	Coenzyme A	S1-00	Coenzyme A	{'C': ['P']}	-1.39723	0	64228.2	0	0
C21H36N7O16P3S	0	C13-label-8	Coenzyme A	S1-00	Coenzyme A	{'C': ['P']}	-0.00188047	0	64228.2	0	0
C4H9N3O2	2.75897e+07	PARENT	Creatine	S1-00	Creatine	{'C': ['P']}	2.88495e+07	2.88495e+07	2.89075e+07	0.998	0.998
C4H9N3O2	1.29487e+06	C13-label-1	Creatine	S1-00	Creatine	{'C': ['P']}	58044.7	58044.7	2.89075e+07	0.002	0.002
C4H9N3O2	16988.5	C13-label-2	Creatine	S1-00	Creatine	{'C': ['P']}	-5888.09	0	2.89075e+07	0	0
C4H7N3O	1.21696e+07	PARENT	Creatinine	S1-00	Creatinine	{'C': ['P']}	1.27253e+07	1.27253e+07	1.27334e+07	0.9994	0.9994
C4H7N3O	462390	C13-label-1	Creatinine	S1-00	Creatinine	{'C': ['P']}	-86867	0	1.27334e+07	0	0
C4H7N3O	14339	C13-label-2	Creatinine	S1-00	Creatinine	{'C': ['P']}	8148.11	8148.11	1.27334e+07	0.0006	0.0006
C10H12N5O6P	71779.1	PARENT	cyclic-AMP	S1-00	cyclic-AMP	{'C': ['P']}	80255.4	80255.4	111703	0.7185	0.7185
C10H12N5O6P	26593.9	C13-label-1	cyclic-AMP	S1-00	cyclic-AMP	{'C': ['P']}	20495.9	20495.9	111703	0.1835	0.1835
C10H12N5O6P	11053.7	C13-label-2	cyclic-AMP	S1-00	cyclic-AMP	{'C': ['P']}	9593.7	9593.7	111703	0.0859	0.0859
C10H12N5O6P	2140.12	C13-label-3	cyclic-AMP	S1-00	cyclic-AMP	{'C': ['P']}	1358.04	1358.04	111703	0.0122	0.0122
C10H12N5O6P	0	C13-label-4	cyclic-AMP	S1-00	cyclic-AMP	{'C': ['P']}	-141.227	0	111703	0	0
C7H14N2O4S	38239.5	PARENT	Cystathionine	S1-00	Cystathionine	{'C': ['P']}	41347.1	41347.1	41348.2	1	1
C7H14N2O4S	1530.46	C13-label-1	Cystathionine	S1-00	Cystathionine	{'C': ['P']}	-1576.2	0	41348.2	0	0
C7H14N2O4S	0	C13-label-3	Cystathionine	S1-00	Cystathionine	{'C': ['P']}	1.04527	1.04527	41348.2	0	0
C9H13N3O5	37907.6	PARENT	Cytidine	S1-00	Cytidine	{'C': ['P']}	41913.6	41913.6	41920.6	0.9998	0.9998
C9H13N3O5	3118.24	C13-label-1	Cytidine	S1-00	Cytidine	{'C': ['P']}	-777.67	0	41920.6	0	0
C9H13N3O5	0	C13-label-2	Cytidine	S1-00	Cytidine	{'C': ['P']}	-116.853	0	41920.6	0	0
C9H13N3O5	0	C13-label-3	Cytidine	S1-00	Cytidine	{'C': ['P']}	6.94729	6.94729	41920.6	0.0002	0.0002
C9H13N3O5	0	C13-label-4	Cytidine	S1-00	Cytidine	{'C': ['P']}	-0.180954	0	41920.6	0	0
C9H13N3O5	0	C13-label-5	Cytidine	S1-00	Cytidine	{'C': ['P']}	0.0027332	0.0027332	41920.6	0	0
C9H13N3O5	0	C13-label-6	Cytidine	S1-00	Cytidine	{'C': ['P']}	-2.55879e-05	0	41920.6	0	0
C6H12O6	433588	PARENT	D-(-)-Fructose	S1-00	D-(-)-Fructose	{'C': ['P']}	463621	463621	463991	0.9992	0.9992
C6H12O6	25077.7	C13-label-1	D-(-)-Fructose	S1-00	D-(-)-Fructose	{'C': ['P']}	-4360.11	0	463991	0	0
C6H12O6	0	C13-label-5	D-(-)-Fructose	S1-00	D-(-)-Fructose	{'C': ['P']}	0.001544	0.001544	463991	0	0
C6H12O6	370.45	C13-label-6	D-(-)-Fructose	S1-00	D-(-)-Fructose	{'C': ['P']}	370.45	370.45	463991	0.0008	0.0008
C6H12O6	731802	PARENT	D-(+)-Glucose	S1-00	D-(+)-Glucose	{'C': ['P']}	782491	782491	795687	0.9834	0.9834
C6H12O6	36276	C13-label-1	D-(+)-Glucose	S1-00	D-(+)-Glucose	{'C': ['P']}	-13755.8	0	795687	0	0
C6H12O6	1076.78	C13-label-2	D-(+)-Glucose	S1-00	D-(+)-Glucose	{'C': ['P']}	443.231	443.231	795687	0.0006	0.0006
C6H12O6	848.137	C13-label-3	D-(+)-Glucose	S1-00	D-(+)-Glucose	{'C': ['P']}	852.884	852.884	795687	0.0011	0.0011
C6H12O6	0	C13-label-4	D-(+)-Glucose	S1-00	D-(+)-Glucose	{'C': ['P']}	-28.7188	0	795687	0	0
C6H12O6	0	C13-label-5	D-(+)-Glucose	S1-00	D-(+)-Glucose	{'C': ['P']}	0.320133	0.320133	795687	0	0
C6H12O6	11899.3	C13-label-6	D-(+)-Glucose	S1-00	D-(+)-Glucose	{'C': ['P']}	11899.3	11899.3	795687	0.015	0.015
C5H10O5	37206.2	PARENT	D-(+)-Xylose	S1-00	D-(+)-Xylose	{'C': ['P']}	39341.7	39341.7	39341.7	1	1
C5H10O5	1594.94	C13-label-1	D-(+)-Xylose	S1-00	D-(+)-Xylose	{'C': ['P']}	-515.704	0	39341.7	0	0
C5H8O5	305864	PARENT	D-a-Hydroxyglutaric acid	S1-00	D-a-Hydroxyglutaric acid	{'C': ['P']}	323420	323420	329423	0.9818	0.9818
C5H8O5	19302.6	C13-label-1	D-a-Hydroxyglutaric acid	S1-00	D-a-Hydroxyglutaric acid	{'C': ['P']}	2234.16	2234.16	329423	0.0068	0.0068
C5H8O5	0	C13-label-2	D-a-Hydroxyglutaric acid	S1-00	D-a-Hydroxyglutaric acid	{'C': ['P']}	-497.682	0	329423	0	0
C5H8O5	2502.7	C13-label-3	D-a-Hydroxyglutaric acid	S1-00	D-a-Hydroxyglutaric acid	{'C': ['P']}	2569.69	2569.69	329423	0.0078	0.0078
C5H8O5	1241.78	C13-label-4	D-a-Hydroxyglutaric acid	S1-00	D-a-Hydroxyglutaric acid	{'C': ['P']}	1198.81	1198.81	329423	0.0036	0.0036
C5H8O5	0	C13-label-5	D-a-Hydroxyglutaric acid	S1-00	D-a-Hydroxyglutaric acid	{'C': ['P']}	-13.6229	0	329423	0	0
C10H14N5O6P	25829.9	PARENT	dAMP	S1-00	dAMP	{'C': ['P']}	28880.1	28880.1	34495.4	0.8372	0.8372
C10H14N5O6P	4369.28	C13-label-1	dAMP	S1-00	dAMP	{'C': ['P']}	1625.33	1625.33	34495.4	0.0471	0.0471
C10H14N5O6P	1144	C13-label-2	dAMP	S1-00	dAMP	{'C': ['P']}	928.359	928.359	34495.4	0.0269	0.0269
C10H14N5O6P	1608.66	C13-label-3	dAMP	S1-00	dAMP	{'C': ['P']}	1645	1645	34495.4	0.0477	0.0477
C10H14N5O6P	729.89	C13-label-4	dAMP	S1-00	dAMP	{'C': ['P']}	649.148	649.148	34495.4	0.0188	0.0188
C10H14N5O6P	769.862	C13-label-5	dAMP	S1-00	dAMP	{'C': ['P']}	766.485	766.485	34495.4	0.0222	0.0222
C10H14N5O6P	0	C13-label-6	dAMP	S1-00	dAMP	{'C': ['P']}	-43.8194	0	34495.4	0	0
C10H14N5O6P	0	C13-label-7	dAMP	S1-00	dAMP	{'C': ['P']}	0.982556	0.982556	34495.4	0	0
C9H15N3O10P2	53129	PARENT	dCDP	S1-00	dCDP	{'C': ['P']}	58743.5	58743.5	58753.1	0.9998	0.9998
C9H15N3O10P2	4335.5	C13-label-1	dCDP	S1-00	dCDP	{'C': ['P']}	-1128.03	0	58753.1	0	0
C9H15N3O10P2	0	C13-label-2	dCDP	S1-00	dCDP	{'C': ['P']}	-160.392	0	58753.1	0	0
C9H15N3O10P2	0	C13-label-3	dCDP	S1-00	dCDP	{'C': ['P']}	9.60547	9.60547	58753.1	0.0002	0.0002
C9H15N3O10P2	0	C13-label-4	dCDP	S1-00	dCDP	{'C': ['P']}	-0.250696	0	58753.1	0	0
C9H15N3O10P2	0	C13-label-5	dCDP	S1-00	dCDP	{'C': ['P']}	0.00379021	0.00379021	58753.1	0	0
C9H15N3O10P2	0	C13-label-6	dCDP	S1-00	dCDP	{'C': ['P']}	-3.55029e-05	0	58753.1	0	0
C9H14N3O7P	119452	PARENT	dCMP	S1-00	dCMP	{'C': ['P']}	132075	132075	132095	0.9999	0.9999
C9H14N3O7P	9161.54	C13-label-1	dCMP	S1-00	dCMP	{'C': ['P']}	-3177.03	0	132095	0	0
C9H14N3O7P	0	C13-label-2	dCMP	S1-00	dCMP	{'C': ['P']}	-303.707	0	132095	0	0
C9H14N3O7P	0	C13-label-3	dCMP	S1-00	dCMP	{'C': ['P']}	19.3855	19.3855	132095	0.0001	0.0001
C9H14N3O7P	0	C13-label-4	dCMP	S1-00	dCMP	{'C': ['P']}	-0.514567	0	132095	0	0
C9H14N3O7P	0	C13-label-5	dCMP	S1-00	dCMP	{'C': ['P']}	0.00784067	0.00784067	132095	0	0
C5H11O7P	6698.54	PARENT	deoxyribose-phosphate	S1-00	deoxyribose-phosphate	{'C': ['P']}	7083.01	7083.01	7091.74	0.9988	0.9988
C5H11O7P	0	C13-label-1	deoxyribose-phosphate	S1-00	deoxyribose-phosphate	{'C': ['P']}	-393.107	0	7091.74	0	0
C5H11O7P	0	C13-label-2	deoxyribose-phosphate	S1-00	deoxyribose-phosphate	{'C': ['P']}	8.72698	8.72698	7091.74	0.0012	0.0012
C5H11O7P	0	C13-label-3	deoxyribose-phosphate	S1-00	deoxyribose-phosphate	{'C': ['P']}	-0.0968695	0	7091.74	0	0
C5H11O7P	0	C13-label-5	deoxyribose-phosphate	S1-00	deoxyribose-phosphate	{'C': ['P']}	-1.1935e-06	0	7091.74	0	0
C6H12O7	592545	PARENT	D-gluconate	S1-00	D-gluconate	{'C': ['P']}	633588	633588	666485	0.9506	0.9506
C6H12O7	43197.7	C13-label-1	D-gluconate	S1-00	D-gluconate	{'C': ['P']}	3480.19	3480.19	666485	0.0052	0.0052
C6H12O7	8363.98	C13-label-2	D-gluconate	S1-00	D-gluconate	{'C': ['P']}	7381.77	7381.77	666485	0.0111	0.0111
C6H12O7	10930	C13-label-3	D-gluconate	S1-00	D-gluconate	{'C': ['P']}	10952.8	10952.8	666485	0.0164	0.0164
C6H12O7	2124.71	C13-label-4	D-gluconate	S1-00	D-gluconate	{'C': ['P']}	1802.3	1802.3	666485	0.0027	0.0027
C6H12O7	2091.73	C13-label-5	D-gluconate	S1-00	D-gluconate	{'C': ['P']}	2071.11	2071.11	666485	0.0031	0.0031
C6H12O7	7231.58	C13-label-6	D-gluconate	S1-00	D-gluconate	{'C': ['P']}	7208.35	7208.35	666485	0.0108	0.0108
C6H13O9P	101761	PARENT	D-Glucose 6-phosphate	S1-00	D-Glucose 6-phosphate	{'C': ['P']}	108810	108810	141422	0.7694	0.7694
C6H13O9P	10307	C13-label-1	D-Glucose 6-phosphate	S1-00	D-Glucose 6-phosphate	{'C': ['P']}	3651.91	3651.91	141422	0.0258	0.0258
C6H13O9P	5355.5	C13-label-2	D-Glucose 6-phosphate	S1-00	D-Glucose 6-phosphate	{'C': ['P']}	5196.25	5196.25	141422	0.0367	0.0367
C6H13O9P	19799.4	C13-label-3	D-Glucose 6-phosphate	S1-00	D-Glucose 6-phosphate	{'C': ['P']}	20235.5	20235.5	141422	0.1431	0.1431
C6H13O9P	2012.52	C13-label-4	D-Glucose 6-phosphate	S1-00	D-Glucose 6-phosphate	{'C': ['P']}	1380.19	1380.19	141422	0.0098	0.0098
C6H13O9P	2162.3	C13-label-5	D-Glucose 6-phosphate	S1-00	D-Glucose 6-phosphate	{'C': ['P']}	2148.42	2148.42	141422	0.0152	0.0152
C6H13O9P	0	C13-label-6	D-Glucose 6-phosphate	S1-00	D-Glucose 6-phosphate	{'C': ['P']}	-24.0453	0	141422	0	0
C3H7O6P	77324.8	PARENT	D-glyceraldehdye-3-phosphate	S1-00	D-glyceraldehdye-3-phosphate	{'C': ['P']}	79958	79958	99149.5	0.8064	0.8064
C3H7O6P	6216.83	C13-label-1	D-glyceraldehdye-3-phosphate	S1-00	D-glyceraldehdye-3-phosphate	{'C': ['P']}	3694.58	3694.58	99149.5	0.0373	0.0373
C3H7O6P	0	C13-label-2	D-glyceraldehdye-3-phosphate	S1-00	D-glyceraldehdye-3-phosphate	{'C': ['P']}	-111.575	0	99149.5	0	0
C3H7O6P	15496.2	C13-label-3	D-glyceraldehdye-3-phosphate	S1-00	D-glyceraldehdye-3-phosphate	{'C': ['P']}	15496.9	15496.9	99149.5	0.1563	0.1563
C5H6N2O4	25575.9	PARENT	dihydroorotate	S1-00	dihydroorotate	{'C': ['P']}	27043.9	27043.9	41837.6	0.6464	0.6464
C5H6N2O4	7807.88	C13-label-1	dihydroorotate	S1-00	dihydroorotate	{'C': ['P']}	6663.45	6663.45	41837.6	0.1593	0.1593
C5H6N2O4	6489.37	C13-label-2	dihydroorotate	S1-00	dihydroorotate	{'C': ['P']}	6381.17	6381.17	41837.6	0.1525	0.1525
C5H6N2O4	827.95	C13-label-3	dihydroorotate	S1-00	dihydroorotate	{'C': ['P']}	628.852	628.852	41837.6	0.015	0.015
C5H6N2O4	647.95	C13-label-4	dihydroorotate	S1-00	dihydroorotate	{'C': ['P']}	638.866	638.866	41837.6	0.0153	0.0153
C5H6N2O4	488.555	C13-label-5	dihydroorotate	S1-00	dihydroorotate	{'C': ['P']}	481.377	481.377	41837.6	0.0115	0.0115
C3H7O6P	82695.7	PARENT	dihydroxy-acetone-phosphate	S1-00	dihydroxy-acetone-phosphate	{'C': ['P']}	85511.8	85511.8	103601	0.8254	0.8254
C3H7O6P	3165.6	C13-label-1	dihydroxy-acetone-phosphate	S1-00	dihydroxy-acetone-phosphate	{'C': ['P']}	389.525	389.525	103601	0.0038	0.0038
C3H7O6P	10950.6	C13-label-2	dihydroxy-acetone-phosphate	S1-00	dihydroxy-acetone-phosphate	{'C': ['P']}	11033.2	11033.2	103601	0.1065	0.1065
C3H7O6P	6789.01	C13-label-3	dihydroxy-acetone-phosphate	S1-00	dihydroxy-acetone-phosphate	{'C': ['P']}	6666.38	6666.38	103601	0.0643	0.0643
C6H14N4O2	3.85103e+06	PARENT	DL-Arginine	S1-00	DL-Arginine	{'C': ['P']}	4.11778e+06	4.11778e+06	4.17843e+06	0.9855	0.9855
C6H14N4O2	308857	C13-label-1	DL-Arginine	S1-00	DL-Arginine	{'C': ['P']}	52341	52341	4.17843e+06	0.0125	0.0125
C6H14N4O2	14425	C13-label-2	DL-Arginine	S1-00	DL-Arginine	{'C': ['P']}	4568.4	4568.4	4.17843e+06	0.0011	0.0011
C6H14N4O2	2354.91	C13-label-3	DL-Arginine	S1-00	DL-Arginine	{'C': ['P']}	2055.14	2055.14	4.17843e+06	0.0005	0.0005
C6H14N4O2	836.01	C13-label-4	DL-Arginine	S1-00	DL-Arginine	{'C': ['P']}	781.416	781.416	4.17843e+06	0.0002	0.0002
C6H14N4O2	0	C13-label-5	DL-Arginine	S1-00	DL-Arginine	{'C': ['P']}	-18.1402	0	4.17843e+06	0	0
C6H14N4O2	907.6	C13-label-6	DL-Arginine	S1-00	DL-Arginine	{'C': ['P']}	907.702	907.702	4.17843e+06	0.0002	0.0002
C5H11O8P	25934.2	PARENT	D-Ribose-1-phosphate	S1-00	D-Ribose-1-phosphate	{'C': ['P']}	27422.7	27422.7	30408.7	0.9018	0.9018
C5H11O8P	0	C13-label-1	D-Ribose-1-phosphate	S1-00	D-Ribose-1-phosphate	{'C': ['P']}	-1521.96	0	30408.7	0	0
C5H11O8P	1279.29	C13-label-2	D-Ribose-1-phosphate	S1-00	D-Ribose-1-phosphate	{'C': ['P']}	1356.64	1356.64	30408.7	0.0446	0.0446
C5H11O8P	718.195	C13-label-3	D-Ribose-1-phosphate	S1-00	D-Ribose-1-phosphate	{'C': ['P']}	689.982	689.982	30408.7	0.0227	0.0227
C5H11O8P	0	C13-label-4	D-Ribose-1-phosphate	S1-00	D-Ribose-1-phosphate	{'C': ['P']}	-15.8128	0	30408.7	0	0
C5H11O8P	939.254	C13-label-5	D-Ribose-1-phosphate	S1-00	D-Ribose-1-phosphate	{'C': ['P']}	939.342	939.342	30408.7	0.0309	0.0309
C7H15O10P	196080	PARENT	D-Sedoheptulose 7-phosphate	S1-00	D-Sedoheptulose 7-phosphate	{'C': ['P']}	212015	212015	222065	0.9547	0.9547
C7H15O10P	0	C13-label-1	D-Sedoheptulose 7-phosphate	S1-00	D-Sedoheptulose 7-phosphate	{'C': ['P']}	-16473.6	0	222065	0	0
C7H15O10P	6656.24	C13-label-2	D-Sedoheptulose 7-phosphate	S1-00	D-Sedoheptulose 7-phosphate	{'C': ['P']}	7586.86	7586.86	222065	0.0342	0.0342
C7H15O10P	0	C13-label-3	D-Sedoheptulose 7-phosphate	S1-00	D-Sedoheptulose 7-phosphate	{'C': ['P']}	-400.774	0	222065	0	0
C7H15O10P	0	C13-label-4	D-Sedoheptulose 7-phosphate	S1-00	D-Sedoheptulose 7-phosphate	{'C': ['P']}	8.78452	8.78452	222065	0	0
C7H15O10P	0	C13-label-5	D-Sedoheptulose 7-phosphate	S1-00	D-Sedoheptulose 7-phosphate	{'C': ['P']}	-0.0970081	0	222065	0	0
C7H15O10P	2454.37	C13-label-7	D-Sedoheptulose 7-phosphate	S1-00	D-Sedoheptulose 7-phosphate	{'C': ['P']}	2454.37	2454.37	222065	0.0111	0.0111
C10H16N2O11P2	159368	PARENT	dTDP	S1-00	dTDP	{'C': ['P']}	178188	178188	333416	0.5344	0.5344
C10H16N2O11P2	24184.4	C13-label-1	dTDP	S1-00	dTDP	{'C': ['P']}	6961.28	6961.28	333416	0.0209	0.0209
C10H16N2O11P2	800.716	C13-label-2	dTDP	S1-00	dTDP	{'C': ['P']}	-807.879	0	333416	0	0
C10H16N2O11P2	135045	C13-label-3	dTDP	S1-00	dTDP	{'C': ['P']}	146032	146032	333416	0.438	0.438
C10H16N2O11P2	9513.53	C13-label-4	dTDP	S1-00	dTDP	{'C': ['P']}	-1172.74	0	333416	0	0
C10H16N2O11P2	2394.86	C13-label-5	dTDP	S1-00	dTDP	{'C': ['P']}	2232.62	2232.62	333416	0.0067	0.0067
C10H16N2O11P2	0	C13-label-6	dTDP	S1-00	dTDP	{'C': ['P']}	-128.733	0	333416	0	0
C10H16N2O11P2	0	C13-label-7	dTDP	S1-00	dTDP	{'C': ['P']}	2.91941	2.91941	333416	0	0
C10H17N2O14P3	124736	PARENT	dTTP	S1-00	dTTP	{'C': ['P']}	139466	139466	150813	0.9248	0.9248
C10H17N2O14P3	21633	C13-label-1	dTTP	S1-00	dTTP	{'C': ['P']}	8438.33	8438.33	150813	0.056	0.056
C10H17N2O14P3	0	C13-label-10	dTTP	S1-00	dTTP	{'C': ['P']}	5.3e-09	5.3e-09	150813	0	0
C10H17N2O14P3	0	C13-label-2	dTTP	S1-00	dTTP	{'C': ['P']}	-1616.25	0	150813	0	0
C10H17N2O14P3	0	C13-label-3	dTTP	S1-00	dTTP	{'C': ['P']}	83.2059	83.2059	150813	0.0006	0.0006
C10H17N2O14P3	2639.15	C13-label-4	dTTP	S1-00	dTTP	{'C': ['P']}	2819.65	2819.65	150813	0.0187	0.0187
C10H17N2O14P3	0	C13-label-5	dTTP	S1-00	dTTP	{'C': ['P']}	-187.902	0	150813	0	0
C10H17N2O14P3	0	C13-label-6	dTTP	S1-00	dTTP	{'C': ['P']}	5.21493	5.21493	150813	0	0
C10H17N2O14P3	0	C13-label-7	dTTP	S1-00	dTTP	{'C': ['P']}	-0.0771843	0	150813	0	0
C10H17N2O14P3	0	C13-label-8	dTTP	S1-00	dTTP	{'C': ['P']}	0.000642572	0.000642572	150813	0	0
C9H13N2O8P	39317.9	PARENT	dUMP	S1-00	dUMP	{'C': ['P']}	43472.9	43472.9	45727.2	0.9507	0.9507
C9H13N2O8P	0	C13-label-1	dUMP	S1-00	dUMP	{'C': ['P']}	-4342.95	0	45727.2	0	0
C9H13N2O8P	289.441	C13-label-2	dUMP	S1-00	dUMP	{'C': ['P']}	505.79	505.79	45727.2	0.0111	0.0111
C9H13N2O8P	1659.53	C13-label-3	dUMP	S1-00	dUMP	{'C': ['P']}	1745.17	1745.17	45727.2	0.0382	0.0382
C9H13N2O8P	0	C13-label-4	dUMP	S1-00	dUMP	{'C': ['P']}	-117.288	0	45727.2	0	0
C9H13N2O8P	0	C13-label-5	dUMP	S1-00	dUMP	{'C': ['P']}	3.26361	3.26361	45727.2	0.0001	0.0001
C9H13N2O8P	0	C13-label-6	dUMP	S1-00	dUMP	{'C': ['P']}	-0.0483637	0	45727.2	0	0
C9H13N2O8P	0	C13-label-9	dUMP	S1-00	dUMP	{'C': ['P']}	3.3e-09	3.3e-09	45727.2	0	0
C18H38NO5P	49563.9	PARENT	Erythro-sphingosine 1-phosphate	S1-00	Erythro-sphingosine 1-phosphate	{'C': ['P']}	60593	60593	60593	1	1
C18H38NO5P	9797.2	C13-label-1	Erythro-sphingosine 1-phosphate	S1-00	Erythro-sphingosine 1-phosphate	{'C': ['P']}	-262.118	0	60593	0	0
C18H38NO5P	682.544	C13-label-2	Erythro-sphingosine 1-phosphate	S1-00	Erythro-sphingosine 1-phosphate	{'C': ['P']}	-276.78	0	60593	0	0
C18H38NO5P	0	C13-label-3	Erythro-sphingosine 1-phosphate	S1-00	Erythro-sphingosine 1-phosphate	{'C': ['P']}	-14.0726	0	60593	0	0
C27H33N9O15P2	35730.1	PARENT	Flavin adenine dinucleotide (FAD)	S1-00	Flavin adenine dinucleotide (FAD)	{'C': ['P']}	48296.9	48296.9	52293.5	0.9236	0.9236
C27H33N9O15P2	13699.9	C13-label-1	Flavin adenine dinucleotide (FAD)	S1-00	Flavin adenine dinucleotide (FAD)	{'C': ['P']}	3838.29	3838.29	52293.5	0.0734	0.0734
C27H33N9O15P2	0	C13-label-14	Flavin adenine dinucleotide (FAD)	S1-00	Flavin adenine dinucleotide (FAD)	{'C': ['P']}	0	0	52293.5	0	0
C27H33N9O15P2	1041.13	C13-label-2	Flavin adenine dinucleotide (FAD)	S1-00	Flavin adenine dinucleotide (FAD)	{'C': ['P']}	-1820.17	0	52293.5	0	0
C27H33N9O15P2	0	C13-label-3	Flavin adenine dinucleotide (FAD)	S1-00	Flavin adenine dinucleotide (FAD)	{'C': ['P']}	158.197	158.197	52293.5	0.003	0.003
C27H33N9O15P2	0	C13-label-4	Flavin adenine dinucleotide (FAD)	S1-00	Flavin adenine dinucleotide (FAD)	{'C': ['P']}	-1.38037	0	52293.5	0	0
C27H33N9O15P2	0	C13-label-5	Flavin adenine dinucleotide (FAD)	S1-00	Flavin adenine dinucleotide (FAD)	{'C': ['P']}	-0.829905	0	52293.5	0	0
C27H33N9O15P2	0	C13-label-6	Flavin adenine dinucleotide (FAD)	S1-00	Flavin adenine dinucleotide (FAD)	{'C': ['P']}	0.0880421	0.0880421	52293.5	0	0
C27H33N9O15P2	0	C13-label-7	Flavin adenine dinucleotide (FAD)	S1-00	Flavin adenine dinucleotide (FAD)	{'C': ['P']}	-0.00532554	0	52293.5	0	0
C19H19N7O6	83761.2	PARENT	Folic acid	S1-00	Folic acid	{'C': ['P']}	103549	103549	103549	1	1
C19H19N7O6	7785.82	C13-label-1	Folic acid	S1-00	Folic acid	{'C': ['P']}	-12320.2	0	103549	0	0
C6H13O9P	123069	PARENT	Fructose-6-phosphate	S1-00	Fructose-6-phosphate	{'C': ['P']}	131594	131594	137280	0.9586	0.9586
C6H13O9P	7502.13	C13-label-1	Fructose-6-phosphate	S1-00	Fructose-6-phosphate	{'C': ['P']}	-831.415	0	137280	0	0
C6H13O9P	1354.82	C13-label-2	Fructose-6-phosphate	S1-00	Fructose-6-phosphate	{'C': ['P']}	1219.62	1219.62	137280	0.0089	0.0089
C6H13O9P	1719.44	C13-label-3	Fructose-6-phosphate	S1-00	Fructose-6-phosphate	{'C': ['P']}	1721.27	1721.27	137280	0.0125	0.0125
C6H13O9P	0	C13-label-5	Fructose-6-phosphate	S1-00	Fructose-6-phosphate	{'C': ['P']}	0.649918	0.649918	137280	0	0
C6H13O9P	2744.26	C13-label-6	Fructose-6-phosphate	S1-00	Fructose-6-phosphate	{'C': ['P']}	2744.26	2744.26	137280	0.02	0.02
C4H4O4	660858	PARENT	fumaric acid	S1-00	fumaric acid	{'C': ['P']}	691032	691032	1.0575e+06	0.6535	0.6535
C4H4O4	197653	C13-label-1	fumaric acid	S1-00	fumaric acid	{'C': ['P']}	173702	173702	1.0575e+06	0.1643	0.1643
C4H4O4	153329	C13-label-2	fumaric acid	S1-00	fumaric acid	{'C': ['P']}	150496	150496	1.0575e+06	0.1423	0.1423
C4H4O4	36431.9	C13-label-3	fumaric acid	S1-00	fumaric acid	{'C': ['P']}	33431.8	33431.8	1.0575e+06	0.0316	0.0316
C4H4O4	9224.87	C13-label-4	fumaric acid	S1-00	fumaric acid	{'C': ['P']}	8834.99	8834.99	1.0575e+06	0.0084	0.0084
C10H15N5O11P2	913507	PARENT	GDP	S1-00	GDP	{'C': ['P']}	1.02138e+06	1.02138e+06	1.28331e+06	0.7959	0.7959
C10H15N5O11P2	146200	C13-label-1	GDP	S1-00	GDP	{'C': ['P']}	48277.2	48277.2	1.28331e+06	0.0376	0.0376
C10H15N5O11P2	0	C13-label-10	GDP	S1-00	GDP	{'C': ['P']}	-0.00295331	0	1.28331e+06	0	0
C10H15N5O11P2	63988.1	C13-label-2	GDP	S1-00	GDP	{'C': ['P']}	59479	59479	1.28331e+06	0.0463	0.0463
C10H15N5O11P2	66694.6	C13-label-3	GDP	S1-00	GDP	{'C': ['P']}	66451.2	66451.2	1.28331e+06	0.0518	0.0518
C10H15N5O11P2	26385.7	C13-label-4	GDP	S1-00	GDP	{'C': ['P']}	22836.1	22836.1	1.28331e+06	0.0178	0.0178
C10H15N5O11P2	53765.1	C13-label-5	GDP	S1-00	GDP	{'C': ['P']}	55153.5	55153.5	1.28331e+06	0.043	0.043
C10H15N5O11P2	10505.3	C13-label-6	GDP	S1-00	GDP	{'C': ['P']}	7878.49	7878.49	1.28331e+06	0.0061	0.0061
C10H15N5O11P2	2199.5	C13-label-7	GDP	S1-00	GDP	{'C': ['P']}	1855.98	1855.98	1.28331e+06	0.0014	0.0014
C10H15N5O11P2	0	C13-label-8	GDP	S1-00	GDP	{'C': ['P']}	-68.3881	0	1.28331e+06	0	0
C10H15N5O11P2	0	C13-label-9	GDP	S1-00	GDP	{'C': ['P']}	0.784881	0.784881	1.28331e+06	0	0
C7H6O4	1.46585e+07	PARENT	Gentisic acid	S1-00	Gentisic acid	{'C': ['P']}	1.58498e+07	1.58498e+07	1.58613e+07	0.9993	0.9993
C7H6O4	1.16259e+06	C13-label-1	Gentisic acid	S1-00	Gentisic acid	{'C': ['P']}	11589.9	11589.9	1.58613e+07	0.0007	0.0007
C7H6O4	20432.8	C13-label-2	Gentisic acid	S1-00	Gentisic acid	{'C': ['P']}	-20176.1	0	1.58613e+07	0	0
C6H13NO5	34760.3	PARENT	glucosamine	S1-00	glucosamine	{'C': ['P']}	37168	37168	37169.4	1	1
C6H13NO5	1852.14	C13-label-1	glucosamine	S1-00	glucosamine	{'C': ['P']}	-516.945	0	37169.4	0	0
C6H13NO5	0	C13-label-3	glucosamine	S1-00	glucosamine	{'C': ['P']}	1.39636	1.39636	37169.4	0	0
C5H8O4	77124.1	PARENT	Glutaric acid	S1-00	Glutaric acid	{'C': ['P']}	81550.8	81550.8	81550.8	1	1
C5H8O4	0	C13-label-1	Glutaric acid	S1-00	Glutaric acid	{'C': ['P']}	-4526.07	0	81550.8	0	0
C3H9O6P	325446	PARENT	Glycerol 3-phosphate	S1-00	Glycerol 3-phosphate	{'C': ['P']}	336529	336529	358624	0.9384	0.9384
C3H9O6P	11846.3	C13-label-1	Glycerol 3-phosphate	S1-00	Glycerol 3-phosphate	{'C': ['P']}	907.334	907.334	358624	0.0025	0.0025
C3H9O6P	3471.24	C13-label-2	Glycerol 3-phosphate	S1-00	Glycerol 3-phosphate	{'C': ['P']}	3365.67	3365.67	358624	0.0094	0.0094
C3H9O6P	17860.5	C13-label-3	Glycerol 3-phosphate	S1-00	Glycerol 3-phosphate	{'C': ['P']}	17822.6	17822.6	358624	0.0497	0.0497
C10H14N5O8P	946552	PARENT	GMP	S1-00	GMP	{'C': ['P']}	1.05833e+06	1.05833e+06	1.45517e+06	0.7273	0.7273
C10H14N5O8P	167564	C13-label-1	GMP	S1-00	GMP	{'C': ['P']}	67797.2	67797.2	1.45517e+06	0.0466	0.0466
C10H14N5O8P	0	C13-label-10	GMP	S1-00	GMP	{'C': ['P']}	0.0479921	0.0479921	1.45517e+06	0	0
C10H14N5O8P	99239.3	C13-label-2	GMP	S1-00	GMP	{'C': ['P']}	95868	95868	1.45517e+06	0.0659	0.0659
C10H14N5O8P	101695	C13-label-3	GMP	S1-00	GMP	{'C': ['P']}	100973	100973	1.45517e+06	0.0694	0.0694
C10H14N5O8P	44332.8	C13-label-4	GMP	S1-00	GMP	{'C': ['P']}	39216.1	39216.1	1.45517e+06	0.0269	0.0269
C10H14N5O8P	79101.8	C13-label-5	GMP	S1-00	GMP	{'C': ['P']}	80761.4	80761.4	1.45517e+06	0.0555	0.0555
C10H14N5O8P	13012.4	C13-label-6	GMP	S1-00	GMP	{'C': ['P']}	9046.83	9046.83	1.45517e+06	0.0062	0.0062
C10H14N5O8P	3252.9	C13-label-7	GMP	S1-00	GMP	{'C': ['P']}	2861.36	2861.36	1.45517e+06	0.002	0.002
C10H14N5O8P	415.9	C13-label-8	GMP	S1-00	GMP	{'C': ['P']}	322.204	322.204	1.45517e+06	0.0002	0.0002
C10H14N5O8P	0	C13-label-9	GMP	S1-00	GMP	{'C': ['P']}	-8.26623	0	1.45517e+06	0	0
C10H16N5O14P3	11770.9	PARENT	GTP	S1-00	GTP	{'C': ['P']}	13160.9	13160.9	14077	0.9349	0.9349
C10H16N5O14P3	2142.17	C13-label-1	GTP	S1-00	GTP	{'C': ['P']}	907.693	907.693	14077	0.0645	0.0645
C10H16N5O14P3	0	C13-label-2	GTP	S1-00	GTP	{'C': ['P']}	-163.649	0	14077	0	0
C10H16N5O14P3	0	C13-label-3	GTP	S1-00	GTP	{'C': ['P']}	8.34596	8.34596	14077	0.0006	0.0006
C10H16N5O14P3	0	C13-label-4	GTP	S1-00	GTP	{'C': ['P']}	-0.230146	0	14077	0	0
C10H16N5O14P3	0	C13-label-5	GTP	S1-00	GTP	{'C': ['P']}	0.00397164	0.00397164	14077	0	0
C10H16N5O14P3	0	C13-label-6	GTP	S1-00	GTP	{'C': ['P']}	-4.51191e-05	0	14077	0	0
C10H16N5O14P3	0	C13-label-7	GTP	S1-00	GTP	{'C': ['P']}	3.393e-07	3.393e-07	14077	0	0
C13H25NO4	619319	PARENT	Hexanoylcarnitine	S1-00	Hexanoylcarnitine	{'C': ['P']}	716034	716034	728835	0.9824	0.9824
C13H25NO4	73531.1	C13-label-1	Hexanoylcarnitine	S1-00	Hexanoylcarnitine	{'C': ['P']}	-19253.3	0	728835	0	0
C13H25NO4	15140.6	C13-label-2	Hexanoylcarnitine	S1-00	Hexanoylcarnitine	{'C': ['P']}	12801.8	12801.8	728835	0.0176	0.0176
C6H6O2	726360	PARENT	Hydroquinone	S1-00	Hydroquinone	{'C': ['P']}	776673	776673	776673	1	1
C6H6O2	39816	C13-label-1	Hydroquinone	S1-00	Hydroquinone	{'C': ['P']}	-9625.03	0	776673	0	0
C6H6O2	0	C13-label-2	Hydroquinone	S1-00	Hydroquinone	{'C': ['P']}	-901.218	0	776673	0	0
C2H7NO2S	71501.1	PARENT	Hypotaurine	S1-00	Hypotaurine	{'C': ['P']}	73115.3	73115.3	73115.3	1	1
C2H7NO2S	0	C13-label-1	Hypotaurine	S1-00	Hypotaurine	{'C': ['P']}	-1623.16	0	73115.3	0	0
C5H4N4O	69080	PARENT	Hypoxanthine	S1-00	Hypoxanthine	{'C': ['P']}	73045	73045	73095.5	0.9993	0.9993
C5H4N4O	851.936	C13-label-1	Hypoxanthine	S1-00	Hypoxanthine	{'C': ['P']}	-3163.16	0	73095.5	0	0
C5H4N4O	0	C13-label-2	Hypoxanthine	S1-00	Hypoxanthine	{'C': ['P']}	50.4457	50.4457	73095.5	0.0007	0.0007
C10H13N4O8P	504817	PARENT	IMP	S1-00	IMP	{'C': ['P']}	564431	564431	675541	0.8355	0.8355
C10H13N4O8P	68036.5	C13-label-1	IMP	S1-00	IMP	{'C': ['P']}	12574.6	12574.6	675541	0.0186	0.0186
C10H13N4O8P	31740	C13-label-2	IMP	S1-00	IMP	{'C': ['P']}	30319	30319	675541	0.0449	0.0449
C10H13N4O8P	38227.5	C13-label-3	IMP	S1-00	IMP	{'C': ['P']}	38493.5	38493.5	675541	0.057	0.057
C10H13N4O8P	11511.6	C13-label-4	IMP	S1-00	IMP	{'C': ['P']}	9210.22	9210.22	675541	0.0136	0.0136
C10H13N4O8P	19012.2	C13-label-5	IMP	S1-00	IMP	{'C': ['P']}	19388	19388	675541	0.0287	0.0287
C10H13N4O8P	2121.72	C13-label-6	IMP	S1-00	IMP	{'C': ['P']}	1123.67	1123.67	675541	0.0017	0.0017
C10H13N4O8P	0	C13-label-7	IMP	S1-00	IMP	{'C': ['P']}	-74.0514	0	675541	0	0
C10H13N4O8P	0	C13-label-8	IMP	S1-00	IMP	{'C': ['P']}	1.36784	1.36784	675541	0	0
C10H13N4O8P	0	C13-label-9	IMP	S1-00	IMP	{'C': ['P']}	-0.0106229	0	675541	0	0
C8H7N	43449.2	PARENT	indole	S1-00	indole	{'C': ['P']}	47507.6	47507.6	47509.5	1	1
C8H7N	1991.67	C13-label-1	indole	S1-00	indole	{'C': ['P']}	-2065.14	0	47509.5	0	0
C8H7N	0	C13-label-3	indole	S1-00	indole	{'C': ['P']}	1.93359	1.93359	47509.5	0	0
C10H12N4O5	86378.1	PARENT	inosine	S1-00	inosine	{'C': ['P']}	96578.4	96578.4	109780	0.8797	0.8797
C10H12N4O5	9891.4	C13-label-1	inosine	S1-00	inosine	{'C': ['P']}	216.504	216.504	109780	0.002	0.002
C10H12N4O5	4594.02	C13-label-2	inosine	S1-00	inosine	{'C': ['P']}	4466.02	4466.02	109780	0.0407	0.0407
C10H12N4O5	4406.28	C13-label-3	inosine	S1-00	inosine	{'C': ['P']}	4350.97	4350.97	109780	0.0396	0.0396
C10H12N4O5	2356.28	C13-label-4	inosine	S1-00	inosine	{'C': ['P']}	2165.68	2165.68	109780	0.0197	0.0197
C10H12N4O5	2038.38	C13-label-5	inosine	S1-00	inosine	{'C': ['P']}	1999.54	1999.54	109780	0.0182	0.0182
C10H12N4O5	0	C13-label-6	inosine	S1-00	inosine	{'C': ['P']}	-115.19	0	109780	0	0
C10H12N4O5	0	C13-label-7	inosine	S1-00	inosine	{'C': ['P']}	2.58921	2.58921	109780	0	0
C10H12N4O5	0	C13-label-8	inosine	S1-00	inosine	{'C': ['P']}	-0.0289205	0	109780	0	0
C5H6O4	1.20741e+06	PARENT	Itaconic acid	S1-00	Itaconic acid	{'C': ['P']}	1.27671e+06	1.27671e+06	1.28234e+06	0.9956	0.9956
C5H6O4	69526.7	C13-label-1	Itaconic acid	S1-00	Itaconic acid	{'C': ['P']}	1843.8	1843.8	1.28234e+06	0.0014	0.0014
C5H6O4	5255.31	C13-label-2	Itaconic acid	S1-00	Itaconic acid	{'C': ['P']}	3779.37	3779.37	1.28234e+06	0.0029	0.0029
C5H6O4	0	C13-label-3	Itaconic acid	S1-00	Itaconic acid	{'C': ['P']}	-144.677	0	1.28234e+06	0	0
C5H6O4	0	C13-label-4	Itaconic acid	S1-00	Itaconic acid	{'C': ['P']}	1.70786	1.70786	1.28234e+06	0	0
C5H6O4	0	C13-label-5	Itaconic acid	S1-00	Itaconic acid	{'C': ['P']}	-0.00654355	0	1.28234e+06	0	0
C3H6O3	1.87279e+07	PARENT	lactate	S1-00	lactate	{'C': ['P']}	1.93656e+07	1.93656e+07	2.03971e+07	0.9494	0.9494
C3H6O3	865123	C13-label-1	lactate	S1-00	lactate	{'C': ['P']}	239778	239778	2.03971e+07	0.0118	0.0118
C3H6O3	154741	C13-label-2	lactate	S1-00	lactate	{'C': ['P']}	143996	143996	2.03971e+07	0.0071	0.0071
C3H6O3	649381	C13-label-3	lactate	S1-00	lactate	{'C': ['P']}	647727	647727	2.03971e+07	0.0318	0.0318
C3H7NO2	2.95972e+06	PARENT	L-Alanine	S1-00	L-Alanine	{'C': ['P']}	3.06051e+06	3.06051e+06	4.10811e+06	0.745	0.745
C3H7NO2	293400	C13-label-1	L-Alanine	S1-00	L-Alanine	{'C': ['P']}	198108	198108	4.10811e+06	0.0482	0.0482
C3H7NO2	172296	C13-label-2	L-Alanine	S1-00	L-Alanine	{'C': ['P']}	168700	168700	4.10811e+06	0.0411	0.0411
C3H7NO2	682693	C13-label-3	L-Alanine	S1-00	L-Alanine	{'C': ['P']}	680792	680792	4.10811e+06	0.1657	0.1657
C4H8N2O3	2.3553e+06	PARENT	L-Asparagine	S1-00	L-Asparagine	{'C': ['P']}	2.46284e+06	2.46284e+06	2.53289e+06	0.9723	0.9723
C4H8N2O3	144327	C13-label-1	L-Asparagine	S1-00	L-Asparagine	{'C': ['P']}	39892.1	39892.1	2.53289e+06	0.0157	0.0157
C4H8N2O3	25273.6	C13-label-2	L-Asparagine	S1-00	L-Asparagine	{'C': ['P']}	22695	22695	2.53289e+06	0.009	0.009
C4H8N2O3	7907.65	C13-label-3	L-Asparagine	S1-00	L-Asparagine	{'C': ['P']}	7464.37	7464.37	2.53289e+06	0.0029	0.0029
C4H7NO4	2.60884e+06	PARENT	L-Aspartic acid	S1-00	L-Aspartic acid	{'C': ['P']}	2.72796e+06	2.72796e+06	4.25198e+06	0.6416	0.6416
C4H7NO4	789238	C13-label-1	L-Aspartic acid	S1-00	L-Aspartic acid	{'C': ['P']}	694993	694993	4.25198e+06	0.1635	0.1635
C4H7NO4	650473	C13-label-2	L-Aspartic acid	S1-00	L-Aspartic acid	{'C': ['P']}	639997	639997	4.25198e+06	0.1505	0.1505
C4H7NO4	165864	C13-label-3	L-Aspartic acid	S1-00	L-Aspartic acid	{'C': ['P']}	153246	153246	4.25198e+06	0.036	0.036
C4H7NO4	37567	C13-label-4	L-Aspartic acid	S1-00	L-Aspartic acid	{'C': ['P']}	35786.1	35786.1	4.25198e+06	0.0084	0.0084
C7H15NO3	7.36326e+07	PARENT	L-Carnitine	S1-00	L-Carnitine	{'C': ['P']}	7.96166e+07	7.96166e+07	7.98124e+07	0.9975	0.9975
C7H15NO3	5.96818e+06	C13-label-1	L-Carnitine	S1-00	L-Carnitine	{'C': ['P']}	195362	195362	7.98124e+07	0.0024	0.0024
C7H15NO3	129401	C13-label-2	L-Carnitine	S1-00	L-Carnitine	{'C': ['P']}	-82184	0	7.98124e+07	0	0
C7H15NO3	0	C13-label-3	L-Carnitine	S1-00	L-Carnitine	{'C': ['P']}	389.138	389.138	7.98124e+07	0	0
C6H13N3O3	876683	PARENT	L-Citrulline	S1-00	L-Citrulline	{'C': ['P']}	937407	937407	1.04283e+06	0.8989	0.8989
C6H13N3O3	136211	C13-label-1	L-Citrulline	S1-00	L-Citrulline	{'C': ['P']}	81597.9	81597.9	1.04283e+06	0.0782	0.0782
C6H13N3O3	20082.2	C13-label-2	L-Citrulline	S1-00	L-Citrulline	{'C': ['P']}	14738	14738	1.04283e+06	0.0141	0.0141
C6H13N3O3	8036.05	C13-label-3	L-Citrulline	S1-00	L-Citrulline	{'C': ['P']}	7529.15	7529.15	1.04283e+06	0.0072	0.0072
C6H13N3O3	954.599	C13-label-4	L-Citrulline	S1-00	L-Citrulline	{'C': ['P']}	713.204	713.204	1.04283e+06	0.0007	0.0007
C6H13N3O3	850.878	C13-label-5	L-Citrulline	S1-00	L-Citrulline	{'C': ['P']}	841.725	841.725	1.04283e+06	0.0008	0.0008
C6H13N3O3	0	C13-label-6	L-Citrulline	S1-00	L-Citrulline	{'C': ['P']}	-9.44156	0	1.04283e+06	0	0
C5H9NO4	8.11181e+06	PARENT	L-Glutamic acid	S1-00	L-Glutamic acid	{'C': ['P']}	8.5774e+06	8.5774e+06	1.2803e+07	0.67	0.67
C5H9NO4	1.90334e+06	C13-label-1	L-Glutamic acid	S1-00	L-Glutamic acid	{'C': ['P']}	1.51421e+06	1.51421e+06	1.2803e+07	0.1183	0.1183
C5H9NO4	1.87848e+06	C13-label-2	L-Glutamic acid	S1-00	L-Glutamic acid	{'C': ['P']}	1.86465e+06	1.86465e+06	1.2803e+07	0.1456	0.1456
C5H9NO4	650533	C13-label-3	L-Glutamic acid	S1-00	L-Glutamic acid	{'C': ['P']}	601889	601889	1.2803e+07	0.047	0.047
C5H9NO4	209012	C13-label-4	L-Glutamic acid	S1-00	L-Glutamic acid	{'C': ['P']}	197298	197298	1.2803e+07	0.0154	0.0154
C5H9NO4	49870.6	C13-label-5	L-Glutamic acid	S1-00	L-Glutamic acid	{'C': ['P']}	47603.8	47603.8	1.2803e+07	0.0037	0.0037
C5H10N2O3	4.34678e+06	PARENT	L-Glutamine	S1-00	L-Glutamine	{'C': ['P']}	4.59627e+06	4.59627e+06	6.50796e+06	0.7063	0.7063
C5H10N2O3	1.19198e+06	C13-label-1	L-Glutamine	S1-00	L-Glutamine	{'C': ['P']}	991317	991317	6.50796e+06	0.1523	0.1523
C5H10N2O3	619016	C13-label-2	L-Glutamine	S1-00	L-Glutamine	{'C': ['P']}	590418	590418	6.50796e+06	0.0907	0.0907
C5H10N2O3	248401	C13-label-3	L-Glutamine	S1-00	L-Glutamine	{'C': ['P']}	233553	233553	6.50796e+06	0.0359	0.0359
C5H10N2O3	78074	C13-label-4	L-Glutamine	S1-00	L-Glutamine	{'C': ['P']}	73541.5	73541.5	6.50796e+06	0.0113	0.0113
C5H10N2O3	23705.9	C13-label-5	L-Glutamine	S1-00	L-Glutamine	{'C': ['P']}	22860	22860	6.50796e+06	0.0035	0.0035
C10H17N3O6S	9.42677e+06	PARENT	L-Glutathione (reduced)	S1-00	L-Glutathione (reduced)	{'C': ['P']}	1.054e+07	1.054e+07	1.06365e+07	0.9909	0.9909
C10H17N3O6S	1.04351e+06	C13-label-1	L-Glutathione (reduced)	S1-00	L-Glutathione (reduced)	{'C': ['P']}	-16149.3	0	1.06365e+07	0	0
C10H17N3O6S	126301	C13-label-2	L-Glutathione (reduced)	S1-00	L-Glutathione (reduced)	{'C': ['P']}	81273.4	81273.4	1.06365e+07	0.0076	0.0076
C10H17N3O6S	16115.5	C13-label-3	L-Glutathione (reduced)	S1-00	L-Glutathione (reduced)	{'C': ['P']}	8549.93	8549.93	1.06365e+07	0.0008	0.0008
C10H17N3O6S	7214.62	C13-label-4	L-Glutathione (reduced)	S1-00	L-Glutathione (reduced)	{'C': ['P']}	6737.89	6737.89	1.06365e+07	0.0006	0.0006
C10H17N3O6S	0	C13-label-5	L-Glutathione (reduced)	S1-00	L-Glutathione (reduced)	{'C': ['P']}	-477.507	0	1.06365e+07	0	0
C10H17N3O6S	0	C13-label-6	L-Glutathione (reduced)	S1-00	L-Glutathione (reduced)	{'C': ['P']}	13.5496	13.5496	1.06365e+07	0	0
C20H32N6O12S2	738932	PARENT	L-Glutathione oxidized	S1-00	L-Glutathione oxidized	{'C': ['P']}	923756	923756	950898	0.9715	0.9715
C20H32N6O12S2	157489	C13-label-1	L-Glutathione oxidized	S1-00	L-Glutathione oxidized	{'C': ['P']}	-10379.1	0	950898	0	0
C20H32N6O12S2	34677.4	C13-label-2	L-Glutathione oxidized	S1-00	L-Glutathione oxidized	{'C': ['P']}	22957.9	22957.9	950898	0.0241	0.0241
C20H32N6O12S2	4957.15	C13-label-3	L-Glutathione oxidized	S1-00	L-Glutathione oxidized	{'C': ['P']}	184.425	184.425	950898	0.0002	0.0002
C20H32N6O12S2	3097.28	C13-label-4	L-Glutathione oxidized	S1-00	L-Glutathione oxidized	{'C': ['P']}	3181.13	3181.13	950898	0.0033	0.0033
C20H32N6O12S2	1183.23	C13-label-5	L-Glutathione oxidized	S1-00	L-Glutathione oxidized	{'C': ['P']}	803.402	803.402	950898	0.0008	0.0008
C20H32N6O12S2	0	C13-label-6	L-Glutathione oxidized	S1-00	L-Glutathione oxidized	{'C': ['P']}	-182.085	0	950898	0	0
C20H32N6O12S2	0	C13-label-7	L-Glutathione oxidized	S1-00	L-Glutathione oxidized	{'C': ['P']}	15.4252	15.4252	950898	0	0
C20H32N6O12S2	0	C13-label-8	L-Glutathione oxidized	S1-00	L-Glutathione oxidized	{'C': ['P']}	-0.773134	0	950898	0	0
C2H5NO2	301366	PARENT	L-Glycine	S1-00	L-Glycine	{'C': ['P']}	308170	308170	322849	0.9545	0.9545
C2H5NO2	7041.98	C13-label-1	L-Glycine	S1-00	L-Glycine	{'C': ['P']}	279.657	279.657	322849	0.0009	0.0009
C2H5NO2	14440.5	C13-label-2	L-Glycine	S1-00	L-Glycine	{'C': ['P']}	14399.4	14399.4	322849	0.0446	0.0446
C6H9N3O2	1.27617e+06	PARENT	L-Histidine	S1-00	L-Histidine	{'C': ['P']}	1.36457e+06	1.36457e+06	1.36457e+06	1	1
C6H9N3O2	75095	C13-label-1	L-Histidine	S1-00	L-Histidine	{'C': ['P']}	-11474.8	0	1.36457e+06	0	0
C6H9N3O2	0	C13-label-2	L-Histidine	S1-00	L-Histidine	{'C': ['P']}	-1885.07	0	1.36457e+06	0	0
C6H13NO2	2.01392e+06	PARENT	L-Isoleucine	S1-00	L-Isoleucine	{'C': ['P']}	2.15342e+06	2.15342e+06	2.15342e+06	1	1
C6H13NO2	129286	C13-label-1	L-Isoleucine	S1-00	L-Isoleucine	{'C': ['P']}	-6710.57	0	2.15342e+06	0	0
C6H13NO2	1654.8	C13-label-2	L-Isoleucine	S1-00	L-Isoleucine	{'C': ['P']}	-1877.04	0	2.15342e+06	0	0
C6H13NO2	3.44857e+06	PARENT	L-Leucine	S1-00	L-Leucine	{'C': ['P']}	3.68744e+06	3.68744e+06	3.68744e+06	1	1
C6H13NO2	219437	C13-label-1	L-Leucine	S1-00	L-Leucine	{'C': ['P']}	-13551.9	0	3.68744e+06	0	0
C6H13NO2	4265.95	C13-label-2	L-Leucine	S1-00	L-Leucine	{'C': ['P']}	-1602.08	0	3.68744e+06	0	0
C6H14N2O2	3.76187e+06	PARENT	L-Lysine	S1-00	L-Lysine	{'C': ['P']}	4.02244e+06	4.02244e+06	4.03072e+06	0.9979	0.9979
C6H14N2O2	261181	C13-label-1	L-Lysine	S1-00	L-Lysine	{'C': ['P']}	8277.69	8277.69	4.03072e+06	0.0021	0.0021
C6H14N2O2	4286.12	C13-label-2	L-Lysine	S1-00	L-Lysine	{'C': ['P']}	-3411.66	0	4.03072e+06	0	0
C9H11NO2	2.26131e+06	PARENT	L-Phenylalanine	S1-00	L-Phenylalanine	{'C': ['P']}	2.50028e+06	2.50028e+06	2.50028e+06	1	1
C9H11NO2	209825	C13-label-1	L-Phenylalanine	S1-00	L-Phenylalanine	{'C': ['P']}	-20355	0	2.50028e+06	0	0
C9H11NO2	6999.87	C13-label-2	L-Phenylalanine	S1-00	L-Phenylalanine	{'C': ['P']}	-1713.91	0	2.50028e+06	0	0
C9H11NO2	0	C13-label-8	L-Phenylalanine	S1-00	L-Phenylalanine	{'C': ['P']}	6.63e-08	6.63e-08	2.50028e+06	0	0
C5H9NO2	3.66539e+07	PARENT	L-Proline	S1-00	L-Proline	{'C': ['P']}	3.87578e+07	3.87578e+07	4.71115e+07	0.8227	0.8227
C5H9NO2	4.64216e+06	C13-label-1	L-Proline	S1-00	L-Proline	{'C': ['P']}	2.70307e+06	2.70307e+06	4.71115e+07	0.0574	0.0574
C5H9NO2	3.95274e+06	C13-label-2	L-Proline	S1-00	L-Proline	{'C': ['P']}	3.91958e+06	3.91958e+06	4.71115e+07	0.0832	0.0832
C5H9NO2	1.24924e+06	C13-label-3	L-Proline	S1-00	L-Proline	{'C': ['P']}	1.14439e+06	1.14439e+06	4.71115e+07	0.0243	0.0243
C5H9NO2	507002	C13-label-4	L-Proline	S1-00	L-Proline	{'C': ['P']}	485821	485821	4.71115e+07	0.0103	0.0103
C5H9NO2	106440	C13-label-5	L-Proline	S1-00	L-Proline	{'C': ['P']}	100901	100901	4.71115e+07	0.0021	0.0021
C3H7NO3	1.27825e+06	PARENT	L-Serine	S1-00	L-Serine	{'C': ['P']}	1.32177e+06	1.32177e+06	1.39278e+06	0.949	0.949
C3H7NO3	78509.5	C13-label-1	L-Serine	S1-00	L-Serine	{'C': ['P']}	36266.9	36266.9	1.39278e+06	0.026	0.026
C3H7NO3	27237.8	C13-label-2	L-Serine	S1-00	L-Serine	{'C': ['P']}	26249.9	26249.9	1.39278e+06	0.0188	0.0188
C3H7NO3	8785.78	C13-label-3	L-Serine	S1-00	L-Serine	{'C': ['P']}	8488.13	8488.13	1.39278e+06	0.0061	0.0061
C4H8O5	1.17859e+06	PARENT	L-Threonic acid	S1-00	L-Threonic acid	{'C': ['P']}	1.2324e+06	1.2324e+06	1.24621e+06	0.9889	0.9889
C4H8O5	57311.7	C13-label-1	L-Threonic acid	S1-00	L-Threonic acid	{'C': ['P']}	4544.72	4544.72	1.24621e+06	0.0036	0.0036
C4H8O5	2796.84	C13-label-2	L-Threonic acid	S1-00	L-Threonic acid	{'C': ['P']}	1797.58	1797.58	1.24621e+06	0.0014	0.0014
C4H8O5	7466.46	C13-label-4	L-Threonic acid	S1-00	L-Threonic acid	{'C': ['P']}	7466.75	7466.75	1.24621e+06	0.006	0.006
C4H9NO3	4.02186e+06	PARENT	L-Threonine	S1-00	L-Threonine	{'C': ['P']}	4.2055e+06	4.2055e+06	4.2055e+06	1	1
C4H9NO3	169995	C13-label-1	L-Threonine	S1-00	L-Threonine	{'C': ['P']}	-10941	0	4.2055e+06	0	0
C4H9NO3	742.434	C13-label-2	L-Threonine	S1-00	L-Threonine	{'C': ['P']}	-1985.43	0	4.2055e+06	0	0
C11H12N2O2	385046	PARENT	L-Tryptophan	S1-00	L-Tryptophan	{'C': ['P']}	435348	435348	437468	0.9952	0.9952
C11H12N2O2	39501.4	C13-label-1	L-Tryptophan	S1-00	L-Tryptophan	{'C': ['P']}	-8989.92	0	437468	0	0
C11H12N2O2	0	C13-label-11	L-Tryptophan	S1-00	L-Tryptophan	{'C': ['P']}	0.260645	0.260645	437468	0	0
C11H12N2O2	1293.95	C13-label-2	L-Tryptophan	S1-00	L-Tryptophan	{'C': ['P']}	-521.587	0	437468	0	0
C11H12N2O2	0	C13-label-3	L-Tryptophan	S1-00	L-Tryptophan	{'C': ['P']}	3.71042	3.71042	437468	0	0
C11H12N2O2	0	C13-label-8	L-Tryptophan	S1-00	L-Tryptophan	{'C': ['P']}	1.314e-07	1.314e-07	437468	0	0
C11H12N2O2	2068.75	C13-label-9	L-Tryptophan	S1-00	L-Tryptophan	{'C': ['P']}	2115.45	2115.45	437468	0.0048	0.0048
C9H11NO3	230831	PARENT	L-Tyrosine	S1-00	L-Tyrosine	{'C': ['P']}	255225	255225	255631	0.9984	0.9984
C9H11NO3	402.07	C13-label-8	L-Tyrosine	S1-00	L-Tyrosine	{'C': ['P']}	406.583	406.583	255631	0.0016	0.0016
C5H11NO2	756530	PARENT	L-Valine	S1-00	L-Valine	{'C': ['P']}	799952	799952	799952	1	1
C5H11NO2	38326.9	C13-label-1	L-Valine	S1-00	L-Valine	{'C': ['P']}	-4320.44	0	799952	0	0
C5H11NO2	552.23	C13-label-2	L-Valine	S1-00	L-Valine	{'C': ['P']}	-222.759	0	799952	0	0
C4H6O5	5.48911e+06	PARENT	Malic acid	S1-00	Malic acid	{'C': ['P']}	5.73975e+06	5.73975e+06	7.93787e+06	0.7231	0.7231
C4H6O5	1.59285e+06	C13-label-1	Malic acid	S1-00	Malic acid	{'C': ['P']}	1.39225e+06	1.39225e+06	7.93787e+06	0.1754	0.1754
C4H6O5	818353	C13-label-2	Malic acid	S1-00	Malic acid	{'C': ['P']}	786222	786222	7.93787e+06	0.099	0.099
C4H6O5	13964.7	C13-label-3	Malic acid	S1-00	Malic acid	{'C': ['P']}	-3878.69	0	7.93787e+06	0	0
C4H6O5	19705.7	C13-label-4	Malic acid	S1-00	Malic acid	{'C': ['P']}	19649.9	19649.9	7.93787e+06	0.0025	0.0025
C3H4O4	138760	PARENT	malonic acid	S1-00	malonic acid	{'C': ['P']}	143486	143486	148616	0.9655	0.9655
C3H4O4	7474.91	C13-label-1	malonic acid	S1-00	malonic acid	{'C': ['P']}	2865.58	2865.58	148616	0.0193	0.0193
C3H4O4	2354.85	C13-label-2	malonic acid	S1-00	malonic acid	{'C': ['P']}	2264.63	2264.63	148616	0.0152	0.0152
C3H4O4	0	C13-label-3	malonic acid	S1-00	malonic acid	{'C': ['P']}	-25.6866	0	148616	0	0
C5H11NO2S	257593	PARENT	methionine	S1-00	methionine	{'C': ['P']}	272378	272378	272378	1	1
C5H11NO2S	9722.35	C13-label-1	methionine	S1-00	methionine	{'C': ['P']}	-4950.73	0	272378	0	0
C5H11NO2S	0	C13-label-4	methionine	S1-00	methionine	{'C': ['P']}	-0.0349404	0	272378	0	0
C5H8O4	94905.1	PARENT	Methylsuccinic acid	S1-00	Methylsuccinic acid	{'C': ['P']}	100352	100352	100476	0.9988	0.9988
C5H8O4	0	C13-label-1	Methylsuccinic acid	S1-00	Methylsuccinic acid	{'C': ['P']}	-5569.56	0	100476	0	0
C5H8O4	0	C13-label-2	Methylsuccinic acid	S1-00	Methylsuccinic acid	{'C': ['P']}	123.644	123.644	100476	0.0012	0.0012
C5H8O4	0	C13-label-5	Methylsuccinic acid	S1-00	Methylsuccinic acid	{'C': ['P']}	-1.691e-05	0	100476	0	0
C6H12O6	162340	PARENT	Myoinositol	S1-00	Myoinositol	{'C': ['P']}	173584	173584	173584	1	1
C6H12O6	6831.61	C13-label-1	Myoinositol	S1-00	Myoinositol	{'C': ['P']}	-4336.98	0	173584	0	0
C6H12O6	0	C13-label-6	Myoinositol	S1-00	Myoinositol	{'C': ['P']}	-8.926e-07	0	173584	0	0
C8H18N4O2	3.87648e+06	PARENT	N3,N4-Dimethyl-L-arginine	S1-00	N3,N4-Dimethyl-L-arginine	{'C': ['P']}	4.23856e+06	4.23856e+06	4.23876e+06	1	1
C8H18N4O2	340951	C13-label-1	N3,N4-Dimethyl-L-arginine	S1-00	N3,N4-Dimethyl-L-arginine	{'C': ['P']}	-7725.18	0	4.23876e+06	0	0
C8H18N4O2	6123.94	C13-label-2	N3,N4-Dimethyl-L-arginine	S1-00	N3,N4-Dimethyl-L-arginine	{'C': ['P']}	-7474.16	0	4.23876e+06	0	0
C8H18N4O2	0	C13-label-3	N3,N4-Dimethyl-L-arginine	S1-00	N3,N4-Dimethyl-L-arginine	{'C': ['P']}	193.147	193.147	4.23876e+06	0	0
C8H18N4O2	0	C13-label-4	N3,N4-Dimethyl-L-arginine	S1-00	N3,N4-Dimethyl-L-arginine	{'C': ['P']}	-1.04062	0	4.23876e+06	0	0
C9H20N2O2	1.16444e+06	PARENT	N6,N6,N6-Trimethyl-L-lysine	S1-00	N6,N6,N6-Trimethyl-L-lysine	{'C': ['P']}	1.28749e+06	1.28749e+06	1.28932e+06	0.9986	0.9986
C9H20N2O2	93370.6	C13-label-1	N6,N6,N6-Trimethyl-L-lysine	S1-00	N6,N6,N6-Trimethyl-L-lysine	{'C': ['P']}	-26528.6	0	1.28932e+06	0	0
C9H20N2O2	2078.52	C13-label-2	N6,N6,N6-Trimethyl-L-lysine	S1-00	N6,N6,N6-Trimethyl-L-lysine	{'C': ['P']}	-1107.58	0	1.28932e+06	0	0
C9H20N2O2	1785.62	C13-label-7	N6,N6,N6-Trimethyl-L-lysine	S1-00	N6,N6,N6-Trimethyl-L-lysine	{'C': ['P']}	1825.93	1825.93	1.28932e+06	0.0014	0.0014
C8H16NO9P	82149.2	PARENT	N-Acetyl-a-D-glucosamine 1-phosphate	S1-00	N-Acetyl-a-D-glucosamine 1-phosphate	{'C': ['P']}	89822.3	89822.3	100386	0.8948	0.8948
C8H16NO9P	9864.24	C13-label-1	N-Acetyl-a-D-glucosamine 1-phosphate	S1-00	N-Acetyl-a-D-glucosamine 1-phosphate	{'C': ['P']}	2689.67	2689.67	100386	0.0268	0.0268
C8H16NO9P	2534.09	C13-label-3	N-Acetyl-a-D-glucosamine 1-phosphate	S1-00	N-Acetyl-a-D-glucosamine 1-phosphate	{'C': ['P']}	2700.25	2700.25	100386	0.0269	0.0269
C8H16NO9P	0	C13-label-5	N-Acetyl-a-D-glucosamine 1-phosphate	S1-00	N-Acetyl-a-D-glucosamine 1-phosphate	{'C': ['P']}	3.30627	3.30627	100386	0	0
C8H16NO9P	3937.07	C13-label-6	N-Acetyl-a-D-glucosamine 1-phosphate	S1-00	N-Acetyl-a-D-glucosamine 1-phosphate	{'C': ['P']}	4025.91	4025.91	100386	0.0401	0.0401
C8H16NO9P	0	C13-label-7	N-Acetyl-a-D-glucosamine 1-phosphate	S1-00	N-Acetyl-a-D-glucosamine 1-phosphate	{'C': ['P']}	-89.3759	0	100386	0	0
C8H16NO9P	1144.05	C13-label-8	N-Acetyl-a-D-glucosamine 1-phosphate	S1-00	N-Acetyl-a-D-glucosamine 1-phosphate	{'C': ['P']}	1144.55	1144.55	100386	0.0114	0.0114
C6H10N2O4	33947.7	PARENT	N-Acetylasparagine	S1-00	N-Acetylasparagine	{'C': ['P']}	36299.1	36299.1	38617	0.94	0.94
C6H10N2O4	3680.08	C13-label-1	N-Acetylasparagine	S1-00	N-Acetylasparagine	{'C': ['P']}	1473.78	1473.78	38617	0.0382	0.0382
C6H10N2O4	948.952	C13-label-2	N-Acetylasparagine	S1-00	N-Acetylasparagine	{'C': ['P']}	843.4	843.4	38617	0.0218	0.0218
C6H10N2O4	0	C13-label-3	N-Acetylasparagine	S1-00	N-Acetylasparagine	{'C': ['P']}	-40.2557	0	38617	0	0
C6H10N2O4	0	C13-label-4	N-Acetylasparagine	S1-00	N-Acetylasparagine	{'C': ['P']}	0.688601	0.688601	38617	0	0
C5H9NO4	640792	PARENT	N-Acetyl-DL-serine	S1-00	N-Acetyl-DL-serine	{'C': ['P']}	677572	677572	779921	0.8688	0.8688
C5H9NO4	48786.4	C13-label-1	N-Acetyl-DL-serine	S1-00	N-Acetyl-DL-serine	{'C': ['P']}	13408.7	13408.7	779921	0.0172	0.0172
C5H9NO4	78251.5	C13-label-2	N-Acetyl-DL-serine	S1-00	N-Acetyl-DL-serine	{'C': ['P']}	79486	79486	779921	0.1019	0.1019
C5H9NO4	7978.79	C13-label-3	N-Acetyl-DL-serine	S1-00	N-Acetyl-DL-serine	{'C': ['P']}	5492.85	5492.85	779921	0.007	0.007
C5H9NO4	1432.92	C13-label-4	N-Acetyl-DL-serine	S1-00	N-Acetyl-DL-serine	{'C': ['P']}	1297.56	1297.56	779921	0.0017	0.0017
C5H9NO4	2678.84	C13-label-5	N-Acetyl-DL-serine	S1-00	N-Acetyl-DL-serine	{'C': ['P']}	2663.65	2663.65	779921	0.0034	0.0034
C7H11NO5	109776	PARENT	N-Acetylglutamic acid	S1-00	N-Acetylglutamic acid	{'C': ['P']}	118697	118697	131604	0.9019	0.9019
C7H11NO5	9142.41	C13-label-1	N-Acetylglutamic acid	S1-00	N-Acetylglutamic acid	{'C': ['P']}	552.904	552.904	131604	0.0042	0.0042
C7H11NO5	8754.52	C13-label-2	N-Acetylglutamic acid	S1-00	N-Acetylglutamic acid	{'C': ['P']}	8913.07	8913.07	131604	0.0677	0.0677
C7H11NO5	2510.62	C13-label-3	N-Acetylglutamic acid	S1-00	N-Acetylglutamic acid	{'C': ['P']}	2123.88	2123.88	131604	0.0161	0.0161
C7H11NO5	1375.71	C13-label-4	N-Acetylglutamic acid	S1-00	N-Acetylglutamic acid	{'C': ['P']}	1317.2	1317.2	131604	0.01	0.01
C7H11NO5	0	C13-label-5	N-Acetylglutamic acid	S1-00	N-Acetylglutamic acid	{'C': ['P']}	-45.5552	0	131604	0	0
C4H7NO3	125632	PARENT	N-Acetylglycine	S1-00	N-Acetylglycine	{'C': ['P']}	131368	131368	148248	0.8861	0.8861
C4H7NO3	5113.69	C13-label-1	N-Acetylglycine	S1-00	N-Acetylglycine	{'C': ['P']}	-544.938	0	148248	0	0
C4H7NO3	3418.08	C13-label-2	N-Acetylglycine	S1-00	N-Acetylglycine	{'C': ['P']}	3416.28	3416.28	148248	0.023	0.023
C4H7NO3	13389.1	C13-label-3	N-Acetylglycine	S1-00	N-Acetylglycine	{'C': ['P']}	13463	13463	148248	0.0908	0.0908
C5H9NO3	1.21385e+06	PARENT	N-Acetyl-L-alanine	S1-00	N-Acetyl-L-alanine	{'C': ['P']}	1.28352e+06	1.28352e+06	1.61011e+06	0.7972	0.7972
C5H9NO3	96780.6	C13-label-1	N-Acetyl-L-alanine	S1-00	N-Acetyl-L-alanine	{'C': ['P']}	29964.5	29964.5	1.61011e+06	0.0186	0.0186
C5H9NO3	137457	C13-label-2	N-Acetyl-L-alanine	S1-00	N-Acetyl-L-alanine	{'C': ['P']}	139226	139226	1.61011e+06	0.0865	0.0865
C5H9NO3	124388	C13-label-3	N-Acetyl-L-alanine	S1-00	N-Acetyl-L-alanine	{'C': ['P']}	122521	122521	1.61011e+06	0.0761	0.0761
C5H9NO3	10661.6	C13-label-4	N-Acetyl-L-alanine	S1-00	N-Acetyl-L-alanine	{'C': ['P']}	8009.57	8009.57	1.61011e+06	0.005	0.005
C5H9NO3	26979.1	C13-label-5	N-Acetyl-L-alanine	S1-00	N-Acetyl-L-alanine	{'C': ['P']}	26874.9	26874.9	1.61011e+06	0.0167	0.0167
C7H12N2O4	90497.4	PARENT	N-Acetyl-L-glutamine	S1-00	N-Acetyl-L-glutamine	{'C': ['P']}	97852	97852	113154	0.8648	0.8648
C7H12N2O4	7397.08	C13-label-1	N-Acetyl-L-glutamine	S1-00	N-Acetyl-L-glutamine	{'C': ['P']}	306.345	306.345	113154	0.0027	0.0027
C7H12N2O4	7127.29	C13-label-2	N-Acetyl-L-glutamine	S1-00	N-Acetyl-L-glutamine	{'C': ['P']}	7262.79	7262.79	113154	0.0642	0.0642
C7H12N2O4	2429.98	C13-label-3	N-Acetyl-L-glutamine	S1-00	N-Acetyl-L-glutamine	{'C': ['P']}	2132.6	2132.6	113154	0.0188	0.0188
C7H12N2O4	5515.79	C13-label-4	N-Acetyl-L-glutamine	S1-00	N-Acetyl-L-glutamine	{'C': ['P']}	5599.92	5599.92	113154	0.0495	0.0495
C11H19NO9	318946	PARENT	N-Acetylneuraminic acid	S1-00	N-Acetylneuraminic acid	{'C': ['P']}	360613	360613	394507	0.9141	0.9141
C11H19NO9	34998	C13-label-1	N-Acetylneuraminic acid	S1-00	N-Acetylneuraminic acid	{'C': ['P']}	-4900.01	0	394507	0	0
C11H19NO9	0	C13-label-10	N-Acetylneuraminic acid	S1-00	N-Acetylneuraminic acid	{'C': ['P']}	0.000146945	0.000146945	394507	0	0
C11H19NO9	7327.64	C13-label-2	N-Acetylneuraminic acid	S1-00	N-Acetylneuraminic acid	{'C': ['P']}	6202.2	6202.2	394507	0.0157	0.0157
C11H19NO9	23694.6	C13-label-3	N-Acetylneuraminic acid	S1-00	N-Acetylneuraminic acid	{'C': ['P']}	25233.9	25233.9	394507	0.064	0.064
C11H19NO9	2575.2	C13-label-4	N-Acetylneuraminic acid	S1-00	N-Acetylneuraminic acid	{'C': ['P']}	515.201	515.201	394507	0.0013	0.0013
C11H19NO9	0	C13-label-5	N-Acetylneuraminic acid	S1-00	N-Acetylneuraminic acid	{'C': ['P']}	-127.81	0	394507	0	0
C11H19NO9	1830.46	C13-label-6	N-Acetylneuraminic acid	S1-00	N-Acetylneuraminic acid	{'C': ['P']}	1940.76	1940.76	394507	0.0049	0.0049
C11H19NO9	0	C13-label-7	N-Acetylneuraminic acid	S1-00	N-Acetylneuraminic acid	{'C': ['P']}	-107.527	0	394507	0	0
C11H19NO9	0	C13-label-8	N-Acetylneuraminic acid	S1-00	N-Acetylneuraminic acid	{'C': ['P']}	2.38599	2.38599	394507	0	0
C11H19NO9	0	C13-label-9	N-Acetylneuraminic acid	S1-00	N-Acetylneuraminic acid	{'C': ['P']}	-0.0264793	0	394507	0	0
C7H14N2O3	303181	PARENT	N-Acetylornithine	S1-00	N-Acetylornithine	{'C': ['P']}	327820	327820	329255	0.9956	0.9956
C7H14N2O3	16680.2	C13-label-1	N-Acetylornithine	S1-00	N-Acetylornithine	{'C': ['P']}	-7636.04	0	329255	0	0
C7H14N2O3	1678.28	C13-label-2	N-Acetylornithine	S1-00	N-Acetylornithine	{'C': ['P']}	1434.96	1434.96	329255	0.0044	0.0044
C7H14N2O3	0	C13-label-5	N-Acetylornithine	S1-00	N-Acetylornithine	{'C': ['P']}	-0.0213687	0	329255	0	0
C7H14N2O3	0	C13-label-6	N-Acetylornithine	S1-00	N-Acetylornithine	{'C': ['P']}	0.000120958	0.000120958	329255	0	0
C21H27N7O14P2	2.01842e+06	PARENT	NAD+	S1-00	NAD+	{'C': ['P']}	2.5516e+06	2.5516e+06	2.99025e+06	0.8533	0.8533
C21H27N7O14P2	509872	C13-label-1	NAD+	S1-00	NAD+	{'C': ['P']}	42624.7	42624.7	2.99025e+06	0.0143	0.0143
C21H27N7O14P2	3425.87	C13-label-10	NAD+	S1-00	NAD+	{'C': ['P']}	3438.65	3438.65	2.99025e+06	0.0011	0.0011
C21H27N7O14P2	0	C13-label-11	NAD+	S1-00	NAD+	{'C': ['P']}	-445.889	0	2.99025e+06	0	0
C21H27N7O14P2	0	C13-label-12	NAD+	S1-00	NAD+	{'C': ['P']}	25.2373	25.2373	2.99025e+06	0	0
C21H27N7O14P2	0	C13-label-13	NAD+	S1-00	NAD+	{'C': ['P']}	-0.848663	0	2.99025e+06	0	0
C21H27N7O14P2	0	C13-label-17	NAD+	S1-00	NAD+	{'C': ['P']}	-2.57e-08	0	2.99025e+06	0	0
C21H27N7O14P2	153852	C13-label-2	NAD+	S1-00	NAD+	{'C': ['P']}	114715	114715	2.99025e+06	0.0384	0.0384
C21H27N7O14P2	107742	C13-label-3	NAD+	S1-00	NAD+	{'C': ['P']}	101884	101884	2.99025e+06	0.0341	0.0341
C21H27N7O14P2	52251.6	C13-label-4	NAD+	S1-00	NAD+	{'C': ['P']}	40098.1	40098.1	2.99025e+06	0.0134	0.0134
C21H27N7O14P2	109331	C13-label-5	NAD+	S1-00	NAD+	{'C': ['P']}	121058	121058	2.99025e+06	0.0405	0.0405
C21H27N7O14P2	17608.5	C13-label-6	NAD+	S1-00	NAD+	{'C': ['P']}	-1474.82	0	2.99025e+06	0	0
C21H27N7O14P2	9794.75	C13-label-7	NAD+	S1-00	NAD+	{'C': ['P']}	9864.87	9864.87	2.99025e+06	0.0033	0.0033
C21H27N7O14P2	2988.58	C13-label-8	NAD+	S1-00	NAD+	{'C': ['P']}	1847.05	1847.05	2.99025e+06	0.0006	0.0006
C21H27N7O14P2	3037.7	C13-label-9	NAD+	S1-00	NAD+	{'C': ['P']}	3093.49	3093.49	2.99025e+06	0.001	0.001
C21H29N7O14P2	187667	PARENT	NADH	S1-00	NADH	{'C': ['P']}	237240	237240	281121	0.8439	0.8439
C21H29N7O14P2	43309	C13-label-1	NADH	S1-00	NADH	{'C': ['P']}	-1159.19	0	281121	0	0
C21H29N7O14P2	0	C13-label-10	NADH	S1-00	NADH	{'C': ['P']}	-0.0946184	0	281121	0	0
C21H29N7O14P2	0	C13-label-11	NADH	S1-00	NADH	{'C': ['P']}	0.0029397	0.0029397	281121	0	0
C21H29N7O14P2	0	C13-label-19	NADH	S1-00	NADH	{'C': ['P']}	0	0	281121	0	0
C21H29N7O14P2	16030.9	C13-label-2	NADH	S1-00	NADH	{'C': ['P']}	13937.1	13937.1	281121	0.0496	0.0496
C21H29N7O14P2	14143	C13-label-3	NADH	S1-00	NADH	{'C': ['P']}	13946.5	13946.5	281121	0.0496	0.0496
C21H29N7O14P2	3455.74	C13-label-4	NADH	S1-00	NADH	{'C': ['P']}	1077.94	1077.94	281121	0.0038	0.0038
C21H29N7O14P2	12693.9	C13-label-5	NADH	S1-00	NADH	{'C': ['P']}	14690.5	14690.5	281121	0.0523	0.0523
C21H29N7O14P2	1096.77	C13-label-6	NADH	S1-00	NADH	{'C': ['P']}	-1346.83	0	281121	0	0
C21H29N7O14P2	189.69	C13-label-7	NADH	S1-00	NADH	{'C': ['P']}	227.141	227.141	281121	0.0008	0.0008
C21H29N7O14P2	0	C13-label-8	NADH	S1-00	NADH	{'C': ['P']}	-29.1846	0	281121	0	0
C21H29N7O14P2	0	C13-label-9	NADH	S1-00	NADH	{'C': ['P']}	2.0952	2.0952	281121	0	0
C21H28N7O17P3	297560	PARENT	NADP+	S1-00	NADP+	{'C': ['P']}	376162	376162	444385	0.8465	0.8465
C21H28N7O17P3	70596.3	C13-label-1	NADP+	S1-00	NADP+	{'C': ['P']}	570.645	570.645	444385	0.0013	0.0013
C21H28N7O17P3	0	C13-label-10	NADP+	S1-00	NADP+	{'C': ['P']}	-0.236537	0	444385	0	0
C21H28N7O17P3	0	C13-label-12	NADP+	S1-00	NADP+	{'C': ['P']}	-0.00017199	0	444385	0	0
C21H28N7O17P3	28520	C13-label-2	NADP+	S1-00	NADP+	{'C': ['P']}	25398.2	25398.2	444385	0.0572	0.0572
C21H28N7O17P3	20610.4	C13-label-3	NADP+	S1-00	NADP+	{'C': ['P']}	19142.6	19142.6	444385	0.0431	0.0431
C21H28N7O17P3	7024.03	C13-label-4	NADP+	S1-00	NADP+	{'C': ['P']}	4096.85	4096.85	444385	0.0092	0.0092
C21H28N7O17P3	16473.8	C13-label-5	NADP+	S1-00	NADP+	{'C': ['P']}	18526	18526	444385	0.0417	0.0417
C21H28N7O17P3	3029.99	C13-label-6	NADP+	S1-00	NADP+	{'C': ['P']}	200.477	200.477	444385	0.0005	0.0005
C21H28N7O17P3	509.35	C13-label-7	NADP+	S1-00	NADP+	{'C': ['P']}	283.461	283.461	444385	0.0006	0.0006
C21H28N7O17P3	0	C13-label-8	NADP+	S1-00	NADP+	{'C': ['P']}	-61.009	0	444385	0	0
C21H28N7O17P3	0	C13-label-9	NADP+	S1-00	NADP+	{'C': ['P']}	4.98383	4.98383	444385	0	0
C4H8O2	124308	PARENT	n-Butyric acid	S1-00	n-Butyric acid	{'C': ['P']}	129984	129984	153525	0.8467	0.8467
C4H8O2	5442.93	C13-label-1	n-Butyric acid	S1-00	n-Butyric acid	{'C': ['P']}	-142.989	0	153525	0	0
C4H8O2	20105.6	C13-label-2	n-Butyric acid	S1-00	n-Butyric acid	{'C': ['P']}	20468.1	20468.1	153525	0.1333	0.1333
C4H8O2	1977.19	C13-label-3	n-Butyric acid	S1-00	n-Butyric acid	{'C': ['P']}	1544.33	1544.33	153525	0.0101	0.0101
C4H8O2	1548.66	C13-label-4	n-Butyric acid	S1-00	n-Butyric acid	{'C': ['P']}	1529	1529	153525	0.01	0.01
C11H19NO10	530441	PARENT	N-Glycolylneuraminic acid	S1-00	N-Glycolylneuraminic acid	{'C': ['P']}	599737	599737	628212	0.9547	0.9547
C11H19NO10	62565.2	C13-label-1	N-Glycolylneuraminic acid	S1-00	N-Glycolylneuraminic acid	{'C': ['P']}	-3274.5	0	628212	0	0
C11H19NO10	5063.02	C13-label-2	N-Glycolylneuraminic acid	S1-00	N-Glycolylneuraminic acid	{'C': ['P']}	1897.38	1897.38	628212	0.003	0.003
C11H19NO10	18680.3	C13-label-3	N-Glycolylneuraminic acid	S1-00	N-Glycolylneuraminic acid	{'C': ['P']}	20118.4	20118.4	628212	0.032	0.032
C11H19NO10	1664.5	C13-label-4	N-Glycolylneuraminic acid	S1-00	N-Glycolylneuraminic acid	{'C': ['P']}	2.36635	2.36635	628212	0	0
C11H19NO10	0	C13-label-5	N-Glycolylneuraminic acid	S1-00	N-Glycolylneuraminic acid	{'C': ['P']}	-69.8443	0	628212	0	0
C11H19NO10	1005	C13-label-6	N-Glycolylneuraminic acid	S1-00	N-Glycolylneuraminic acid	{'C': ['P']}	1065.78	1065.78	628212	0.0017	0.0017
C11H19NO10	4502.55	C13-label-7	N-Glycolylneuraminic acid	S1-00	N-Glycolylneuraminic acid	{'C': ['P']}	4649.09	4649.09	628212	0.0074	0.0074
C11H19NO10	917.69	C13-label-8	N-Glycolylneuraminic acid	S1-00	N-Glycolylneuraminic acid	{'C': ['P']}	741.209	741.209	628212	0.0012	0.0012
C11H19NO10	0	C13-label-9	N-Glycolylneuraminic acid	S1-00	N-Glycolylneuraminic acid	{'C': ['P']}	-28.1337	0	628212	0	0
C6H6N2O	149639	PARENT	Nicotinamide	S1-00	Nicotinamide	{'C': ['P']}	160003	160003	160007	1	1
C6H6N2O	5982.13	C13-label-1	Nicotinamide	S1-00	Nicotinamide	{'C': ['P']}	-4330.75	0	160007	0	0
C6H6N2O	0	C13-label-3	Nicotinamide	S1-00	Nicotinamide	{'C': ['P']}	3.41712	3.41712	160007	0	0
C2H8NO4P	1.22174e+07	PARENT	O-Phosphorylethanolamine	S1-00	O-Phosphorylethanolamine	{'C': ['P']}	1.24932e+07	1.24932e+07	1.24932e+07	1	1
C2H8NO4P	273926	C13-label-1	O-Phosphorylethanolamine	S1-00	O-Phosphorylethanolamine	{'C': ['P']}	-348.715	0	1.24932e+07	0	0
C2H8NO4P	0	C13-label-2	O-Phosphorylethanolamine	S1-00	O-Phosphorylethanolamine	{'C': ['P']}	-1535.42	0	1.24932e+07	0	0
C5H12N2O2	222826	PARENT	Ornithine HCl	S1-00	Ornithine HCl	{'C': ['P']}	235616	235616	236306	0.9971	0.9971
C5H12N2O2	8045.83	C13-label-1	Ornithine HCl	S1-00	Ornithine HCl	{'C': ['P']}	-4663.45	0	236306	0	0
C5H12N2O2	748.721	C13-label-2	Ornithine HCl	S1-00	Ornithine HCl	{'C': ['P']}	690.973	690.973	236306	0.0029	0.0029
C5H4N2O4	22901.3	PARENT	orotic acid	S1-00	orotic acid	{'C': ['P']}	24215.8	24215.8	25597.9	0.946	0.946
C5H4N2O4	0	C13-label-1	orotic acid	S1-00	orotic acid	{'C': ['P']}	-1343.98	0	25597.9	0	0
C5H4N2O4	1307.25	C13-label-2	orotic acid	S1-00	orotic acid	{'C': ['P']}	1381.61	1381.61	25597.9	0.054	0.054
C5H4N2O4	0	C13-label-3	orotic acid	S1-00	orotic acid	{'C': ['P']}	-45.3451	0	25597.9	0	0
C5H4N2O4	0	C13-label-4	orotic acid	S1-00	orotic acid	{'C': ['P']}	0.501492	0.501492	25597.9	0	0
C10H12N2O8	1.00928e+06	PARENT	Orotidine	S1-00	Orotidine	{'C': ['P']}	1.12846e+06	1.12846e+06	1.14111e+06	0.9889	0.9889
C10H12N2O8	113818	C13-label-1	Orotidine	S1-00	Orotidine	{'C': ['P']}	587.027	587.027	1.14111e+06	0.0005	0.0005
C10H12N2O8	7008.4	C13-label-2	Orotidine	S1-00	Orotidine	{'C': ['P']}	1347.66	1347.66	1.14111e+06	0.0012	0.0012
C10H12N2O8	4637.88	C13-label-3	Orotidine	S1-00	Orotidine	{'C': ['P']}	4707.32	4707.32	1.14111e+06	0.0041	0.0041
C10H12N2O8	1643.47	C13-label-4	Orotidine	S1-00	Orotidine	{'C': ['P']}	1383.24	1383.24	1.14111e+06	0.0012	0.0012
C10H12N2O8	3997.62	C13-label-5	Orotidine	S1-00	Orotidine	{'C': ['P']}	4122.62	4122.62	1.14111e+06	0.0036	0.0036
C10H12N2O8	699.15	C13-label-6	Orotidine	S1-00	Orotidine	{'C': ['P']}	499.484	499.484	1.14111e+06	0.0004	0.0004
C10H12N2O8	0	C13-label-7	Orotidine	S1-00	Orotidine	{'C': ['P']}	-27.2969	0	1.14111e+06	0	0
C10H12N2O8	0	C13-label-8	Orotidine	S1-00	Orotidine	{'C': ['P']}	0.483025	0.483025	1.14111e+06	0	0
C10H12N2O8	0	C13-label-9	Orotidine	S1-00	Orotidine	{'C': ['P']}	-0.00368022	0	1.14111e+06	0	0
C2H2O4	13231.7	PARENT	Oxalic acid	S1-00	Oxalic acid	{'C': ['P']}	13530.5	13530.5	13782.4	0.9817	0.9817
C2H2O4	546.181	C13-label-1	Oxalic acid	S1-00	Oxalic acid	{'C': ['P']}	251.936	251.936	13782.4	0.0183	0.0183
C23H45NO4	719455	PARENT	Palmitoyl carnitine	S1-00	Palmitoyl carnitine	{'C': ['P']}	930034	930034	950668	0.9783	0.9783
C23H45NO4	148300	C13-label-1	Palmitoyl carnitine	S1-00	Palmitoyl carnitine	{'C': ['P']}	-47858.9	0	950668	0	0
C23H45NO4	0	C13-label-10	Palmitoyl carnitine	S1-00	Palmitoyl carnitine	{'C': ['P']}	48.5193	48.5193	950668	0.0001	0.0001
C23H45NO4	15215.1	C13-label-2	Palmitoyl carnitine	S1-00	Palmitoyl carnitine	{'C': ['P']}	1930.21	1930.21	950668	0.002	0.002
C23H45NO4	5059.62	C13-label-3	Palmitoyl carnitine	S1-00	Palmitoyl carnitine	{'C': ['P']}	4984.73	4984.73	950668	0.0052	0.0052
C23H45NO4	5806	C13-label-4	Palmitoyl carnitine	S1-00	Palmitoyl carnitine	{'C': ['P']}	5996.87	5996.87	950668	0.0063	0.0063
C23H45NO4	2304.86	C13-label-5	Palmitoyl carnitine	S1-00	Palmitoyl carnitine	{'C': ['P']}	1432.85	1432.85	950668	0.0015	0.0015
C23H45NO4	2003.67	C13-label-6	Palmitoyl carnitine	S1-00	Palmitoyl carnitine	{'C': ['P']}	2001.8	2001.8	950668	0.0021	0.0021
C23H45NO4	825.64	C13-label-7	Palmitoyl carnitine	S1-00	Palmitoyl carnitine	{'C': ['P']}	574.011	574.011	950668	0.0006	0.0006
C23H45NO4	3216.18	C13-label-8	Palmitoyl carnitine	S1-00	Palmitoyl carnitine	{'C': ['P']}	3664.92	3664.92	950668	0.0039	0.0039
C23H45NO4	0	C13-label-9	Palmitoyl carnitine	S1-00	Palmitoyl carnitine	{'C': ['P']}	-620.636	0	950668	0	0
C9H17NO5	6.3118e+06	PARENT	Pantothenic acid	S1-00	Pantothenic acid	{'C': ['P']}	6.97882e+06	6.97882e+06	6.97882e+06	1	1
C9H17NO5	607599	C13-label-1	Pantothenic acid	S1-00	Pantothenic acid	{'C': ['P']}	-32832	0	6.97882e+06	0	0
C9H17NO5	19650.6	C13-label-2	Pantothenic acid	S1-00	Pantothenic acid	{'C': ['P']}	-6791.88	0	6.97882e+06	0	0
C9H17NO5	0	C13-label-7	Pantothenic acid	S1-00	Pantothenic acid	{'C': ['P']}	-4.56121e-05	0	6.97882e+06	0	0
C9H17NO5	0	C13-label-8	Pantothenic acid	S1-00	Pantothenic acid	{'C': ['P']}	1.825e-07	1.825e-07	6.97882e+06	0	0
C4H10N3O5P	979448	PARENT	Phosphocreatine	S1-00	Phosphocreatine	{'C': ['P']}	1.02417e+06	1.02417e+06	1.02417e+06	1	1
C4H10N3O5P	25908.1	C13-label-1	Phosphocreatine	S1-00	Phosphocreatine	{'C': ['P']}	-18682.7	0	1.02417e+06	0	0
C4H10N3O5P	0	C13-label-2	Phosphocreatine	S1-00	Phosphocreatine	{'C': ['P']}	-134.992	0	1.02417e+06	0	0
C7H12O4	34420.2	PARENT	Pimelic acid	S1-00	Pimelic acid	{'C': ['P']}	37217.5	37217.5	37217.5	1	1
C7H12O4	0	C13-label-1	Pimelic acid	S1-00	Pimelic acid	{'C': ['P']}	-2891.8	0	37217.5	0	0
C10H19NO4	5.97897e+06	PARENT	Pronanoyl carnitine	S1-00	Pronanoyl carnitine	{'C': ['P']}	6.68502e+06	6.68502e+06	7.78985e+06	0.8582	0.8582
C10H19NO4	1.39352e+06	C13-label-1	Pronanoyl carnitine	S1-00	Pronanoyl carnitine	{'C': ['P']}	798750	798750	7.78985e+06	0.1025	0.1025
C10H19NO4	358743	C13-label-2	Pronanoyl carnitine	S1-00	Pronanoyl carnitine	{'C': ['P']}	275392	275392	7.78985e+06	0.0354	0.0354
C10H19NO4	55283.1	C13-label-3	Pronanoyl carnitine	S1-00	Pronanoyl carnitine	{'C': ['P']}	30681	30681	7.78985e+06	0.0039	0.0039
C10H19NO4	1211.2	C13-label-4	Pronanoyl carnitine	S1-00	Pronanoyl carnitine	{'C': ['P']}	-2151.96	0	7.78985e+06	0	0
C10H19NO4	0	C13-label-8	Pronanoyl carnitine	S1-00	Pronanoyl carnitine	{'C': ['P']}	0.000102844	0.000102844	7.78985e+06	0	0
C8H13N2O5P	36626	PARENT	Pyridoxamine 5-phosphate	S1-00	Pyridoxamine 5-phosphate	{'C': ['P']}	40047	40047	42651.1	0.9389	0.9389
C8H13N2O5P	0	C13-label-1	Pyridoxamine 5-phosphate	S1-00	Pyridoxamine 5-phosphate	{'C': ['P']}	-3556.18	0	42651.1	0	0
C8H13N2O5P	2306.19	C13-label-2	Pyridoxamine 5-phosphate	S1-00	Pyridoxamine 5-phosphate	{'C': ['P']}	2604.09	2604.09	42651.1	0.0611	0.0611
C8H13N2O5P	0	C13-label-3	Pyridoxamine 5-phosphate	S1-00	Pyridoxamine 5-phosphate	{'C': ['P']}	-167.298	0	42651.1	0	0
C5H11O8P	36523.3	PARENT	Ribose 5-P	S1-00	Ribose 5-P	{'C': ['P']}	38619.6	38619.6	40927.8	0.9436	0.9436
C5H11O8P	2203.5	C13-label-1	Ribose 5-P	S1-00	Ribose 5-P	{'C': ['P']}	160.717	160.717	40927.8	0.0039	0.0039
C5H11O8P	699.528	C13-label-2	Ribose 5-P	S1-00	Ribose 5-P	{'C': ['P']}	668.63	668.63	40927.8	0.0163	0.0163
C5H11O8P	717.51	C13-label-3	Ribose 5-P	S1-00	Ribose 5-P	{'C': ['P']}	710.795	710.795	40927.8	0.0174	0.0174
C5H11O8P	0	C13-label-4	Ribose 5-P	S1-00	Ribose 5-P	{'C': ['P']}	-16.0306	0	40927.8	0	0
C5H11O8P	767.94	C13-label-5	Ribose 5-P	S1-00	Ribose 5-P	{'C': ['P']}	768.029	768.029	40927.8	0.0188	0.0188
C14H20N6O5S	91575.2	PARENT	S-adenosylhomocysteine	S1-00	S-adenosylhomocysteine	{'C': ['P']}	107064	107064	121781	0.8792	0.8792
C14H20N6O5S	15994	C13-label-1	S-adenosylhomocysteine	S1-00	S-adenosylhomocysteine	{'C': ['P']}	1853.84	1853.84	121781	0.0152	0.0152
C14H20N6O5S	5613.61	C13-label-2	S-adenosylhomocysteine	S1-00	S-adenosylhomocysteine	{'C': ['P']}	4950.28	4950.28	121781	0.0406	0.0406
C14H20N6O5S	4843.15	C13-label-3	S-adenosylhomocysteine	S1-00	S-adenosylhomocysteine	{'C': ['P']}	4745.36	4745.36	121781	0.039	0.039
C14H20N6O5S	0	C13-label-4	S-adenosylhomocysteine	S1-00	S-adenosylhomocysteine	{'C': ['P']}	-622.016	0	121781	0	0
C14H20N6O5S	2819.86	C13-label-5	S-adenosylhomocysteine	S1-00	S-adenosylhomocysteine	{'C': ['P']}	3153.2	3153.2	121781	0.0259	0.0259
C14H20N6O5S	0	C13-label-6	S-adenosylhomocysteine	S1-00	S-adenosylhomocysteine	{'C': ['P']}	-312.665	0	121781	0	0
C14H20N6O5S	0	C13-label-7	S-adenosylhomocysteine	S1-00	S-adenosylhomocysteine	{'C': ['P']}	13.8561	13.8561	121781	0.0001	0.0001
C14H20N6O5S	0	C13-label-8	S-adenosylhomocysteine	S1-00	S-adenosylhomocysteine	{'C': ['P']}	-0.358599	0	121781	0	0
C6H14O6	1.19923e+06	PARENT	Sorbitol	S1-00	Sorbitol	{'C': ['P']}	1.2823e+06	1.2823e+06	1.33534e+06	0.9603	0.9603
C6H14O6	80049.9	C13-label-1	Sorbitol	S1-00	Sorbitol	{'C': ['P']}	-756.453	0	1.33534e+06	0	0
C6H14O6	7674.99	C13-label-2	Sorbitol	S1-00	Sorbitol	{'C': ['P']}	5697.53	5697.53	1.33534e+06	0.0043	0.0043
C6H14O6	5637.77	C13-label-3	Sorbitol	S1-00	Sorbitol	{'C': ['P']}	5542.64	5542.64	1.33534e+06	0.0042	0.0042
C6H14O6	0	C13-label-4	Sorbitol	S1-00	Sorbitol	{'C': ['P']}	-189.064	0	1.33534e+06	0	0
C6H14O6	4053.09	C13-label-5	Sorbitol	S1-00	Sorbitol	{'C': ['P']}	4100.7	4100.7	1.33534e+06	0.0031	0.0031
C6H14O6	37744.9	C13-label-6	Sorbitol	S1-00	Sorbitol	{'C': ['P']}	37699.4	37699.4	1.33534e+06	0.0282	0.0282
C10H26N4	49357.5	PARENT	Spermine tetrahydrochloride	S1-00	Spermine tetrahydrochloride	{'C': ['P']}	55186.1	55186.1	55186.1	1	1
C10H26N4	3535.38	C13-label-1	Spermine tetrahydrochloride	S1-00	Spermine tetrahydrochloride	{'C': ['P']}	-2216.67	0	55186.1	0	0
C10H26N4	0	C13-label-2	Spermine tetrahydrochloride	S1-00	Spermine tetrahydrochloride	{'C': ['P']}	-84.5311	0	55186.1	0	0
C8H14O4	82962.2	PARENT	Suberic acid	S1-00	Suberic acid	{'C': ['P']}	90711.2	90711.2	90711.2	1	1
C8H14O4	5846.93	C13-label-1	Suberic acid	S1-00	Suberic acid	{'C': ['P']}	-1733.06	0	90711.2	0	0
C8H14O4	0	C13-label-5	Suberic acid	S1-00	Suberic acid	{'C': ['P']}	0.0025031	0.0025031	90711.2	0	0
C4H6O4	2.15775e+06	PARENT	Succinic acid	S1-00	Succinic acid	{'C': ['P']}	2.25627e+06	2.25627e+06	2.90285e+06	0.7773	0.7773
C4H6O4	385898	C13-label-1	Succinic acid	S1-00	Succinic acid	{'C': ['P']}	298861	298861	2.90285e+06	0.103	0.103
C4H6O4	284262	C13-label-2	Succinic acid	S1-00	Succinic acid	{'C': ['P']}	279059	279059	2.90285e+06	0.0961	0.0961
C4H6O4	59036.6	C13-label-3	Succinic acid	S1-00	Succinic acid	{'C': ['P']}	53381.3	53381.3	2.90285e+06	0.0184	0.0184
C4H6O4	15903.4	C13-label-4	Succinic acid	S1-00	Succinic acid	{'C': ['P']}	15276.1	15276.1	2.90285e+06	0.0053	0.0053
C12H22O11	215951	PARENT	Sucrose	S1-00	Sucrose	{'C': ['P']}	246903	246903	248660	0.9929	0.9929
C12H22O11	22620.5	C13-label-1	Sucrose	S1-00	Sucrose	{'C': ['P']}	-7311.86	0	248660	0	0
C12H22O11	662.789	C13-label-10	Sucrose	S1-00	Sucrose	{'C': ['P']}	677.751	677.751	248660	0.0027	0.0027
C12H22O11	1962.58	C13-label-2	Sucrose	S1-00	Sucrose	{'C': ['P']}	1079.33	1079.33	248660	0.0043	0.0043
C2H7NO3S	2.25335e+07	PARENT	Taurine	S1-00	Taurine	{'C': ['P']}	2.30422e+07	2.30422e+07	2.30548e+07	0.9995	0.9995
C2H7NO3S	518238	C13-label-1	Taurine	S1-00	Taurine	{'C': ['P']}	12517.2	12517.2	2.30548e+07	0.0005	0.0005
C2H7NO3S	0	C13-label-2	Taurine	S1-00	Taurine	{'C': ['P']}	-2977.98	0	2.30548e+07	0	0
C9H14N2O12P2	994102	PARENT	UDP	S1-00	UDP	{'C': ['P']}	1.09916e+06	1.09916e+06	1.29155e+06	0.851	0.851
C9H14N2O12P2	146374	C13-label-1	UDP	S1-00	UDP	{'C': ['P']}	50239.8	50239.8	1.29155e+06	0.0389	0.0389
C9H14N2O12P2	45365.3	C13-label-2	UDP	S1-00	UDP	{'C': ['P']}	39715.4	39715.4	1.29155e+06	0.0308	0.0308
C9H14N2O12P2	39477.5	C13-label-3	UDP	S1-00	UDP	{'C': ['P']}	38826.5	38826.5	1.29155e+06	0.0301	0.0301
C9H14N2O12P2	21575.9	C13-label-4	UDP	S1-00	UDP	{'C': ['P']}	20119.8	20119.8	1.29155e+06	0.0156	0.0156
C9H14N2O12P2	31879.9	C13-label-5	UDP	S1-00	UDP	{'C': ['P']}	32145.2	32145.2	1.29155e+06	0.0249	0.0249
C9H14N2O12P2	9177.16	C13-label-6	UDP	S1-00	UDP	{'C': ['P']}	8036.55	8036.55	1.29155e+06	0.0062	0.0062
C9H14N2O12P2	2469.88	C13-label-7	UDP	S1-00	UDP	{'C': ['P']}	2233.97	2233.97	1.29155e+06	0.0017	0.0017
C9H14N2O12P2	1119.66	C13-label-8	UDP	S1-00	UDP	{'C': ['P']}	1079.49	1079.49	1.29155e+06	0.0008	0.0008
C9H14N2O12P2	0	C13-label-9	UDP	S1-00	UDP	{'C': ['P']}	-12.269	0	1.29155e+06	0	0
C15H24N2O17P2	112286	PARENT	UDP-Hexose	S1-00	UDP-Hexose	{'C': ['P']}	132751	132751	227047	0.5847	0.5847
C15H24N2O17P2	29263.3	C13-label-1	UDP-Hexose	S1-00	UDP-Hexose	{'C': ['P']}	12109.8	12109.8	227047	0.0533	0.0533
C15H24N2O17P2	0	C13-label-10	UDP-Hexose	S1-00	UDP-Hexose	{'C': ['P']}	-110.464	0	227047	0	0
C15H24N2O17P2	1329.24	C13-label-11	UDP-Hexose	S1-00	UDP-Hexose	{'C': ['P']}	1393.06	1393.06	227047	0.0061	0.0061
C15H24N2O17P2	536.706	C13-label-12	UDP-Hexose	S1-00	UDP-Hexose	{'C': ['P']}	493.223	493.223	227047	0.0022	0.0022
C15H24N2O17P2	0	C13-label-13	UDP-Hexose	S1-00	UDP-Hexose	{'C': ['P']}	-17.453	0	227047	0	0
C15H24N2O17P2	0	C13-label-14	UDP-Hexose	S1-00	UDP-Hexose	{'C': ['P']}	0.197533	0.197533	227047	0	0
C15H24N2O17P2	0	C13-label-15	UDP-Hexose	S1-00	UDP-Hexose	{'C': ['P']}	-0.000737908	0	227047	0	0
C15H24N2O17P2	13749.9	C13-label-2	UDP-Hexose	S1-00	UDP-Hexose	{'C': ['P']}	12297.9	12297.9	227047	0.0542	0.0542
C15H24N2O17P2	18533.8	C13-label-3	UDP-Hexose	S1-00	UDP-Hexose	{'C': ['P']}	19197.3	19197.3	227047	0.0846	0.0846
C15H24N2O17P2	9590.19	C13-label-4	UDP-Hexose	S1-00	UDP-Hexose	{'C': ['P']}	8158.99	8158.99	227047	0.0359	0.0359
C15H24N2O17P2	11254.8	C13-label-5	UDP-Hexose	S1-00	UDP-Hexose	{'C': ['P']}	11426.5	11426.5	227047	0.0503	0.0503
C15H24N2O17P2	22043.9	C13-label-6	UDP-Hexose	S1-00	UDP-Hexose	{'C': ['P']}	23043.9	23043.9	227047	0.1015	0.1015
C15H24N2O17P2	4437.81	C13-label-7	UDP-Hexose	S1-00	UDP-Hexose	{'C': ['P']}	2484.89	2484.89	227047	0.0109	0.0109
C15H24N2O17P2	2258.24	C13-label-8	UDP-Hexose	S1-00	UDP-Hexose	{'C': ['P']}	2116.97	2116.97	227047	0.0093	0.0093
C15H24N2O17P2	1635.32	C13-label-9	UDP-Hexose	S1-00	UDP-Hexose	{'C': ['P']}	1572.85	1572.85	227047	0.0069	0.0069
C17H27N3O17P2	582274	PARENT	UDP-N-acetylglucosamine	S1-00	UDP-N-acetylglucosamine	{'C': ['P']}	703942	703942	1.13887e+06	0.6181	0.6181
C17H27N3O17P2	166848	C13-label-1	UDP-N-acetylglucosamine	S1-00	UDP-N-acetylglucosamine	{'C': ['P']}	66639.1	66639.1	1.13887e+06	0.0585	0.0585
C17H27N3O17P2	0	C13-label-10	UDP-N-acetylglucosamine	S1-00	UDP-N-acetylglucosamine	{'C': ['P']}	-503.367	0	1.13887e+06	0	0
C17H27N3O17P2	4547.36	C13-label-11	UDP-N-acetylglucosamine	S1-00	UDP-N-acetylglucosamine	{'C': ['P']}	4883.03	4883.03	1.13887e+06	0.0043	0.0043
C17H27N3O17P2	1417.6	C13-label-12	UDP-N-acetylglucosamine	S1-00	UDP-N-acetylglucosamine	{'C': ['P']}	1174.67	1174.67	1.13887e+06	0.001	0.001
C17H27N3O17P2	843.25	C13-label-13	UDP-N-acetylglucosamine	S1-00	UDP-N-acetylglucosamine	{'C': ['P']}	807.553	807.553	1.13887e+06	0.0007	0.0007
C17H27N3O17P2	0	C13-label-14	UDP-N-acetylglucosamine	S1-00	UDP-N-acetylglucosamine	{'C': ['P']}	-37.436	0	1.13887e+06	0	0
C17H27N3O17P2	0	C13-label-15	UDP-N-acetylglucosamine	S1-00	UDP-N-acetylglucosamine	{'C': ['P']}	0.632452	0.632452	1.13887e+06	0	0
C17H27N3O17P2	126586	C13-label-2	UDP-N-acetylglucosamine	S1-00	UDP-N-acetylglucosamine	{'C': ['P']}	126027	126027	1.13887e+06	0.1107	0.1107
C17H27N3O17P2	76843.4	C13-label-3	UDP-N-acetylglucosamine	S1-00	UDP-N-acetylglucosamine	{'C': ['P']}	67217.3	67217.3	1.13887e+06	0.059	0.059
C17H27N3O17P2	42223.6	C13-label-4	UDP-N-acetylglucosamine	S1-00	UDP-N-acetylglucosamine	{'C': ['P']}	36665	36665	1.13887e+06	0.0322	0.0322
C17H27N3O17P2	42624.7	C13-label-5	UDP-N-acetylglucosamine	S1-00	UDP-N-acetylglucosamine	{'C': ['P']}	42608.6	42608.6	1.13887e+06	0.0374	0.0374
C17H27N3O17P2	62159.8	C13-label-6	UDP-N-acetylglucosamine	S1-00	UDP-N-acetylglucosamine	{'C': ['P']}	64216.2	64216.2	1.13887e+06	0.0564	0.0564
C17H27N3O17P2	0	C13-label-7	UDP-N-acetylglucosamine	S1-00	UDP-N-acetylglucosamine	{'C': ['P']}	-8202.72	0	1.13887e+06	0	0
C17H27N3O17P2	17677.9	C13-label-8	UDP-N-acetylglucosamine	S1-00	UDP-N-acetylglucosamine	{'C': ['P']}	20008.1	20008.1	1.13887e+06	0.0176	0.0176
C17H27N3O17P2	6080.79	C13-label-9	UDP-N-acetylglucosamine	S1-00	UDP-N-acetylglucosamine	{'C': ['P']}	4680.61	4680.61	1.13887e+06	0.0041	0.0041
C9H13N2O9P	1.98111e+06	PARENT	UMP	S1-00	UMP	{'C': ['P']}	2.19047e+06	2.19047e+06	2.64561e+06	0.828	0.828
C9H13N2O9P	298800	C13-label-1	UMP	S1-00	UMP	{'C': ['P']}	107881	107881	2.64561e+06	0.0408	0.0408
C9H13N2O9P	109345	C13-label-2	UMP	S1-00	UMP	{'C': ['P']}	98935.9	98935.9	2.64561e+06	0.0374	0.0374
C9H13N2O9P	107993	C13-label-3	UMP	S1-00	UMP	{'C': ['P']}	107162	107162	2.64561e+06	0.0405	0.0405
C9H13N2O9P	49863.4	C13-label-4	UMP	S1-00	UMP	{'C': ['P']}	45320	45320	2.64561e+06	0.0171	0.0171
C9H13N2O9P	71779.1	C13-label-5	UMP	S1-00	UMP	{'C': ['P']}	72338.3	72338.3	2.64561e+06	0.0273	0.0273
C9H13N2O9P	17850.5	C13-label-6	UMP	S1-00	UMP	{'C': ['P']}	15187.7	15187.7	2.64561e+06	0.0057	0.0057
C9H13N2O9P	7419.54	C13-label-7	UMP	S1-00	UMP	{'C': ['P']}	7027.17	7027.17	2.64561e+06	0.0027	0.0027
C9H13N2O9P	1436.5	C13-label-8	UMP	S1-00	UMP	{'C': ['P']}	1290.61	1290.61	2.64561e+06	0.0005	0.0005
C9H13N2O9P	0	C13-label-9	UMP	S1-00	UMP	{'C': ['P']}	-15.2134	0	2.64561e+06	0	0
C4H4N2O2	158618	PARENT	Uracil	S1-00	Uracil	{'C': ['P']}	165861	165861	165861	1	1
C4H4N2O2	5656.14	C13-label-1	Uracil	S1-00	Uracil	{'C': ['P']}	-1515.47	0	165861	0	0
C4H4N2O2	0	C13-label-2	Uracil	S1-00	Uracil	{'C': ['P']}	-72.1491	0	165861	0	0
C5H8N2O5	74319	PARENT	Ureidosuccinic acid	S1-00	Ureidosuccinic acid	{'C': ['P']}	78584.7	78584.7	91060.7	0.863	0.863
C5H8N2O5	9735.4	C13-label-1	Ureidosuccinic acid	S1-00	Ureidosuccinic acid	{'C': ['P']}	5818.47	5818.47	91060.7	0.0639	0.0639
C5H8N2O5	6779.22	C13-label-2	Ureidosuccinic acid	S1-00	Ureidosuccinic acid	{'C': ['P']}	6654.91	6654.91	91060.7	0.0731	0.0731
C5H8N2O5	0	C13-label-3	Ureidosuccinic acid	S1-00	Ureidosuccinic acid	{'C': ['P']}	-226.985	0	91060.7	0	0
C5H8N2O5	0	C13-label-4	Ureidosuccinic acid	S1-00	Ureidosuccinic acid	{'C': ['P']}	2.54141	2.54141	91060.7	0	0
C5H4N4O3	976948	PARENT	Uric acid	S1-00	Uric acid	{'C': ['P']}	1.03302e+06	1.03302e+06	1.03304e+06	1	1
C5H4N4O3	47160.8	C13-label-1	Uric acid	S1-00	Uric acid	{'C': ['P']}	-8018.53	0	1.03304e+06	0	0
C5H4N4O3	0	C13-label-2	Uric acid	S1-00	Uric acid	{'C': ['P']}	-916.763	0	1.03304e+06	0	0
C5H4N4O3	0	C13-label-3	Uric acid	S1-00	Uric acid	{'C': ['P']}	22.3281	22.3281	1.03304e+06	0	0
C9H12N2O6	53909	PARENT	Uridine	S1-00	Uridine	{'C': ['P']}	59606	59606	62436.9	0.9547	0.9547
C9H12N2O6	4784.97	C13-label-1	Uridine	S1-00	Uridine	{'C': ['P']}	-722.727	0	62436.9	0	0
C9H12N2O6	2261.63	C13-label-2	Uridine	S1-00	Uridine	{'C': ['P']}	2245.22	2245.22	62436.9	0.036	0.036
C9H12N2O6	713.77	C13-label-3	Uridine	S1-00	Uridine	{'C': ['P']}	584.403	584.403	62436.9	0.0094	0.0094
C9H12N2O6	0	C13-label-4	Uridine	S1-00	Uridine	{'C': ['P']}	-44.7892	0	62436.9	0	0
C9H12N2O6	0	C13-label-5	Uridine	S1-00	Uridine	{'C': ['P']}	1.29777	1.29777	62436.9	0	0
C9H12N2O6	0	C13-label-6	Uridine	S1-00	Uridine	{'C': ['P']}	-0.0196165	0	62436.9	0	0
C9H12N2O6	0	C13-label-7	Uridine	S1-00	Uridine	{'C': ['P']}	0.000165367	0.000165367	62436.9	0	0
C9H12N2O6	0	C13-label-8	Uridine	S1-00	Uridine	{'C': ['P']}	-7.404e-07	0	62436.9	0	0
C9H15N2O15P3	113925	PARENT	UTP	S1-00	UTP	{'C': ['P']}	125965	125965	140532	0.8963	0.8963
C9H15N2O15P3	13878.4	C13-label-1	UTP	S1-00	UTP	{'C': ['P']}	2590.8	2590.8	140532	0.0184	0.0184
C9H15N2O15P3	5108.11	C13-label-2	UTP	S1-00	UTP	{'C': ['P']}	4734.45	4734.45	140532	0.0337	0.0337
C9H15N2O15P3	4546.01	C13-label-3	UTP	S1-00	UTP	{'C': ['P']}	4469.61	4469.61	140532	0.0318	0.0318
C9H15N2O15P3	1125.02	C13-label-4	UTP	S1-00	UTP	{'C': ['P']}	879.226	879.226	140532	0.0063	0.0063
C9H15N2O15P3	1863.97	C13-label-5	UTP	S1-00	UTP	{'C': ['P']}	1891.79	1891.79	140532	0.0135	0.0135
C9H15N2O15P3	0	C13-label-6	UTP	S1-00	UTP	{'C': ['P']}	-85.2034	0	140532	0	0
C9H15N2O15P3	0	C13-label-7	UTP	S1-00	UTP	{'C': ['P']}	1.42569	1.42569	140532	0	0
C9H15N2O15P3	0	C13-label-8	UTP	S1-00	UTP	{'C': ['P']}	-0.010577	0	140532	0	0
C5H4N4O2	114968	PARENT	Xanthine	S1-00	Xanthine	{'C': ['P']}	121567	121567	121567	1	1
C5H4N4O2	4571.75	C13-label-1	Xanthine	S1-00	Xanthine	{'C': ['P']}	-1966.46	0	121567	0	0
C5H4N4O2	0	C13-label-2	Xanthine	S1-00	Xanthine	{'C': ['P']}	-62.4717	0	121567	0	0
C10H12N4O6	26934.7	PARENT	Xanthosine	S1-00	Xanthosine	{'C': ['P']}	30115.4	30115.4	31651.3	0.9515	0.9515
C10H12N4O6	3920.73	C13-label-1	Xanthosine	S1-00	Xanthosine	{'C': ['P']}	992.259	992.259	31651.3	0.0313	0.0313
C10H12N4O6	738.397	C13-label-2	Xanthosine	S1-00	Xanthosine	{'C': ['P']}	541.267	541.267	31651.3	0.0171	0.0171
C10H12N4O6	0	C13-label-3	Xanthosine	S1-00	Xanthosine	{'C': ['P']}	-57.4081	0	31651.3	0	0
C10H12N4O6	0	C13-label-4	Xanthosine	S1-00	Xanthosine	{'C': ['P']}	2.38331	2.38331	31651.3	0.0001	0.0001
C10H12N4O6	0	C13-label-5	Xanthosine	S1-00	Xanthosine	{'C': ['P']}	-0.0548209	0	31651.3	0	0
C10H12N4O6	0	C13-label-7	Xanthosine	S1-00	Xanthosine	{'C': ['P']}	-7.0125e-06	0	31651.3	0	0
C11H15N2O8P	6875.61	PARENT	?-Nicotinamide mononucleotide	S1-01	?-Nicotinamide mononucleotide	{'C': ['P']}	7773.83	7773.83	7773.83	1	1
C11H15N2O8P	0	C13-label-3	?-Nicotinamide mononucleotide	S1-01	?-Nicotinamide mononucleotide	{'C': ['P']}	-1.75424	0	7773.83	0	0
C7H11N3O2	31169.6	PARENT	1-methylhistidine	S1-01	1-methylhistidine	{'C': ['P']}	33702.7	33702.7	34355.2	0.981	0.981
C7H11N3O2	3059.33	C13-label-1	1-methylhistidine	S1-01	1-methylhistidine	{'C': ['P']}	652.536	652.536	34355.2	0.019	0.019
C6H11NO4	36593.5	PARENT	2-Aminoadipic acid	S1-01	2-Aminoadipic acid	{'C': ['P']}	39128.2	39128.2	39128.2	1	1
C6H11NO4	1527.28	C13-label-1	2-Aminoadipic acid	S1-01	2-Aminoadipic acid	{'C': ['P']}	-990.995	0	39128.2	0	0
C9H13N3O4	15960.3	PARENT	2'-Deoxycytidine	S1-01	2'-Deoxycytidine	{'C': ['P']}	17646.9	17646.9	18171.1	0.9712	0.9712
C9H13N3O4	2091.71	C13-label-1	2'-Deoxycytidine	S1-01	2'-Deoxycytidine	{'C': ['P']}	524.159	524.159	18171.1	0.0288	0.0288
C9H13N3O4	0	C13-label-5	2'-Deoxycytidine	S1-01	2'-Deoxycytidine	{'C': ['P']}	0.0020557	0.0020557	18171.1	0	0
C4H8O3	197355	PARENT	2-Hydroxybutyric acid	S1-01	2-Hydroxybutyric acid	{'C': ['P']}	206366	206366	251254	0.8213	0.8213
C4H8O3	17560.9	C13-label-1	2-Hydroxybutyric acid	S1-01	2-Hydroxybutyric acid	{'C': ['P']}	8996.21	8996.21	251254	0.0358	0.0358
C4H8O3	28235.9	C13-label-2	2-Hydroxybutyric acid	S1-01	2-Hydroxybutyric acid	{'C': ['P']}	28421.2	28421.2	251254	0.1131	0.1131
C4H8O3	1326.74	C13-label-3	2-Hydroxybutyric acid	S1-01	2-Hydroxybutyric acid	{'C': ['P']}	706.229	706.229	251254	0.0028	0.0028
C4H8O3	6775.2	C13-label-4	2-Hydroxybutyric acid	S1-01	2-Hydroxybutyric acid	{'C': ['P']}	6763.85	6763.85	251254	0.0269	0.0269
C6H10O4	47217.4	PARENT	2-Methylglutaric acid	S1-01	2-Methylglutaric acid	{'C': ['P']}	50488	50488	52430.7	0.9629	0.9629
C6H10O4	546.711	C13-label-1	2-Methylglutaric acid	S1-01	2-Methylglutaric acid	{'C': ['P']}	-2784.41	0	52430.7	0	0
C6H10O4	408.711	C13-label-2	2-Methylglutaric acid	S1-01	2-Methylglutaric acid	{'C': ['P']}	488.598	488.598	52430.7	0.0093	0.0093
C6H10O4	1438.04	C13-label-5	2-Methylglutaric acid	S1-01	2-Methylglutaric acid	{'C': ['P']}	1454.18	1454.18	52430.7	0.0277	0.0277
C5H6O5	111559	PARENT	2-oxoglutarate	S1-01	2-oxoglutarate	{'C': ['P']}	117962	117962	181293	0.6507	0.6507
C5H6O5	27147.9	C13-label-1	2-oxoglutarate	S1-01	2-oxoglutarate	{'C': ['P']}	21840.5	21840.5	181293	0.1205	0.1205
C5H6O5	26742	C13-label-2	2-oxoglutarate	S1-01	2-oxoglutarate	{'C': ['P']}	26537.6	26537.6	181293	0.1464	0.1464
C5H6O5	9749.47	C13-label-3	2-oxoglutarate	S1-01	2-oxoglutarate	{'C': ['P']}	9068.11	9068.11	181293	0.05	0.05
C5H6O5	3945.94	C13-label-4	2-oxoglutarate	S1-01	2-oxoglutarate	{'C': ['P']}	3778.98	3778.98	181293	0.0208	0.0208
C5H6O5	2148.33	C13-label-5	2-oxoglutarate	S1-01	2-oxoglutarate	{'C': ['P']}	2105.23	2105.23	181293	0.0116	0.0116
C6H10O5	244945	PARENT	3-Hydroxy-3-methylglutaric acid	S1-01	3-Hydroxy-3-methylglutaric acid	{'C': ['P']}	261911	261911	325489	0.8047	0.8047
C6H10O5	22156.4	C13-label-1	3-Hydroxy-3-methylglutaric acid	S1-01	3-Hydroxy-3-methylglutaric acid	{'C': ['P']}	5984.81	5984.81	325489	0.0184	0.0184
C6H10O5	39581.2	C13-label-2	3-Hydroxy-3-methylglutaric acid	S1-01	3-Hydroxy-3-methylglutaric acid	{'C': ['P']}	40572.3	40572.3	325489	0.1247	0.1247
C6H10O5	5224.12	C13-label-3	3-Hydroxy-3-methylglutaric acid	S1-01	3-Hydroxy-3-methylglutaric acid	{'C': ['P']}	3586.07	3586.07	325489	0.011	0.011
C6H10O5	11817.3	C13-label-4	3-Hydroxy-3-methylglutaric acid	S1-01	3-Hydroxy-3-methylglutaric acid	{'C': ['P']}	11934.5	11934.5	325489	0.0367	0.0367
C6H10O5	562.678	C13-label-5	3-Hydroxy-3-methylglutaric acid	S1-01	3-Hydroxy-3-methylglutaric acid	{'C': ['P']}	302.5	302.5	325489	0.0009	0.0009
C6H10O5	1202.11	C13-label-6	3-Hydroxy-3-methylglutaric acid	S1-01	3-Hydroxy-3-methylglutaric acid	{'C': ['P']}	1197.28	1197.28	325489	0.0037	0.0037
C4H8O3	670345	PARENT	3-Hydroxybutyric acid	S1-01	3-Hydroxybutyric acid	{'C': ['P']}	700953	700953	700953	1	1
C4H8O3	24889.7	C13-label-1	3-Hydroxybutyric acid	S1-01	3-Hydroxybutyric acid	{'C': ['P']}	-5385.03	0	700953	0	0
C4H8O3	0	C13-label-2	3-Hydroxybutyric acid	S1-01	3-Hydroxybutyric acid	{'C': ['P']}	-338.865	0	700953	0	0
C7H11N3O2	344750	PARENT	3-Methyl-L-histidine	S1-01	3-Methyl-L-histidine	{'C': ['P']}	372767	372767	372767	1	1
C7H11N3O2	15166.6	C13-label-1	3-Methyl-L-histidine	S1-01	3-Methyl-L-histidine	{'C': ['P']}	-12746.8	0	372767	0	0
C7H11N3O2	0	C13-label-2	3-Methyl-L-histidine	S1-01	3-Methyl-L-histidine	{'C': ['P']}	-115.564	0	372767	0	0
C3H7O7P	163662	PARENT	3-Phosphoglyceric acid	S1-01	3-Phosphoglyceric acid	{'C': ['P']}	169235	169235	181207	0.9339	0.9339
C3H7O7P	7029.05	C13-label-1	3-Phosphoglyceric acid	S1-01	3-Phosphoglyceric acid	{'C': ['P']}	1552.2	1552.2	181207	0.0086	0.0086
C3H7O7P	2225.02	C13-label-2	3-Phosphoglyceric acid	S1-01	3-Phosphoglyceric acid	{'C': ['P']}	2152.99	2152.99	181207	0.0119	0.0119
C3H7O7P	8290.97	C13-label-3	3-Phosphoglyceric acid	S1-01	3-Phosphoglyceric acid	{'C': ['P']}	8266.65	8266.65	181207	0.0456	0.0456
C4H8N2O3	38703.3	PARENT	3-Ureidopropionic acid	S1-01	3-Ureidopropionic acid	{'C': ['P']}	40470.5	40470.5	40470.5	1	1
C4H8N2O3	1372.92	C13-label-1	3-Ureidopropionic acid	S1-01	3-Ureidopropionic acid	{'C': ['P']}	-377.215	0	40470.5	0	0
C4H8O3	23645.2	PARENT	4-Hydroxybutyric acid (GHB)	S1-01	4-Hydroxybutyric acid (GHB)	{'C': ['P']}	24724.8	24724.8	27363.7	0.9036	0.9036
C4H8O3	1041.34	C13-label-1	4-Hydroxybutyric acid (GHB)	S1-01	4-Hydroxybutyric acid (GHB)	{'C': ['P']}	-20.9834	0	27363.7	0	0
C4H8O3	2597.81	C13-label-2	4-Hydroxybutyric acid (GHB)	S1-01	4-Hydroxybutyric acid (GHB)	{'C': ['P']}	2638.88	2638.88	27363.7	0.0964	0.0964
C5H9NO3	408704	PARENT	4-hydroxy-proline	S1-01	4-hydroxy-proline	{'C': ['P']}	432163	432163	432163	1	1
C5H9NO3	11536.4	C13-label-1	4-hydroxy-proline	S1-01	4-hydroxy-proline	{'C': ['P']}	-11921.8	0	432163	0	0
C5H9NO3	0	C13-label-2	4-hydroxy-proline	S1-01	4-hydroxy-proline	{'C': ['P']}	-3.13823	0	432163	0	0
C5H13O14P3	14599.7	PARENT	5-phosphoribosyl-1-pyrophosphate	S1-01	5-phosphoribosyl-1-pyrophosphate	{'C': ['P']}	15437.6	15437.6	17680.4	0.8731	0.8731
C5H13O14P3	1009.48	C13-label-1	5-phosphoribosyl-1-pyrophosphate	S1-01	5-phosphoribosyl-1-pyrophosphate	{'C': ['P']}	198.779	198.779	17680.4	0.0112	0.0112
C5H13O14P3	1137.83	C13-label-2	5-phosphoribosyl-1-pyrophosphate	S1-01	5-phosphoribosyl-1-pyrophosphate	{'C': ['P']}	1148.73	1148.73	17680.4	0.065	0.065
C5H13O14P3	543.891	C13-label-3	5-phosphoribosyl-1-pyrophosphate	S1-01	5-phosphoribosyl-1-pyrophosphate	{'C': ['P']}	517.559	517.559	17680.4	0.0293	0.0293
C5H13O14P3	0	C13-label-4	5-phosphoribosyl-1-pyrophosphate	S1-01	5-phosphoribosyl-1-pyrophosphate	{'C': ['P']}	-11.9167	0	17680.4	0	0
C5H13O14P3	377.659	C13-label-5	5-phosphoribosyl-1-pyrophosphate	S1-01	5-phosphoribosyl-1-pyrophosphate	{'C': ['P']}	377.726	377.726	17680.4	0.0214	0.0214
C11H15N5O3S	24472	PARENT	5'-S-Methyl-5'-thioadenosine	S1-01	5'-S-Methyl-5'-thioadenosine	{'C': ['P']}	27669	27669	32678.2	0.8467	0.8467
C11H15N5O3S	5636.4	C13-label-1	5'-S-Methyl-5'-thioadenosine	S1-01	5'-S-Methyl-5'-thioadenosine	{'C': ['P']}	2923.61	2923.61	32678.2	0.0895	0.0895
C11H15N5O3S	0	C13-label-2	5'-S-Methyl-5'-thioadenosine	S1-01	5'-S-Methyl-5'-thioadenosine	{'C': ['P']}	-512.021	0	32678.2	0	0
C11H15N5O3S	0	C13-label-3	5'-S-Methyl-5'-thioadenosine	S1-01	5'-S-Methyl-5'-thioadenosine	{'C': ['P']}	28.6973	28.6973	32678.2	0.0009	0.0009
C11H15N5O3S	0	C13-label-4	5'-S-Methyl-5'-thioadenosine	S1-01	5'-S-Methyl-5'-thioadenosine	{'C': ['P']}	-0.895645	0	32678.2	0	0
C11H15N5O3S	1920.01	C13-label-5	5'-S-Methyl-5'-thioadenosine	S1-01	5'-S-Methyl-5'-thioadenosine	{'C': ['P']}	2053.02	2053.02	32678.2	0.0628	0.0628
C11H15N5O3S	0	C13-label-6	5'-S-Methyl-5'-thioadenosine	S1-01	5'-S-Methyl-5'-thioadenosine	{'C': ['P']}	-136.73	0	32678.2	0	0
C11H15N5O3S	0	C13-label-7	5'-S-Methyl-5'-thioadenosine	S1-01	5'-S-Methyl-5'-thioadenosine	{'C': ['P']}	3.79426	3.79426	32678.2	0.0001	0.0001
C7H15NO2	5.29024e+06	PARENT	Acetylcholine	S1-01	Acetylcholine	{'C': ['P']}	5.72017e+06	5.72017e+06	5.72017e+06	1	1
C7H15NO2	378532	C13-label-1	Acetylcholine	S1-01	Acetylcholine	{'C': ['P']}	-39705.2	0	5.72017e+06	0	0
C7H15NO2	9016.54	C13-label-2	Acetylcholine	S1-01	Acetylcholine	{'C': ['P']}	-2621.99	0	5.72017e+06	0	0
C23H38N7O17P3S	48290.4	PARENT	acetyl-CoA	S1-01	acetyl-CoA	{'C': ['P']}	62424.7	62424.7	76882.5	0.8119	0.8119
C23H38N7O17P3S	13844.6	C13-label-1	acetyl-CoA	S1-01	acetyl-CoA	{'C': ['P']}	1761.16	1761.16	76882.5	0.0229	0.0229
C23H38N7O17P3S	10650.4	C13-label-2	acetyl-CoA	S1-01	acetyl-CoA	{'C': ['P']}	11087.7	11087.7	76882.5	0.1442	0.1442
C23H38N7O17P3S	614.702	C13-label-22	acetyl-CoA	S1-01	acetyl-CoA	{'C': ['P']}	621.601	621.601	76882.5	0.0081	0.0081
C23H38N7O17P3S	1856.73	C13-label-3	acetyl-CoA	S1-01	acetyl-CoA	{'C': ['P']}	-464.737	0	76882.5	0	0
C23H38N7O17P3S	0	C13-label-4	acetyl-CoA	S1-01	acetyl-CoA	{'C': ['P']}	-195.814	0	76882.5	0	0
C23H38N7O17P3S	767.285	C13-label-5	acetyl-CoA	S1-01	acetyl-CoA	{'C': ['P']}	969.483	969.483	76882.5	0.0126	0.0126
C23H38N7O17P3S	0	C13-label-6	acetyl-CoA	S1-01	acetyl-CoA	{'C': ['P']}	-189.88	0	76882.5	0	0
C23H38N7O17P3S	0	C13-label-7	acetyl-CoA	S1-01	acetyl-CoA	{'C': ['P']}	17.8095	17.8095	76882.5	0.0002	0.0002
C23H38N7O17P3S	0	C13-label-8	acetyl-CoA	S1-01	acetyl-CoA	{'C': ['P']}	-1.05158	0	76882.5	0	0
C9H17NO4	1.44529e+08	PARENT	Acetyl-L-carnitine	S1-01	Acetyl-L-carnitine	{'C': ['P']}	1.59803e+08	1.59803e+08	2.04302e+08	0.7822	0.7822
C9H17NO4	2.25475e+07	C13-label-1	Acetyl-L-carnitine	S1-01	Acetyl-L-carnitine	{'C': ['P']}	8.68927e+06	8.68927e+06	2.04302e+08	0.0425	0.0425
C9H17NO4	3.44855e+07	C13-label-2	Acetyl-L-carnitine	S1-01	Acetyl-L-carnitine	{'C': ['P']}	3.58077e+07	3.58077e+07	2.04302e+08	0.1753	0.1753
C9H17NO4	2.41621e+06	C13-label-3	Acetyl-L-carnitine	S1-01	Acetyl-L-carnitine	{'C': ['P']}	-247026	0	2.04302e+08	0	0
C9H17NO4	75633.9	C13-label-4	Acetyl-L-carnitine	S1-01	Acetyl-L-carnitine	{'C': ['P']}	2806.6	2806.6	2.04302e+08	0	0
C5H5N5	474719	PARENT	Adenine	S1-01	Adenine	{'C': ['P']}	501966	501966	544656	0.9216	0.9216
C5H5N5	55299	C13-label-1	Adenine	S1-01	Adenine	{'C': ['P']}	29964.8	29964.8	544656	0.055	0.055
C5H5N5	11343.9	C13-label-2	Adenine	S1-01	Adenine	{'C': ['P']}	9781.32	9781.32	544656	0.018	0.018
C5H5N5	2886.68	C13-label-3	Adenine	S1-01	Adenine	{'C': ['P']}	2597.12	2597.12	544656	0.0048	0.0048
C5H5N5	403.245	C13-label-4	Adenine	S1-01	Adenine	{'C': ['P']}	346.298	346.298	544656	0.0006	0.0006
C5H5N5	0	C13-label-5	Adenine	S1-01	Adenine	{'C': ['P']}	-4.17781	0	544656	0	0
C15H23N5O14P2	197197	PARENT	Adenosine diphosphate ribose	S1-01	Adenosine diphosphate ribose	{'C': ['P']}	233138	233138	276642	0.8427	0.8427
C15H23N5O14P2	32875.1	C13-label-1	Adenosine diphosphate ribose	S1-01	Adenosine diphosphate ribose	{'C': ['P']}	-381.915	0	276642	0	0
C15H23N5O14P2	0	C13-label-10	Adenosine diphosphate ribose	S1-01	Adenosine diphosphate ribose	{'C': ['P']}	2.2287	2.2287	276642	0	0
C15H23N5O14P2	0	C13-label-11	Adenosine diphosphate ribose	S1-01	Adenosine diphosphate ribose	{'C': ['P']}	-0.041186	0	276642	0	0
C15H23N5O14P2	0	C13-label-12	Adenosine diphosphate ribose	S1-01	Adenosine diphosphate ribose	{'C': ['P']}	0.000456909	0.000456909	276642	0	0
C15H23N5O14P2	10805.5	C13-label-2	Adenosine diphosphate ribose	S1-01	Adenosine diphosphate ribose	{'C': ['P']}	9536.13	9536.13	276642	0.0345	0.0345
C15H23N5O14P2	10333.2	C13-label-3	Adenosine diphosphate ribose	S1-01	Adenosine diphosphate ribose	{'C': ['P']}	10297.4	10297.4	276642	0.0372	0.0372
C15H23N5O14P2	4296.4	C13-label-4	Adenosine diphosphate ribose	S1-01	Adenosine diphosphate ribose	{'C': ['P']}	3389.78	3389.78	276642	0.0123	0.0123
C15H23N5O14P2	16291.5	C13-label-5	Adenosine diphosphate ribose	S1-01	Adenosine diphosphate ribose	{'C': ['P']}	17713.8	17713.8	276642	0.064	0.064
C15H23N5O14P2	3332.72	C13-label-6	Adenosine diphosphate ribose	S1-01	Adenosine diphosphate ribose	{'C': ['P']}	1692.51	1692.51	276642	0.0061	0.0061
C15H23N5O14P2	0	C13-label-7	Adenosine diphosphate ribose	S1-01	Adenosine diphosphate ribose	{'C': ['P']}	-268.139	0	276642	0	0
C15H23N5O14P2	794.38	C13-label-8	Adenosine diphosphate ribose	S1-01	Adenosine diphosphate ribose	{'C': ['P']}	872.316	872.316	276642	0.0032	0.0032
C15H23N5O14P2	0	C13-label-9	Adenosine diphosphate ribose	S1-01	Adenosine diphosphate ribose	{'C': ['P']}	-67.1051	0	276642	0	0
C6H10O4	47217.4	PARENT	Adipic acid	S1-01	Adipic acid	{'C': ['P']}	50488	50488	52430.7	0.9629	0.9629
C6H10O4	546.711	C13-label-1	Adipic acid	S1-01	Adipic acid	{'C': ['P']}	-2784.41	0	52430.7	0	0
C6H10O4	408.711	C13-label-2	Adipic acid	S1-01	Adipic acid	{'C': ['P']}	488.598	488.598	52430.7	0.0093	0.0093
C6H10O4	1438.04	C13-label-5	Adipic acid	S1-01	Adipic acid	{'C': ['P']}	1454.18	1454.18	52430.7	0.0277	0.0277
C10H15N5O10P2	9.46232e+06	PARENT	ADP	S1-01	ADP	{'C': ['P']}	1.05797e+07	1.05797e+07	1.35179e+07	0.7826	0.7826
C10H15N5O10P2	1.35961e+06	C13-label-1	ADP	S1-01	ADP	{'C': ['P']}	328946	328946	1.35179e+07	0.0243	0.0243
C10H15N5O10P2	0	C13-label-10	ADP	S1-01	ADP	{'C': ['P']}	-74.3982	0	1.35179e+07	0	0
C10H15N5O10P2	641035	C13-label-2	ADP	S1-01	ADP	{'C': ['P']}	609390	609390	1.35179e+07	0.0451	0.0451
C10H15N5O10P2	545989	C13-label-3	ADP	S1-01	ADP	{'C': ['P']}	533051	533051	1.35179e+07	0.0394	0.0394
C10H15N5O10P2	387676	C13-label-4	ADP	S1-01	ADP	{'C': ['P']}	370937	370937	1.35179e+07	0.0274	0.0274
C10H15N5O10P2	684889	C13-label-5	ADP	S1-01	ADP	{'C': ['P']}	698068	698068	1.35179e+07	0.0516	0.0516
C10H15N5O10P2	291820	C13-label-6	ADP	S1-01	ADP	{'C': ['P']}	265690	265690	1.35179e+07	0.0197	0.0197
C10H15N5O10P2	105524	C13-label-7	ADP	S1-01	ADP	{'C': ['P']}	96450.4	96450.4	1.35179e+07	0.0071	0.0071
C10H15N5O10P2	32033	C13-label-8	ADP	S1-01	ADP	{'C': ['P']}	29338.3	29338.3	1.35179e+07	0.0022	0.0022
C10H15N5O10P2	6974.81	C13-label-9	ADP	S1-01	ADP	{'C': ['P']}	6364.63	6364.63	1.35179e+07	0.0005	0.0005
C16H25N5O15P2	37541.9	PARENT	ADP-D-glucose	S1-01	ADP-D-glucose	{'C': ['P']}	44882.6	44882.6	74496.4	0.6025	0.6025
C16H25N5O15P2	8084.71	C13-label-1	ADP-D-glucose	S1-01	ADP-D-glucose	{'C': ['P']}	1587.1	1587.1	74496.4	0.0213	0.0213
C16H25N5O15P2	803.054	C13-label-10	ADP-D-glucose	S1-01	ADP-D-glucose	{'C': ['P']}	863.114	863.114	74496.4	0.0116	0.0116
C16H25N5O15P2	0	C13-label-11	ADP-D-glucose	S1-01	ADP-D-glucose	{'C': ['P']}	-57.2869	0	74496.4	0	0
C16H25N5O15P2	0	C13-label-12	ADP-D-glucose	S1-01	ADP-D-glucose	{'C': ['P']}	1.58834	1.58834	74496.4	0	0
C16H25N5O15P2	0	C13-label-13	ADP-D-glucose	S1-01	ADP-D-glucose	{'C': ['P']}	-0.0234993	0	74496.4	0	0
C16H25N5O15P2	5753.39	C13-label-2	ADP-D-glucose	S1-01	ADP-D-glucose	{'C': ['P']}	5798.67	5798.67	74496.4	0.0778	0.0778
C16H25N5O15P2	6046.04	C13-label-3	ADP-D-glucose	S1-01	ADP-D-glucose	{'C': ['P']}	6034.18	6034.18	74496.4	0.081	0.081
C16H25N5O15P2	2367.61	C13-label-4	ADP-D-glucose	S1-01	ADP-D-glucose	{'C': ['P']}	1768.98	1768.98	74496.4	0.0237	0.0237
C16H25N5O15P2	4176.58	C13-label-5	ADP-D-glucose	S1-01	ADP-D-glucose	{'C': ['P']}	4425.63	4425.63	74496.4	0.0594	0.0594
C16H25N5O15P2	7420.29	C13-label-6	ADP-D-glucose	S1-01	ADP-D-glucose	{'C': ['P']}	7739.34	7739.34	74496.4	0.1039	0.1039
C16H25N5O15P2	931.87	C13-label-7	ADP-D-glucose	S1-01	ADP-D-glucose	{'C': ['P']}	140.691	140.691	74496.4	0.0019	0.0019
C16H25N5O15P2	1200.37	C13-label-8	ADP-D-glucose	S1-01	ADP-D-glucose	{'C': ['P']}	1254.51	1254.51	74496.4	0.0168	0.0168
C16H25N5O15P2	0	C13-label-9	ADP-D-glucose	S1-01	ADP-D-glucose	{'C': ['P']}	-113.317	0	74496.4	0	0
C9H15N4O8P	12565.5	PARENT	AICA ribonucleotide	S1-01	AICA ribonucleotide	{'C': ['P']}	13893.4	13893.4	71806	0.1935	0.1935
C9H15N4O8P	10313.1	C13-label-1	AICA ribonucleotide	S1-01	AICA ribonucleotide	{'C': ['P']}	9888.47	9888.47	71806	0.1377	0.1377
C9H15N4O8P	12616.4	C13-label-2	AICA ribonucleotide	S1-01	AICA ribonucleotide	{'C': ['P']}	12702	12702	71806	0.1769	0.1769
C9H15N4O8P	12336.1	C13-label-3	AICA ribonucleotide	S1-01	AICA ribonucleotide	{'C': ['P']}	12167.9	12167.9	71806	0.1695	0.1695
C9H15N4O8P	7387.97	C13-label-4	AICA ribonucleotide	S1-01	AICA ribonucleotide	{'C': ['P']}	6967.98	6967.98	71806	0.097	0.097
C9H15N4O8P	8608.22	C13-label-5	AICA ribonucleotide	S1-01	AICA ribonucleotide	{'C': ['P']}	8591.44	8591.44	71806	0.1196	0.1196
C9H15N4O8P	5207.22	C13-label-6	AICA ribonucleotide	S1-01	AICA ribonucleotide	{'C': ['P']}	4994.16	4994.16	71806	0.0696	0.0696
C9H15N4O8P	2711.9	C13-label-7	AICA ribonucleotide	S1-01	AICA ribonucleotide	{'C': ['P']}	2600.37	2600.37	71806	0.0362	0.0362
C9H15N4O8P	0	C13-label-8	AICA ribonucleotide	S1-01	AICA ribonucleotide	{'C': ['P']}	-59.6217	0	71806	0	0
C9H15N4O8P	0	C13-label-9	AICA ribonucleotide	S1-01	AICA ribonucleotide	{'C': ['P']}	0.334448	0.334448	71806	0	0
C4H6N4O3	321734	PARENT	allantoin	S1-01	allantoin	{'C': ['P']}	336425	336425	336425	1	1
C4H6N4O3	10812.8	C13-label-1	allantoin	S1-01	allantoin	{'C': ['P']}	-3756.3	0	336425	0	0
C4H6N4O3	0	C13-label-2	allantoin	S1-01	allantoin	{'C': ['P']}	-123.621	0	336425	0	0
C10H14N5O7P	2.52311e+07	PARENT	AMP	S1-01	AMP	{'C': ['P']}	2.82106e+07	2.82106e+07	3.69633e+07	0.7632	0.7632
C10H14N5O7P	3.8649e+06	C13-label-1	AMP	S1-01	AMP	{'C': ['P']}	1.14196e+06	1.14196e+06	3.69633e+07	0.0309	0.0309
C10H14N5O7P	1341.5	C13-label-10	AMP	S1-01	AMP	{'C': ['P']}	1121.6	1121.6	3.69633e+07	0	0
C10H14N5O7P	1.8763e+06	C13-label-2	AMP	S1-01	AMP	{'C': ['P']}	1.78106e+06	1.78106e+06	3.69633e+07	0.0482	0.0482
C10H14N5O7P	1.64777e+06	C13-label-3	AMP	S1-01	AMP	{'C': ['P']}	1.61383e+06	1.61383e+06	3.69633e+07	0.0437	0.0437
C10H14N5O7P	1.03892e+06	C13-label-4	AMP	S1-01	AMP	{'C': ['P']}	979121	979121	3.69633e+07	0.0265	0.0265
C10H14N5O7P	1.95537e+06	C13-label-5	AMP	S1-01	AMP	{'C': ['P']}	1.99808e+06	1.99808e+06	3.69633e+07	0.0541	0.0541
C10H14N5O7P	849874	C13-label-6	AMP	S1-01	AMP	{'C': ['P']}	775897	775897	3.69633e+07	0.021	0.021
C10H14N5O7P	359358	C13-label-7	AMP	S1-01	AMP	{'C': ['P']}	334656	334656	3.69633e+07	0.0091	0.0091
C10H14N5O7P	117540	C13-label-8	AMP	S1-01	AMP	{'C': ['P']}	108448	108448	3.69633e+07	0.0029	0.0029
C10H14N5O7P	20866.5	C13-label-9	AMP	S1-01	AMP	{'C': ['P']}	18565.1	18565.1	3.69633e+07	0.0005	0.0005
C10H18N4O6	105105	PARENT	Arginosuccinic acid	S1-01	Arginosuccinic acid	{'C': ['P']}	117516	117516	192964	0.609	0.609
C10H18N4O6	43792	C13-label-1	Arginosuccinic acid	S1-01	Arginosuccinic acid	{'C': ['P']}	35375.5	35375.5	192964	0.1833	0.1833
C10H18N4O6	20239	C13-label-2	Arginosuccinic acid	S1-01	Arginosuccinic acid	{'C': ['P']}	17943.8	17943.8	192964	0.093	0.093
C10H18N4O6	14454	C13-label-3	Arginosuccinic acid	S1-01	Arginosuccinic acid	{'C': ['P']}	13859.1	13859.1	192964	0.0718	0.0718
C10H18N4O6	8787.06	C13-label-4	Arginosuccinic acid	S1-01	Arginosuccinic acid	{'C': ['P']}	8252.51	8252.51	192964	0.0428	0.0428
C10H18N4O6	0	C13-label-5	Arginosuccinic acid	S1-01	Arginosuccinic acid	{'C': ['P']}	-586.923	0	192964	0	0
C10H18N4O6	0	C13-label-6	Arginosuccinic acid	S1-01	Arginosuccinic acid	{'C': ['P']}	16.6391	16.6391	192964	0.0001	0.0001
C10H16N5O13P3	1.78732e+06	PARENT	ATP	S1-01	ATP	{'C': ['P']}	1.99839e+06	1.99839e+06	2.46862e+06	0.8095	0.8095
C10H16N5O13P3	257838	C13-label-1	ATP	S1-01	ATP	{'C': ['P']}	63264.7	63264.7	2.46862e+06	0.0256	0.0256
C10H16N5O13P3	0	C13-label-10	ATP	S1-01	ATP	{'C': ['P']}	-18.2779	0	2.46862e+06	0	0
C10H16N5O13P3	91927.8	C13-label-2	ATP	S1-01	ATP	{'C': ['P']}	83114.2	83114.2	2.46862e+06	0.0337	0.0337
C10H16N5O13P3	95846.6	C13-label-3	ATP	S1-01	ATP	{'C': ['P']}	95646.7	95646.7	2.46862e+06	0.0387	0.0387
C10H16N5O13P3	57673.3	C13-label-4	ATP	S1-01	ATP	{'C': ['P']}	53936	53936	2.46862e+06	0.0218	0.0218
C10H16N5O13P3	99195	C13-label-5	ATP	S1-01	ATP	{'C': ['P']}	101042	101042	2.46862e+06	0.0409	0.0409
C10H16N5O13P3	50779.8	C13-label-6	ATP	S1-01	ATP	{'C': ['P']}	47386.2	47386.2	2.46862e+06	0.0192	0.0192
C10H16N5O13P3	19234.3	C13-label-7	ATP	S1-01	ATP	{'C': ['P']}	17659.3	17659.3	2.46862e+06	0.0072	0.0072
C10H16N5O13P3	7077.62	C13-label-8	ATP	S1-01	ATP	{'C': ['P']}	6612.92	6612.92	2.46862e+06	0.0027	0.0027
C10H16N5O13P3	1705.47	C13-label-9	ATP	S1-01	ATP	{'C': ['P']}	1571.01	1571.01	2.46862e+06	0.0006	0.0006
C5H11NO2	1.91286e+08	PARENT	Betaine	S1-01	Betaine	{'C': ['P']}	2.02265e+08	2.02265e+08	2.03296e+08	0.9949	0.9949
C5H11NO2	1.17218e+07	C13-label-1	Betaine	S1-01	Betaine	{'C': ['P']}	1.03129e+06	1.03129e+06	2.03296e+08	0.0051	0.0051
C5H11NO2	194071	C13-label-2	Betaine	S1-01	Betaine	{'C': ['P']}	-94320	0	2.03296e+08	0	0
C10H16N2O3S	169848	PARENT	biotin	S1-01	biotin	{'C': ['P']}	189905	189905	212891	0.892	0.892
C10H16N2O3S	39853	C13-label-1	biotin	S1-01	biotin	{'C': ['P']}	22985.1	22985.1	212891	0.108	0.108
C10H16N2O3S	0	C13-label-2	biotin	S1-01	biotin	{'C': ['P']}	-3349.14	0	212891	0	0
C9H14N4O3	38133.5	PARENT	Carnosine	S1-01	Carnosine	{'C': ['P']}	42163.3	42163.3	42165.4	0.9999	0.9999
C9H14N4O3	1846.19	C13-label-1	Carnosine	S1-01	Carnosine	{'C': ['P']}	-2193.49	0	42165.4	0	0
C9H14N4O3	0	C13-label-3	Carnosine	S1-01	Carnosine	{'C': ['P']}	2.12026	2.12026	42165.4	0.0001	0.0001
C9H14N4O3	0	C13-label-7	Carnosine	S1-01	Carnosine	{'C': ['P']}	7.42e-08	7.42e-08	42165.4	0	0
C9H14N4O3	0	C13-label-9	Carnosine	S1-01	Carnosine	{'C': ['P']}	0	0	42165.4	0	0
C9H15N3O11P2	883008	PARENT	CDP	S1-01	CDP	{'C': ['P']}	976322	976322	1.03802e+06	0.9406	0.9406
C9H15N3O11P2	88171	C13-label-1	CDP	S1-01	CDP	{'C': ['P']}	-1127.97	0	1.03802e+06	0	0
C9H15N3O11P2	8787.72	C13-label-2	CDP	S1-01	CDP	{'C': ['P']}	5271.51	5271.51	1.03802e+06	0.0051	0.0051
C9H15N3O11P2	16541.3	C13-label-3	CDP	S1-01	CDP	{'C': ['P']}	17169.2	17169.2	1.03802e+06	0.0165	0.0165
C9H15N3O11P2	13392.1	C13-label-4	CDP	S1-01	CDP	{'C': ['P']}	13001.9	13001.9	1.03802e+06	0.0125	0.0125
C9H15N3O11P2	17190.4	C13-label-5	CDP	S1-01	CDP	{'C': ['P']}	17221.7	17221.7	1.03802e+06	0.0166	0.0166
C9H15N3O11P2	8950.48	C13-label-6	CDP	S1-01	CDP	{'C': ['P']}	8474.14	8474.14	1.03802e+06	0.0082	0.0082
C9H15N3O11P2	831.85	C13-label-7	CDP	S1-01	CDP	{'C': ['P']}	555.527	555.527	1.03802e+06	0.0005	0.0005
C9H15N3O11P2	0	C13-label-8	CDP	S1-01	CDP	{'C': ['P']}	-15.5602	0	1.03802e+06	0	0
C9H15N3O11P2	0	C13-label-9	CDP	S1-01	CDP	{'C': ['P']}	0.0924187	0.0924187	1.03802e+06	0	0
C14H26N4O11P2	1.55492e+06	PARENT	CDP-choline	S1-01	CDP-choline	{'C': ['P']}	1.81792e+06	1.81792e+06	1.85329e+06	0.9809	0.9809
C14H26N4O11P2	244650	C13-label-1	CDP-choline	S1-01	CDP-choline	{'C': ['P']}	350.454	350.454	1.85329e+06	0.0002	0.0002
C14H26N4O11P2	21297.4	C13-label-2	CDP-choline	S1-01	CDP-choline	{'C': ['P']}	3916.69	3916.69	1.85329e+06	0.0021	0.0021
C14H26N4O11P2	9661.32	C13-label-3	CDP-choline	S1-01	CDP-choline	{'C': ['P']}	9493.4	9493.4	1.85329e+06	0.0051	0.0051
C14H26N4O11P2	6410.64	C13-label-4	CDP-choline	S1-01	CDP-choline	{'C': ['P']}	5948.91	5948.91	1.85329e+06	0.0032	0.0032
C14H26N4O11P2	12476.3	C13-label-5	CDP-choline	S1-01	CDP-choline	{'C': ['P']}	13068.3	13068.3	1.85329e+06	0.0071	0.0071
C14H26N4O11P2	3586.3	C13-label-6	CDP-choline	S1-01	CDP-choline	{'C': ['P']}	2580.58	2580.58	1.85329e+06	0.0014	0.0014
C14H26N4O11P2	0	C13-label-7	CDP-choline	S1-01	CDP-choline	{'C': ['P']}	-288.146	0	1.85329e+06	0	0
C14H26N4O11P2	0	C13-label-8	CDP-choline	S1-01	CDP-choline	{'C': ['P']}	11.9652	11.9652	1.85329e+06	0	0
C14H26N4O11P2	0	C13-label-9	CDP-choline	S1-01	CDP-choline	{'C': ['P']}	-0.274229	0	1.85329e+06	0	0
C11H20N4O11P2	1.33655e+06	PARENT	CDP-ethanolamine	S1-01	CDP-ethanolamine	{'C': ['P']}	1.51116e+06	1.51116e+06	1.57569e+06	0.959	0.959
C11H20N4O11P2	161515	C13-label-1	CDP-ethanolamine	S1-01	CDP-ethanolamine	{'C': ['P']}	-3924.44	0	1.57569e+06	0	0
C11H20N4O11P2	15808.8	C13-label-2	CDP-ethanolamine	S1-01	CDP-ethanolamine	{'C': ['P']}	7674.57	7674.57	1.57569e+06	0.0049	0.0049
C11H20N4O11P2	16471	C13-label-3	CDP-ethanolamine	S1-01	CDP-ethanolamine	{'C': ['P']}	16923.6	16923.6	1.57569e+06	0.0107	0.0107
C11H20N4O11P2	9987.53	C13-label-4	CDP-ethanolamine	S1-01	CDP-ethanolamine	{'C': ['P']}	9255.42	9255.42	1.57569e+06	0.0059	0.0059
C11H20N4O11P2	22202.4	C13-label-5	CDP-ethanolamine	S1-01	CDP-ethanolamine	{'C': ['P']}	22961.8	22961.8	1.57569e+06	0.0146	0.0146
C11H20N4O11P2	7382.51	C13-label-6	CDP-ethanolamine	S1-01	CDP-ethanolamine	{'C': ['P']}	6251.73	6251.73	1.57569e+06	0.004	0.004
C11H20N4O11P2	1054.23	C13-label-7	CDP-ethanolamine	S1-01	CDP-ethanolamine	{'C': ['P']}	712.497	712.497	1.57569e+06	0.0005	0.0005
C11H20N4O11P2	767.13	C13-label-8	CDP-ethanolamine	S1-01	CDP-ethanolamine	{'C': ['P']}	753.282	753.282	1.57569e+06	0.0005	0.0005
C11H20N4O11P2	0	C13-label-9	CDP-ethanolamine	S1-01	CDP-ethanolamine	{'C': ['P']}	-25.7018	0	1.57569e+06	0	0
C5H13NO	1.34104e+08	PARENT	Choline	S1-01	Choline	{'C': ['P']}	1.41802e+08	1.41802e+08	1.4244e+08	0.9955	0.9955
C5H13NO	8.13672e+06	C13-label-1	Choline	S1-01	Choline	{'C': ['P']}	638249	638249	1.4244e+08	0.0045	0.0045
C5H13NO	149494	C13-label-2	Choline	S1-01	Choline	{'C': ['P']}	-48466.9	0	1.4244e+08	0	0
C5H13NO	0	C13-label-3	Choline	S1-01	Choline	{'C': ['P']}	-797.206	0	1.4244e+08	0	0
C6H8O7	38524.6	PARENT	citric acid	S1-01	citric acid	{'C': ['P']}	41193.1	41193.1	81171.8	0.5075	0.5075
C6H8O7	12254.4	C13-label-1	citric acid	S1-01	citric acid	{'C': ['P']}	10214.3	10214.3	81171.8	0.1258	0.1258
C6H8O7	19225.4	C13-label-2	citric acid	S1-01	citric acid	{'C': ['P']}	19460.2	19460.2	81171.8	0.2397	0.2397
C6H8O7	7541.15	C13-label-3	citric acid	S1-01	citric acid	{'C': ['P']}	6920.21	6920.21	81171.8	0.0853	0.0853
C6H8O7	3548.89	C13-label-4	citric acid	S1-01	citric acid	{'C': ['P']}	3384.02	3384.02	81171.8	0.0417	0.0417
C9H14N3O8P	421972	PARENT	CMP	S1-01	CMP	{'C': ['P']}	466565	466565	494527	0.9435	0.9435
C9H14N3O8P	41396.2	C13-label-1	CMP	S1-01	CMP	{'C': ['P']}	-1347.13	0	494527	0	0
C9H14N3O8P	6563.18	C13-label-2	CMP	S1-01	CMP	{'C': ['P']}	5146.7	5146.7	494527	0.0104	0.0104
C9H14N3O8P	6019.55	C13-label-3	CMP	S1-01	CMP	{'C': ['P']}	5987.65	5987.65	494527	0.0121	0.0121
C9H14N3O8P	4197.55	C13-label-4	CMP	S1-01	CMP	{'C': ['P']}	4025.6	4025.6	494527	0.0081	0.0081
C9H14N3O8P	9023.32	C13-label-5	CMP	S1-01	CMP	{'C': ['P']}	9200.58	9200.58	494527	0.0186	0.0186
C9H14N3O8P	3398.46	C13-label-6	CMP	S1-01	CMP	{'C': ['P']}	3100.56	3100.56	494527	0.0063	0.0063
C9H14N3O8P	597.35	C13-label-7	CMP	S1-01	CMP	{'C': ['P']}	500.729	500.729	494527	0.001	0.001
C9H14N3O8P	0	C13-label-8	CMP	S1-01	CMP	{'C': ['P']}	-12.3129	0	494527	0	0
C21H36N7O16P3S	9378.53	PARENT	Coenzyme A	S1-01	Coenzyme A	{'C': ['P']}	11855.9	11855.9	12163.8	0.9747	0.9747
C21H36N7O16P3S	0	C13-label-1	Coenzyme A	S1-01	Coenzyme A	{'C': ['P']}	-2763.61	0	12163.8	0	0
C21H36N7O16P3S	0	C13-label-14	Coenzyme A	S1-01	Coenzyme A	{'C': ['P']}	0	0	12163.8	0	0
C21H36N7O16P3S	0	C13-label-2	Coenzyme A	S1-01	Coenzyme A	{'C': ['P']}	306.761	306.761	12163.8	0.0252	0.0252
C21H36N7O16P3S	0	C13-label-3	Coenzyme A	S1-01	Coenzyme A	{'C': ['P']}	-21.5653	0	12163.8	0	0
C21H36N7O16P3S	0	C13-label-4	Coenzyme A	S1-01	Coenzyme A	{'C': ['P']}	1.07719	1.07719	12163.8	0.0001	0.0001
C21H36N7O16P3S	0	C13-label-5	Coenzyme A	S1-01	Coenzyme A	{'C': ['P']}	-0.040653	0	12163.8	0	0
C21H36N7O16P3S	0	C13-label-6	Coenzyme A	S1-01	Coenzyme A	{'C': ['P']}	0.00120333	0.00120333	12163.8	0	0
C21H36N7O16P3S	0	C13-label-8	Coenzyme A	S1-01	Coenzyme A	{'C': ['P']}	5.56e-07	5.56e-07	12163.8	0	0
C4H9N3O2	2.56008e+07	PARENT	Creatine	S1-01	Creatine	{'C': ['P']}	2.67698e+07	2.67698e+07	2.6806e+07	0.9986	0.9986
C4H9N3O2	1.18447e+06	C13-label-1	Creatine	S1-01	Creatine	{'C': ['P']}	36229.9	36229.9	2.6806e+07	0.0014	0.0014
C4H9N3O2	11804.4	C13-label-2	Creatine	S1-01	Creatine	{'C': ['P']}	-8925.4	0	2.6806e+07	0	0
C4H7N3O	7.11776e+06	PARENT	Creatinine	S1-01	Creatinine	{'C': ['P']}	7.44275e+06	7.44275e+06	7.45235e+06	0.9987	0.9987
C4H7N3O	328858	C13-label-1	Creatinine	S1-01	Creatinine	{'C': ['P']}	9598.88	9598.88	7.45235e+06	0.0013	0.0013
C4H7N3O	0	C13-label-2	Creatinine	S1-01	Creatinine	{'C': ['P']}	-5821.77	0	7.45235e+06	0	0
C10H12N5O6P	244688	PARENT	cyclic-AMP	S1-01	cyclic-AMP	{'C': ['P']}	273582	273582	411748	0.6644	0.6644
C10H12N5O6P	110949	C13-label-1	cyclic-AMP	S1-01	cyclic-AMP	{'C': ['P']}	92306.4	92306.4	411748	0.2242	0.2242
C10H12N5O6P	41501.3	C13-label-2	cyclic-AMP	S1-01	cyclic-AMP	{'C': ['P']}	34639.5	34639.5	411748	0.0841	0.0841
C10H12N5O6P	13317.4	C13-label-3	cyclic-AMP	S1-01	cyclic-AMP	{'C': ['P']}	10869.3	10869.3	411748	0.0264	0.0264
C10H12N5O6P	1239.98	C13-label-4	cyclic-AMP	S1-01	cyclic-AMP	{'C': ['P']}	350.34	350.34	411748	0.0009	0.0009
C7H14N2O4S	11290.8	PARENT	Cystathionine	S1-01	Cystathionine	{'C': ['P']}	12208.3	12208.3	12208.3	1	1
C7H14N2O4S	0	C13-label-1	Cystathionine	S1-01	Cystathionine	{'C': ['P']}	-948.589	0	12208.3	0	0
C7H14N2O4S	0	C13-label-3	Cystathionine	S1-01	Cystathionine	{'C': ['P']}	-0.584378	0	12208.3	0	0
C9H13N3O5	27927.5	PARENT	Cytidine	S1-01	Cytidine	{'C': ['P']}	30878.8	30878.8	30884.7	0.9998	0.9998
C9H13N3O5	2522.13	C13-label-1	Cytidine	S1-01	Cytidine	{'C': ['P']}	-327.079	0	30884.7	0	0
C9H13N3O5	0	C13-label-2	Cytidine	S1-01	Cytidine	{'C': ['P']}	-107.92	0	30884.7	0	0
C9H13N3O5	0	C13-label-3	Cytidine	S1-01	Cytidine	{'C': ['P']}	5.96638	5.96638	30884.7	0.0002	0.0002
C9H13N3O5	0	C13-label-4	Cytidine	S1-01	Cytidine	{'C': ['P']}	-0.152142	0	30884.7	0	0
C9H13N3O5	0	C13-label-5	Cytidine	S1-01	Cytidine	{'C': ['P']}	0.00227487	0.00227487	30884.7	0	0
C9H13N3O5	0	C13-label-6	Cytidine	S1-01	Cytidine	{'C': ['P']}	-2.11711e-05	0	30884.7	0	0
C6H12O6	320362	PARENT	D-(-)-Fructose	S1-01	D-(-)-Fructose	{'C': ['P']}	342553	342553	342553	1	1
C6H12O6	21116.8	C13-label-1	D-(-)-Fructose	S1-01	D-(-)-Fructose	{'C': ['P']}	-485.178	0	342553	0	0
C6H12O6	0	C13-label-5	D-(-)-Fructose	S1-01	D-(-)-Fructose	{'C': ['P']}	0.0013485	0.0013485	342553	0	0
C6H12O6	0	C13-label-6	D-(-)-Fructose	S1-01	D-(-)-Fructose	{'C': ['P']}	-3.1219e-06	0	342553	0	0
C6H12O6	597456	PARENT	D-(+)-Glucose	S1-01	D-(+)-Glucose	{'C': ['P']}	638839	638839	646864	0.9876	0.9876
C6H12O6	36865.6	C13-label-1	D-(+)-Glucose	S1-01	D-(+)-Glucose	{'C': ['P']}	-3565.08	0	646864	0	0
C6H12O6	1125.22	C13-label-2	D-(+)-Glucose	S1-01	D-(+)-Glucose	{'C': ['P']}	193.792	193.792	646864	0.0003	0.0003
C6H12O6	671.022	C13-label-3	D-(+)-Glucose	S1-01	D-(+)-Glucose	{'C': ['P']}	672.186	672.186	646864	0.001	0.001
C6H12O6	0	C13-label-4	D-(+)-Glucose	S1-01	D-(+)-Glucose	{'C': ['P']}	-22.6238	0	646864	0	0
C6H12O6	0	C13-label-5	D-(+)-Glucose	S1-01	D-(+)-Glucose	{'C': ['P']}	0.252352	0.252352	646864	0	0
C6H12O6	7158.35	C13-label-6	D-(+)-Glucose	S1-01	D-(+)-Glucose	{'C': ['P']}	7158.35	7158.35	646864	0.0111	0.0111
C5H10O5	99990.3	PARENT	D-(+)-Xylose	S1-01	D-(+)-Xylose	{'C': ['P']}	105729	105729	105729	1	1
C5H10O5	2672.52	C13-label-1	D-(+)-Xylose	S1-01	D-(+)-Xylose	{'C': ['P']}	-3073.44	0	105729	0	0
C5H8O5	215500	PARENT	D-a-Hydroxyglutaric acid	S1-01	D-a-Hydroxyglutaric acid	{'C': ['P']}	227869	227869	238875	0.9539	0.9539
C5H8O5	12900.3	C13-label-1	D-a-Hydroxyglutaric acid	S1-01	D-a-Hydroxyglutaric acid	{'C': ['P']}	842.591	842.591	238875	0.0035	0.0035
C5H8O5	7255.86	C13-label-2	D-a-Hydroxyglutaric acid	S1-01	D-a-Hydroxyglutaric acid	{'C': ['P']}	7184.78	7184.78	238875	0.0301	0.0301
C5H8O5	2716.96	C13-label-3	D-a-Hydroxyglutaric acid	S1-01	D-a-Hydroxyglutaric acid	{'C': ['P']}	2535.31	2535.31	238875	0.0106	0.0106
C5H8O5	496.083	C13-label-4	D-a-Hydroxyglutaric acid	S1-01	D-a-Hydroxyglutaric acid	{'C': ['P']}	442.69	442.69	238875	0.0019	0.0019
C5H8O5	0	C13-label-5	D-a-Hydroxyglutaric acid	S1-01	D-a-Hydroxyglutaric acid	{'C': ['P']}	-5.23611	0	238875	0	0
C10H14N5O6P	9571.99	PARENT	dAMP	S1-01	dAMP	{'C': ['P']}	10702.3	10702.3	12388.2	0.8639	0.8639
C10H14N5O6P	1738.19	C13-label-1	dAMP	S1-01	dAMP	{'C': ['P']}	733.921	733.921	12388.2	0.0592	0.0592
C10H14N5O6P	988.679	C13-label-2	dAMP	S1-01	dAMP	{'C': ['P']}	948.369	948.369	12388.2	0.0766	0.0766
C10H14N5O6P	0	C13-label-3	dAMP	S1-01	dAMP	{'C': ['P']}	-89.2269	0	12388.2	0	0
C10H14N5O6P	0	C13-label-4	dAMP	S1-01	dAMP	{'C': ['P']}	3.54274	3.54274	12388.2	0.0003	0.0003
C10H14N5O6P	0	C13-label-5	dAMP	S1-01	dAMP	{'C': ['P']}	-0.0795713	0	12388.2	0	0
C10H14N5O6P	0	C13-label-6	dAMP	S1-01	dAMP	{'C': ['P']}	0.00111215	0.00111215	12388.2	0	0
C10H14N5O6P	0	C13-label-7	dAMP	S1-01	dAMP	{'C': ['P']}	-9.9256e-06	0	12388.2	0	0
C9H15N3O10P2	78426.3	PARENT	dCDP	S1-01	dCDP	{'C': ['P']}	86714.3	86714.3	88058.5	0.9847	0.9847
C9H15N3O10P2	7089.52	C13-label-1	dCDP	S1-01	dCDP	{'C': ['P']}	-911.044	0	88058.5	0	0
C9H15N3O10P2	1052.53	C13-label-2	dCDP	S1-01	dCDP	{'C': ['P']}	834.337	834.337	88058.5	0.0095	0.0095
C9H15N3O10P2	542.927	C13-label-3	dCDP	S1-01	dCDP	{'C': ['P']}	508.887	508.887	88058.5	0.0058	0.0058
C9H15N3O10P2	0	C13-label-4	dCDP	S1-01	dCDP	{'C': ['P']}	-36.1467	0	88058.5	0	0
C9H15N3O10P2	0	C13-label-5	dCDP	S1-01	dCDP	{'C': ['P']}	1.02483	1.02483	88058.5	0	0
C9H15N3O10P2	0	C13-label-6	dCDP	S1-01	dCDP	{'C': ['P']}	-0.015334	0	88058.5	0	0
C9H14N3O7P	93330.8	PARENT	dCMP	S1-01	dCMP	{'C': ['P']}	103194	103194	103326	0.9987	0.9987
C9H14N3O7P	8681.22	C13-label-1	dCMP	S1-01	dCMP	{'C': ['P']}	-816.977	0	103326	0	0
C9H14N3O7P	477.47	C13-label-2	dCMP	S1-01	dCMP	{'C': ['P']}	131.098	131.098	103326	0.0013	0.0013
C9H14N3O7P	0	C13-label-3	dCMP	S1-01	dCMP	{'C': ['P']}	-19.2229	0	103326	0	0
C9H14N3O7P	0	C13-label-4	dCMP	S1-01	dCMP	{'C': ['P']}	0.806222	0.806222	103326	0	0
C9H14N3O7P	0	C13-label-5	dCMP	S1-01	dCMP	{'C': ['P']}	-0.0168167	0	103326	0	0
C5H11O7P	7526.54	PARENT	deoxyribose-phosphate	S1-01	deoxyribose-phosphate	{'C': ['P']}	7958.54	7958.54	9118.82	0.8728	0.8728
C5H11O7P	614.117	C13-label-1	deoxyribose-phosphate	S1-01	deoxyribose-phosphate	{'C': ['P']}	200.459	200.459	9118.82	0.022	0.022
C5H11O7P	0	C13-label-2	deoxyribose-phosphate	S1-01	deoxyribose-phosphate	{'C': ['P']}	-18.7061	0	9118.82	0	0
C5H11O7P	408.987	C13-label-3	deoxyribose-phosphate	S1-01	deoxyribose-phosphate	{'C': ['P']}	418.586	418.586	9118.82	0.0459	0.0459
C5H11O7P	541.184	C13-label-5	deoxyribose-phosphate	S1-01	deoxyribose-phosphate	{'C': ['P']}	541.235	541.235	9118.82	0.0594	0.0594
C6H12O7	472830	PARENT	D-gluconate	S1-01	D-gluconate	{'C': ['P']}	505581	505581	528064	0.9574	0.9574
C6H12O7	32799	C13-label-1	D-gluconate	S1-01	D-gluconate	{'C': ['P']}	1009.87	1009.87	528064	0.0019	0.0019
C6H12O7	4614.13	C13-label-2	D-gluconate	S1-01	D-gluconate	{'C': ['P']}	3834.37	3834.37	528064	0.0073	0.0073
C6H12O7	6741.13	C13-label-3	D-gluconate	S1-01	D-gluconate	{'C': ['P']}	6785.36	6785.36	528064	0.0128	0.0128
C6H12O7	1042.48	C13-label-4	D-gluconate	S1-01	D-gluconate	{'C': ['P']}	837.094	837.094	528064	0.0016	0.0016
C6H12O7	0	C13-label-5	D-gluconate	S1-01	D-gluconate	{'C': ['P']}	-21.1131	0	528064	0	0
C6H12O7	10016.1	C13-label-6	D-gluconate	S1-01	D-gluconate	{'C': ['P']}	10016.2	10016.2	528064	0.019	0.019
C6H13O9P	128283	PARENT	D-Glucose 6-phosphate	S1-01	D-Glucose 6-phosphate	{'C': ['P']}	137169	137169	161311	0.8503	0.8503
C6H13O9P	13402	C13-label-1	D-Glucose 6-phosphate	S1-01	D-Glucose 6-phosphate	{'C': ['P']}	5035.8	5035.8	161311	0.0312	0.0312
C6H13O9P	6857.46	C13-label-2	D-Glucose 6-phosphate	S1-01	D-Glucose 6-phosphate	{'C': ['P']}	6637.57	6637.57	161311	0.0411	0.0411
C6H13O9P	9269.84	C13-label-3	D-Glucose 6-phosphate	S1-01	D-Glucose 6-phosphate	{'C': ['P']}	9280.84	9280.84	161311	0.0575	0.0575
C6H13O9P	2385.04	C13-label-4	D-Glucose 6-phosphate	S1-01	D-Glucose 6-phosphate	{'C': ['P']}	2124.83	2124.83	161311	0.0132	0.0132
C6H13O9P	1101.2	C13-label-5	D-Glucose 6-phosphate	S1-01	D-Glucose 6-phosphate	{'C': ['P']}	1062.92	1062.92	161311	0.0066	0.0066
C6H13O9P	0	C13-label-6	D-Glucose 6-phosphate	S1-01	D-Glucose 6-phosphate	{'C': ['P']}	-12.073	0	161311	0	0
C3H7O6P	73280.1	PARENT	D-glyceraldehdye-3-phosphate	S1-01	D-glyceraldehdye-3-phosphate	{'C': ['P']}	75775.6	75775.6	119473	0.6342	0.6342
C3H7O6P	8950.43	C13-label-1	D-glyceraldehdye-3-phosphate	S1-01	D-glyceraldehdye-3-phosphate	{'C': ['P']}	6629.16	6629.16	119473	0.0555	0.0555
C3H7O6P	0	C13-label-2	D-glyceraldehdye-3-phosphate	S1-01	D-glyceraldehdye-3-phosphate	{'C': ['P']}	-175.176	0	119473	0	0
C3H7O6P	37067.6	C13-label-3	D-glyceraldehdye-3-phosphate	S1-01	D-glyceraldehdye-3-phosphate	{'C': ['P']}	37068.7	37068.7	119473	0.3103	0.3103
C5H6N2O4	25979	PARENT	dihydroorotate	S1-01	dihydroorotate	{'C': ['P']}	27470.2	27470.2	53605.6	0.5124	0.5124
C5H6N2O4	11803	C13-label-1	dihydroorotate	S1-01	dihydroorotate	{'C': ['P']}	10817.3	10817.3	53605.6	0.2018	0.2018
C5H6N2O4	9984.02	C13-label-2	dihydroorotate	S1-01	dihydroorotate	{'C': ['P']}	9809.88	9809.88	53605.6	0.183	0.183
C5H6N2O4	4110.99	C13-label-3	dihydroorotate	S1-01	dihydroorotate	{'C': ['P']}	3868.75	3868.75	53605.6	0.0722	0.0722
C5H6N2O4	1709.89	C13-label-4	dihydroorotate	S1-01	dihydroorotate	{'C': ['P']}	1639.51	1639.51	53605.6	0.0306	0.0306
C5H6N2O4	0	C13-label-5	dihydroorotate	S1-01	dihydroorotate	{'C': ['P']}	-18.6888	0	53605.6	0	0
C3H7O6P	116705	PARENT	dihydroxy-acetone-phosphate	S1-01	dihydroxy-acetone-phosphate	{'C': ['P']}	120680	120680	125815	0.9592	0.9592
C3H7O6P	3777.41	C13-label-1	dihydroxy-acetone-phosphate	S1-01	dihydroxy-acetone-phosphate	{'C': ['P']}	-155.95	0	125815	0	0
C3H7O6P	0	C13-label-2	dihydroxy-acetone-phosphate	S1-01	dihydroxy-acetone-phosphate	{'C': ['P']}	-41.1447	0	125815	0	0
C3H7O6P	5134.58	C13-label-3	dihydroxy-acetone-phosphate	S1-01	dihydroxy-acetone-phosphate	{'C': ['P']}	5134.89	5134.89	125815	0.0408	0.0408
C6H14N4O2	1.58124e+06	PARENT	DL-Arginine	S1-01	DL-Arginine	{'C': ['P']}	1.69077e+06	1.69077e+06	1.71664e+06	0.9849	0.9849
C6H14N4O2	120459	C13-label-1	DL-Arginine	S1-01	DL-Arginine	{'C': ['P']}	14767.3	14767.3	1.71664e+06	0.0086	0.0086
C6H14N4O2	8908.59	C13-label-2	DL-Arginine	S1-01	DL-Arginine	{'C': ['P']}	5370.97	5370.97	1.71664e+06	0.0031	0.0031
C6H14N4O2	4577.59	C13-label-3	DL-Arginine	S1-01	DL-Arginine	{'C': ['P']}	4430.56	4430.56	1.71664e+06	0.0026	0.0026
C6H14N4O2	1425.64	C13-label-4	DL-Arginine	S1-01	DL-Arginine	{'C': ['P']}	1305.73	1305.73	1.71664e+06	0.0008	0.0008
C6H14N4O2	0	C13-label-5	DL-Arginine	S1-01	DL-Arginine	{'C': ['P']}	-30.6571	0	1.71664e+06	0	0
C6H14N4O2	0	C13-label-6	DL-Arginine	S1-01	DL-Arginine	{'C': ['P']}	0.173268	0.173268	1.71664e+06	0	0
C5H11O8P	18998.2	PARENT	D-Ribose-1-phosphate	S1-01	D-Ribose-1-phosphate	{'C': ['P']}	20088.6	20088.6	26606.8	0.755	0.755
C5H11O8P	1955.23	C13-label-1	D-Ribose-1-phosphate	S1-01	D-Ribose-1-phosphate	{'C': ['P']}	929.585	929.585	26606.8	0.0349	0.0349
C5H11O8P	1926.8	C13-label-2	D-Ribose-1-phosphate	S1-01	D-Ribose-1-phosphate	{'C': ['P']}	1926.39	1926.39	26606.8	0.0724	0.0724
C5H11O8P	1120.42	C13-label-3	D-Ribose-1-phosphate	S1-01	D-Ribose-1-phosphate	{'C': ['P']}	1080.61	1080.61	26606.8	0.0406	0.0406
C5H11O8P	349.335	C13-label-4	D-Ribose-1-phosphate	S1-01	D-Ribose-1-phosphate	{'C': ['P']}	328.548	328.548	26606.8	0.0123	0.0123
C5H11O8P	2256.79	C13-label-5	D-Ribose-1-phosphate	S1-01	D-Ribose-1-phosphate	{'C': ['P']}	2253.01	2253.01	26606.8	0.0847	0.0847
C7H15O10P	151585	PARENT	D-Sedoheptulose 7-phosphate	S1-01	D-Sedoheptulose 7-phosphate	{'C': ['P']}	163904	163904	204433	0.8017	0.8017
C7H15O10P	16480.7	C13-label-1	D-Sedoheptulose 7-phosphate	S1-01	D-Sedoheptulose 7-phosphate	{'C': ['P']}	4886.88	4886.88	204433	0.0239	0.0239
C7H15O10P	9767.31	C13-label-2	D-Sedoheptulose 7-phosphate	S1-01	D-Sedoheptulose 7-phosphate	{'C': ['P']}	9578.37	9578.37	204433	0.0469	0.0469
C7H15O10P	9010.52	C13-label-3	D-Sedoheptulose 7-phosphate	S1-01	D-Sedoheptulose 7-phosphate	{'C': ['P']}	8873.47	8873.47	204433	0.0434	0.0434
C7H15O10P	7783.22	C13-label-4	D-Sedoheptulose 7-phosphate	S1-01	D-Sedoheptulose 7-phosphate	{'C': ['P']}	7642.26	7642.26	204433	0.0374	0.0374
C7H15O10P	5319.61	C13-label-5	D-Sedoheptulose 7-phosphate	S1-01	D-Sedoheptulose 7-phosphate	{'C': ['P']}	5178.52	5178.52	204433	0.0253	0.0253
C7H15O10P	4368.94	C13-label-7	D-Sedoheptulose 7-phosphate	S1-01	D-Sedoheptulose 7-phosphate	{'C': ['P']}	4369.6	4369.6	204433	0.0214	0.0214
C10H16N2O11P2	200406	PARENT	dTDP	S1-01	dTDP	{'C': ['P']}	224072	224072	301967	0.742	0.742
C10H16N2O11P2	36607.7	C13-label-1	dTDP	S1-01	dTDP	{'C': ['P']}	15604.3	15604.3	301967	0.0517	0.0517
C10H16N2O11P2	4280.08	C13-label-2	dTDP	S1-01	dTDP	{'C': ['P']}	1878.64	1878.64	301967	0.0062	0.0062
C10H16N2O11P2	52260.9	C13-label-3	dTDP	S1-01	dTDP	{'C': ['P']}	56235.2	56235.2	301967	0.1862	0.1862
C10H16N2O11P2	2553.52	C13-label-4	dTDP	S1-01	dTDP	{'C': ['P']}	-1648.07	0	301967	0	0
C10H16N2O11P2	3979.74	C13-label-5	dTDP	S1-01	dTDP	{'C': ['P']}	4172.24	4172.24	301967	0.0138	0.0138
C10H16N2O11P2	0	C13-label-6	dTDP	S1-01	dTDP	{'C': ['P']}	-231.208	0	301967	0	0
C10H16N2O11P2	0	C13-label-7	dTDP	S1-01	dTDP	{'C': ['P']}	5.14018	5.14018	301967	0	0
C10H17N2O14P3	79918.3	PARENT	dTTP	S1-01	dTTP	{'C': ['P']}	89355.7	89355.7	107217	0.8334	0.8334
C10H17N2O14P3	15435.3	C13-label-1	dTTP	S1-01	dTTP	{'C': ['P']}	7147.93	7147.93	107217	0.0667	0.0667
C10H17N2O14P3	810.581	C13-label-10	dTTP	S1-01	dTTP	{'C': ['P']}	810.581	810.581	107217	0.0076	0.0076
C10H17N2O14P3	1634.5	C13-label-2	dTTP	S1-01	dTTP	{'C': ['P']}	577.668	577.668	107217	0.0054	0.0054
C10H17N2O14P3	0	C13-label-3	dTTP	S1-01	dTTP	{'C': ['P']}	-97.6667	0	107217	0	0
C10H17N2O14P3	7634.34	C13-label-4	dTTP	S1-01	dTTP	{'C': ['P']}	8167.63	8167.63	107217	0.0762	0.0762
C10H17N2O14P3	561.622	C13-label-5	dTTP	S1-01	dTTP	{'C': ['P']}	50.0843	50.0843	107217	0.0005	0.0005
C10H17N2O14P3	1075.34	C13-label-6	dTTP	S1-01	dTTP	{'C': ['P']}	1106.57	1106.57	107217	0.0103	0.0103
C10H17N2O14P3	0	C13-label-7	dTTP	S1-01	dTTP	{'C': ['P']}	-49.4167	0	107217	0	0
C10H17N2O14P3	0	C13-label-8	dTTP	S1-01	dTTP	{'C': ['P']}	0.824991	0.824991	107217	0	0
C9H13N2O8P	50176.1	PARENT	dUMP	S1-01	dUMP	{'C': ['P']}	55478.6	55478.6	80645	0.6879	0.6879
C9H13N2O8P	8063.38	C13-label-1	dUMP	S1-01	dUMP	{'C': ['P']}	3274.22	3274.22	80645	0.0406	0.0406
C9H13N2O8P	3632.51	C13-label-2	dUMP	S1-01	dUMP	{'C': ['P']}	3390.89	3390.89	80645	0.042	0.042
C9H13N2O8P	16119.7	C13-label-3	dUMP	S1-01	dUMP	{'C': ['P']}	16955.1	16955.1	80645	0.2102	0.2102
C9H13N2O8P	621.213	C13-label-4	dUMP	S1-01	dUMP	{'C': ['P']}	-481.473	0	80645	0	0
C9H13N2O8P	675.411	C13-label-5	dUMP	S1-01	dUMP	{'C': ['P']}	701.469	701.469	80645	0.0087	0.0087
C9H13N2O8P	846.91	C13-label-6	dUMP	S1-01	dUMP	{'C': ['P']}	844.732	844.732	80645	0.0105	0.0105
C9H13N2O8P	0	C13-label-9	dUMP	S1-01	dUMP	{'C': ['P']}	-0.00118706	0	80645	0	0
C18H38NO5P	49866.1	PARENT	Erythro-sphingosine 1-phosphate	S1-01	Erythro-sphingosine 1-phosphate	{'C': ['P']}	60962.5	60962.5	61264.4	0.9951	0.9951
C18H38NO5P	10210	C13-label-1	Erythro-sphingosine 1-phosphate	S1-01	Erythro-sphingosine 1-phosphate	{'C': ['P']}	163.092	163.092	61264.4	0.0027	0.0027
C18H38NO5P	0	C13-label-2	Erythro-sphingosine 1-phosphate	S1-01	Erythro-sphingosine 1-phosphate	{'C': ['P']}	-1179.99	0	61264.4	0	0
C18H38NO5P	0	C13-label-3	Erythro-sphingosine 1-phosphate	S1-01	Erythro-sphingosine 1-phosphate	{'C': ['P']}	138.799	138.799	61264.4	0.0023	0.0023
C27H33N9O15P2	48404.3	PARENT	Flavin adenine dinucleotide (FAD)	S1-01	Flavin adenine dinucleotide (FAD)	{'C': ['P']}	65428.9	65428.9	68108.8	0.9607	0.9607
C27H33N9O15P2	11920.2	C13-label-1	Flavin adenine dinucleotide (FAD)	S1-01	Flavin adenine dinucleotide (FAD)	{'C': ['P']}	-3675.14	0	68108.8	0	0
C27H33N9O15P2	0	C13-label-14	Flavin adenine dinucleotide (FAD)	S1-01	Flavin adenine dinucleotide (FAD)	{'C': ['P']}	0	0	68108.8	0	0
C27H33N9O15P2	2882.59	C13-label-2	Flavin adenine dinucleotide (FAD)	S1-01	Flavin adenine dinucleotide (FAD)	{'C': ['P']}	2041.49	2041.49	68108.8	0.03	0.03
C27H33N9O15P2	982.885	C13-label-3	Flavin adenine dinucleotide (FAD)	S1-01	Flavin adenine dinucleotide (FAD)	{'C': ['P']}	603.745	603.745	68108.8	0.0089	0.0089
C27H33N9O15P2	0	C13-label-4	Flavin adenine dinucleotide (FAD)	S1-01	Flavin adenine dinucleotide (FAD)	{'C': ['P']}	-240.661	0	68108.8	0	0
C27H33N9O15P2	0	C13-label-5	Flavin adenine dinucleotide (FAD)	S1-01	Flavin adenine dinucleotide (FAD)	{'C': ['P']}	34.4321	34.4321	68108.8	0.0005	0.0005
C27H33N9O15P2	0	C13-label-6	Flavin adenine dinucleotide (FAD)	S1-01	Flavin adenine dinucleotide (FAD)	{'C': ['P']}	-2.96517	0	68108.8	0	0
C27H33N9O15P2	0	C13-label-7	Flavin adenine dinucleotide (FAD)	S1-01	Flavin adenine dinucleotide (FAD)	{'C': ['P']}	0.178798	0.178798	68108.8	0	0
C19H19N7O6	62626.4	PARENT	Folic acid	S1-01	Folic acid	{'C': ['P']}	77421.6	77421.6	77421.6	1	1
C19H19N7O6	5711.33	C13-label-1	Folic acid	S1-01	Folic acid	{'C': ['P']}	-9345.98	0	77421.6	0	0
C6H13O9P	137208	PARENT	Fructose-6-phosphate	S1-01	Fructose-6-phosphate	{'C': ['P']}	146712	146712	152664	0.961	0.961
C6H13O9P	0	C13-label-1	Fructose-6-phosphate	S1-01	Fructose-6-phosphate	{'C': ['P']}	-9771.04	0	152664	0	0
C6H13O9P	1453.55	C13-label-2	Fructose-6-phosphate	S1-01	Fructose-6-phosphate	{'C': ['P']}	1791.06	1791.06	152664	0.0117	0.0117
C6H13O9P	1904.73	C13-label-3	Fructose-6-phosphate	S1-01	Fructose-6-phosphate	{'C': ['P']}	1898.1	1898.1	152664	0.0124	0.0124
C6H13O9P	0	C13-label-5	Fructose-6-phosphate	S1-01	Fructose-6-phosphate	{'C': ['P']}	0.719558	0.719558	152664	0	0
C6H13O9P	2261.59	C13-label-6	Fructose-6-phosphate	S1-01	Fructose-6-phosphate	{'C': ['P']}	2261.59	2261.59	152664	0.0148	0.0148
C4H4O4	846194	PARENT	fumaric acid	S1-01	fumaric acid	{'C': ['P']}	884831	884831	1.57437e+06	0.562	0.562
C4H4O4	307700	C13-label-1	fumaric acid	S1-01	fumaric acid	{'C': ['P']}	278892	278892	1.57437e+06	0.1771	0.1771
C4H4O4	286597	C13-label-2	fumaric acid	S1-01	fumaric acid	{'C': ['P']}	283126	283126	1.57437e+06	0.1798	0.1798
C4H4O4	102284	C13-label-3	fumaric acid	S1-01	fumaric acid	{'C': ['P']}	97038.6	97038.6	1.57437e+06	0.0616	0.0616
C4H4O4	31593.2	C13-label-4	fumaric acid	S1-01	fumaric acid	{'C': ['P']}	30480.8	30480.8	1.57437e+06	0.0194	0.0194
C10H15N5O11P2	1.14619e+06	PARENT	GDP	S1-01	GDP	{'C': ['P']}	1.28154e+06	1.28154e+06	1.81479e+06	0.7062	0.7062
C10H15N5O11P2	188770	C13-label-1	GDP	S1-01	GDP	{'C': ['P']}	66468	66468	1.81479e+06	0.0366	0.0366
C10H15N5O11P2	0	C13-label-10	GDP	S1-01	GDP	{'C': ['P']}	0.600899	0.600899	1.81479e+06	0	0
C10H15N5O11P2	100792	C13-label-2	GDP	S1-01	GDP	{'C': ['P']}	96460.7	96460.7	1.81479e+06	0.0532	0.0532
C10H15N5O11P2	121637	C13-label-3	GDP	S1-01	GDP	{'C': ['P']}	122451	122451	1.81479e+06	0.0675	0.0675
C10H15N5O11P2	80744.7	C13-label-4	GDP	S1-01	GDP	{'C': ['P']}	76478.6	76478.6	1.81479e+06	0.0421	0.0421
C10H15N5O11P2	111202	C13-label-5	GDP	S1-01	GDP	{'C': ['P']}	112166	112166	1.81479e+06	0.0618	0.0618
C10H15N5O11P2	41963.2	C13-label-6	GDP	S1-01	GDP	{'C': ['P']}	37506.7	37506.7	1.81479e+06	0.0207	0.0207
C10H15N5O11P2	18414	C13-label-7	GDP	S1-01	GDP	{'C': ['P']}	17235.4	17235.4	1.81479e+06	0.0095	0.0095
C10H15N5O11P2	4970.92	C13-label-8	GDP	S1-01	GDP	{'C': ['P']}	4479.92	4479.92	1.81479e+06	0.0025	0.0025
C10H15N5O11P2	0	C13-label-9	GDP	S1-01	GDP	{'C': ['P']}	-106.039	0	1.81479e+06	0	0
C7H6O4	9.29993e+06	PARENT	Gentisic acid	S1-01	Gentisic acid	{'C': ['P']}	1.00557e+07	1.00557e+07	1.007e+07	0.9986	0.9986
C7H6O4	744114	C13-label-1	Gentisic acid	S1-01	Gentisic acid	{'C': ['P']}	14326.1	14326.1	1.007e+07	0.0014	0.0014
C7H6O4	12781.2	C13-label-2	Gentisic acid	S1-01	Gentisic acid	{'C': ['P']}	-13457.5	0	1.007e+07	0	0
C6H13NO5	36425.5	PARENT	glucosamine	S1-01	glucosamine	{'C': ['P']}	38948.5	38948.5	38949.9	1	1
C6H13NO5	1866.77	C13-label-1	glucosamine	S1-01	glucosamine	{'C': ['P']}	-620.055	0	38949.9	0	0
C6H13NO5	0	C13-label-3	glucosamine	S1-01	glucosamine	{'C': ['P']}	1.36672	1.36672	38949.9	0	0
C5H8O4	33048.8	PARENT	Glutaric acid	S1-01	Glutaric acid	{'C': ['P']}	34945.7	34945.7	34945.7	1	1
C5H8O4	1567.41	C13-label-1	Glutaric acid	S1-01	Glutaric acid	{'C': ['P']}	-300.512	0	34945.7	0	0
C3H9O6P	261822	PARENT	Glycerol 3-phosphate	S1-01	Glycerol 3-phosphate	{'C': ['P']}	270737	270737	292255	0.9264	0.9264
C3H9O6P	9874.31	C13-label-1	Glycerol 3-phosphate	S1-01	Glycerol 3-phosphate	{'C': ['P']}	1081.66	1081.66	292255	0.0037	0.0037
C3H9O6P	3834.44	C13-label-2	Glycerol 3-phosphate	S1-01	Glycerol 3-phosphate	{'C': ['P']}	3753.4	3753.4	292255	0.0128	0.0128
C3H9O6P	16724.3	C13-label-3	Glycerol 3-phosphate	S1-01	Glycerol 3-phosphate	{'C': ['P']}	16682.2	16682.2	292255	0.0571	0.0571
C10H14N5O8P	673499	PARENT	GMP	S1-01	GMP	{'C': ['P']}	753032	753032	1.2528e+06	0.6011	0.6011
C10H14N5O8P	138121	C13-label-1	GMP	S1-01	GMP	{'C': ['P']}	69131.2	69131.2	1.2528e+06	0.0552	0.0552
C10H14N5O8P	0	C13-label-10	GMP	S1-01	GMP	{'C': ['P']}	0.659986	0.659986	1.2528e+06	0	0
C10H14N5O8P	99883.9	C13-label-2	GMP	S1-01	GMP	{'C': ['P']}	98132.2	98132.2	1.2528e+06	0.0783	0.0783
C10H14N5O8P	103396	C13-label-3	GMP	S1-01	GMP	{'C': ['P']}	102655	102655	1.2528e+06	0.0819	0.0819
C10H14N5O8P	64096.6	C13-label-4	GMP	S1-01	GMP	{'C': ['P']}	60211.1	60211.1	1.2528e+06	0.0481	0.0481
C10H14N5O8P	110336	C13-label-5	GMP	S1-01	GMP	{'C': ['P']}	112386	112386	1.2528e+06	0.0897	0.0897
C10H14N5O8P	42731.4	C13-label-6	GMP	S1-01	GMP	{'C': ['P']}	38328.9	38328.9	1.2528e+06	0.0306	0.0306
C10H14N5O8P	15214.1	C13-label-7	GMP	S1-01	GMP	{'C': ['P']}	13890.2	13890.2	1.2528e+06	0.0111	0.0111
C10H14N5O8P	5403.88	C13-label-8	GMP	S1-01	GMP	{'C': ['P']}	5033.44	5033.44	1.2528e+06	0.004	0.004
C10H14N5O8P	0	C13-label-9	GMP	S1-01	GMP	{'C': ['P']}	-117.095	0	1.2528e+06	0	0
C10H16N5O14P3	9077.83	PARENT	GTP	S1-01	GTP	{'C': ['P']}	10149.8	10149.8	12677.8	0.8006	0.8006
C10H16N5O14P3	887.944	C13-label-1	GTP	S1-01	GTP	{'C': ['P']}	-144.849	0	12677.8	0	0
C10H16N5O14P3	1247.78	C13-label-2	GTP	S1-01	GTP	{'C': ['P']}	1322.52	1322.52	12677.8	0.1043	0.1043
C10H16N5O14P3	0	C13-label-3	GTP	S1-01	GTP	{'C': ['P']}	-118.463	0	12677.8	0	0
C10H16N5O14P3	424.38	C13-label-4	GTP	S1-01	GTP	{'C': ['P']}	458.402	458.402	12677.8	0.0362	0.0362
C10H16N5O14P3	734.295	C13-label-5	GTP	S1-01	GTP	{'C': ['P']}	746.117	746.117	12677.8	0.0589	0.0589
C10H16N5O14P3	0	C13-label-6	GTP	S1-01	GTP	{'C': ['P']}	-42.2524	0	12677.8	0	0
C10H16N5O14P3	0	C13-label-7	GTP	S1-01	GTP	{'C': ['P']}	0.944228	0.944228	12677.8	0.0001	0.0001
C13H25NO4	1.05297e+06	PARENT	Hexanoylcarnitine	S1-01	Hexanoylcarnitine	{'C': ['P']}	1.21741e+06	1.21741e+06	1.21741e+06	1	1
C13H25NO4	148457	C13-label-1	Hexanoylcarnitine	S1-01	Hexanoylcarnitine	{'C': ['P']}	-5937.17	0	1.21741e+06	0	0
C13H25NO4	8470.16	C13-label-2	Hexanoylcarnitine	S1-01	Hexanoylcarnitine	{'C': ['P']}	-1332.25	0	1.21741e+06	0	0
C6H6O2	478206	PARENT	Hydroquinone	S1-01	Hydroquinone	{'C': ['P']}	511330	511330	511330	1	1
C6H6O2	27804	C13-label-1	Hydroquinone	S1-01	Hydroquinone	{'C': ['P']}	-4654.64	0	511330	0	0
C6H6O2	0	C13-label-2	Hydroquinone	S1-01	Hydroquinone	{'C': ['P']}	-686.681	0	511330	0	0
C2H7NO2S	7493.28	PARENT	Hypotaurine	S1-01	Hypotaurine	{'C': ['P']}	7662.45	7662.45	7662.45	1	1
C2H7NO2S	0	C13-label-1	Hypotaurine	S1-01	Hypotaurine	{'C': ['P']}	-170.106	0	7662.45	0	0
C5H4N4O	79150.5	PARENT	Hypoxanthine	S1-01	Hypoxanthine	{'C': ['P']}	83693.5	83693.5	85206.9	0.9822	0.9822
C5H4N4O	5648.32	C13-label-1	Hypoxanthine	S1-01	Hypoxanthine	{'C': ['P']}	1261.23	1261.23	85206.9	0.0148	0.0148
C5H4N4O	397.748	C13-label-2	Hypoxanthine	S1-01	Hypoxanthine	{'C': ['P']}	252.175	252.175	85206.9	0.003	0.003
C10H13N4O8P	557810	PARENT	IMP	S1-01	IMP	{'C': ['P']}	623681	623681	888306	0.7021	0.7021
C10H13N4O8P	99646.2	C13-label-1	IMP	S1-01	IMP	{'C': ['P']}	40948	40948	888306	0.0461	0.0461
C10H13N4O8P	63232.7	C13-label-2	IMP	S1-01	IMP	{'C': ['P']}	61590.3	61590.3	888306	0.0693	0.0693
C10H13N4O8P	69871.4	C13-label-3	IMP	S1-01	IMP	{'C': ['P']}	69796.5	69796.5	888306	0.0786	0.0786
C10H13N4O8P	30534.4	C13-label-4	IMP	S1-01	IMP	{'C': ['P']}	27007.1	27007.1	888306	0.0304	0.0304
C10H13N4O8P	47922.4	C13-label-5	IMP	S1-01	IMP	{'C': ['P']}	48688.9	48688.9	888306	0.0548	0.0548
C10H13N4O8P	12571.2	C13-label-6	IMP	S1-01	IMP	{'C': ['P']}	10389.7	10389.7	888306	0.0117	0.0117
C10H13N4O8P	5749.35	C13-label-7	IMP	S1-01	IMP	{'C': ['P']}	5423.07	5423.07	888306	0.0061	0.0061
C10H13N4O8P	949.51	C13-label-8	IMP	S1-01	IMP	{'C': ['P']}	782.004	782.004	888306	0.0009	0.0009
C10H13N4O8P	0	C13-label-9	IMP	S1-01	IMP	{'C': ['P']}	-19.4256	0	888306	0	0
C8H7N	25372.5	PARENT	indole	S1-01	indole	{'C': ['P']}	27742.4	27742.4	28010.2	0.9904	0.9904
C8H7N	2216.16	C13-label-1	indole	S1-01	indole	{'C': ['P']}	-67.2543	0	28010.2	0	0
C8H7N	249.462	C13-label-3	indole	S1-01	indole	{'C': ['P']}	267.855	267.855	28010.2	0.0096	0.0096
C10H12N4O5	52384.5	PARENT	inosine	S1-01	inosine	{'C': ['P']}	58570.5	58570.5	69647.7	0.841	0.841
C10H12N4O5	6964.86	C13-label-1	inosine	S1-01	inosine	{'C': ['P']}	1199.56	1199.56	69647.7	0.0172	0.0172
C10H12N4O5	2771.48	C13-label-2	inosine	S1-01	inosine	{'C': ['P']}	2585.77	2585.77	69647.7	0.0371	0.0371
C10H12N4O5	2073.32	C13-label-3	inosine	S1-01	inosine	{'C': ['P']}	1997.27	1997.27	69647.7	0.0287	0.0287
C10H12N4O5	1114.55	C13-label-4	inosine	S1-01	inosine	{'C': ['P']}	1027.32	1027.32	69647.7	0.0148	0.0148
C10H12N4O5	4100.43	C13-label-5	inosine	S1-01	inosine	{'C': ['P']}	4261.99	4261.99	69647.7	0.0612	0.0612
C10H12N4O5	0	C13-label-6	inosine	S1-01	inosine	{'C': ['P']}	-238.537	0	69647.7	0	0
C10H12N4O5	0	C13-label-7	inosine	S1-01	inosine	{'C': ['P']}	5.31068	5.31068	69647.7	0.0001	0.0001
C10H12N4O5	0	C13-label-8	inosine	S1-01	inosine	{'C': ['P']}	-0.0590339	0	69647.7	0	0
C5H6O4	561496	PARENT	Itaconic acid	S1-01	Itaconic acid	{'C': ['P']}	593724	593724	596195	0.9959	0.9959
C5H6O4	0	C13-label-1	Itaconic acid	S1-01	Itaconic acid	{'C': ['P']}	-32951.7	0	596195	0	0
C5H6O4	1681.79	C13-label-2	Itaconic acid	S1-01	Itaconic acid	{'C': ['P']}	2470.59	2470.59	596195	0.0041	0.0041
C5H6O4	0	C13-label-3	Itaconic acid	S1-01	Itaconic acid	{'C': ['P']}	-66.0306	0	596195	0	0
C5H6O4	0	C13-label-4	Itaconic acid	S1-01	Itaconic acid	{'C': ['P']}	0.687874	0.687874	596195	0	0
C5H6O4	0	C13-label-5	Itaconic acid	S1-01	Itaconic acid	{'C': ['P']}	-0.00247844	0	596195	0	0
C3H6O3	2.00895e+07	PARENT	lactate	S1-01	lactate	{'C': ['P']}	2.07736e+07	2.07736e+07	2.50014e+07	0.8309	0.8309
C3H6O3	1.34691e+06	C13-label-1	lactate	S1-01	lactate	{'C': ['P']}	685559	685559	2.50014e+07	0.0274	0.0274
C3H6O3	699324	C13-label-2	lactate	S1-01	lactate	{'C': ['P']}	684276	684276	2.50014e+07	0.0274	0.0274
C3H6O3	2.86572e+06	C13-label-3	lactate	S1-01	lactate	{'C': ['P']}	2.85801e+06	2.85801e+06	2.50014e+07	0.1143	0.1143
C3H7NO2	2.13043e+06	PARENT	L-Alanine	S1-01	L-Alanine	{'C': ['P']}	2.20297e+06	2.20297e+06	3.91796e+06	0.5623	0.5623
C3H7NO2	312281	C13-label-1	L-Alanine	S1-01	L-Alanine	{'C': ['P']}	245972	245972	3.91796e+06	0.0628	0.0628
C3H7NO2	270334	C13-label-2	L-Alanine	S1-01	L-Alanine	{'C': ['P']}	267094	267094	3.91796e+06	0.0682	0.0682
C3H7NO2	1.20492e+06	C13-label-3	L-Alanine	S1-01	L-Alanine	{'C': ['P']}	1.20192e+06	1.20192e+06	3.91796e+06	0.3068	0.3068
C4H8N2O3	715862	PARENT	L-Asparagine	S1-01	L-Asparagine	{'C': ['P']}	748548	748548	761577	0.9829	0.9829
C4H8N2O3	39543.7	C13-label-1	L-Asparagine	S1-01	L-Asparagine	{'C': ['P']}	7654.74	7654.74	761577	0.0101	0.0101
C4H8N2O3	4193.05	C13-label-2	L-Asparagine	S1-01	L-Asparagine	{'C': ['P']}	3479.43	3479.43	761577	0.0046	0.0046
C4H8N2O3	1956.73	C13-label-3	L-Asparagine	S1-01	L-Asparagine	{'C': ['P']}	1894.53	1894.53	761577	0.0025	0.0025
C4H7NO4	1.10681e+06	PARENT	L-Aspartic acid	S1-01	L-Aspartic acid	{'C': ['P']}	1.15734e+06	1.15734e+06	1.99175e+06	0.5811	0.5811
C4H7NO4	386903	C13-label-1	L-Aspartic acid	S1-01	L-Aspartic acid	{'C': ['P']}	348692	348692	1.99175e+06	0.1751	0.1751
C4H7NO4	338772	C13-label-2	L-Aspartic acid	S1-01	L-Aspartic acid	{'C': ['P']}	333953	333953	1.99175e+06	0.1677	0.1677
C4H7NO4	126155	C13-label-3	L-Aspartic acid	S1-01	L-Aspartic acid	{'C': ['P']}	120022	120022	1.99175e+06	0.0603	0.0603
C4H7NO4	33112	C13-label-4	L-Aspartic acid	S1-01	L-Aspartic acid	{'C': ['P']}	31738.1	31738.1	1.99175e+06	0.0159	0.0159
C7H15NO3	4.8092e+07	PARENT	L-Carnitine	S1-01	L-Carnitine	{'C': ['P']}	5.20003e+07	5.20003e+07	5.22194e+07	0.9958	0.9958
C7H15NO3	3.98288e+06	C13-label-1	L-Carnitine	S1-01	L-Carnitine	{'C': ['P']}	218330	218330	5.22194e+07	0.0042	0.0042
C7H15NO3	80062	C13-label-2	L-Carnitine	S1-01	L-Carnitine	{'C': ['P']}	-64429.7	0	5.22194e+07	0	0
C7H15NO3	0	C13-label-3	L-Carnitine	S1-01	L-Carnitine	{'C': ['P']}	683.234	683.234	5.22194e+07	0	0
C6H13N3O3	666243	PARENT	L-Citrulline	S1-01	L-Citrulline	{'C': ['P']}	712391	712391	828606	0.8597	0.8597
C6H13N3O3	119704	C13-label-1	L-Citrulline	S1-01	L-Citrulline	{'C': ['P']}	79129	79129	828606	0.0955	0.0955
C6H13N3O3	25137.8	C13-label-2	L-Citrulline	S1-01	L-Citrulline	{'C': ['P']}	20577.4	20577.4	828606	0.0248	0.0248
C6H13N3O3	11343.9	C13-label-3	L-Citrulline	S1-01	L-Citrulline	{'C': ['P']}	10699.6	10699.6	828606	0.0129	0.0129
C6H13N3O3	5182.25	C13-label-4	L-Citrulline	S1-01	L-Citrulline	{'C': ['P']}	4926.49	4926.49	828606	0.0059	0.0059
C6H13N3O3	984.259	C13-label-5	L-Citrulline	S1-01	L-Citrulline	{'C': ['P']}	881.865	881.865	828606	0.0011	0.0011
C6H13N3O3	0	C13-label-6	L-Citrulline	S1-01	L-Citrulline	{'C': ['P']}	-10.4106	0	828606	0	0
C5H9NO4	4.05037e+06	PARENT	L-Glutamic acid	S1-01	L-Glutamic acid	{'C': ['P']}	4.28285e+06	4.28285e+06	6.89817e+06	0.6209	0.6209
C5H9NO4	1.08275e+06	C13-label-1	L-Glutamic acid	S1-01	L-Glutamic acid	{'C': ['P']}	894487	894487	6.89817e+06	0.1297	0.1297
C5H9NO4	1.10379e+06	C13-label-2	L-Glutamic acid	S1-01	L-Glutamic acid	{'C': ['P']}	1.09638e+06	1.09638e+06	6.89817e+06	0.1589	0.1589
C5H9NO4	450819	C13-label-3	L-Glutamic acid	S1-01	L-Glutamic acid	{'C': ['P']}	423767	423767	6.89817e+06	0.0614	0.0614
C5H9NO4	166770	C13-label-4	L-Glutamic acid	S1-01	L-Glutamic acid	{'C': ['P']}	158824	158824	6.89817e+06	0.023	0.023
C5H9NO4	43677.4	C13-label-5	L-Glutamic acid	S1-01	L-Glutamic acid	{'C': ['P']}	41860.7	41860.7	6.89817e+06	0.0061	0.0061
C5H10N2O3	919402	PARENT	L-Glutamine	S1-01	L-Glutamine	{'C': ['P']}	972173	972173	1.18778e+06	0.8185	0.8185
C5H10N2O3	170460	C13-label-1	L-Glutamine	S1-01	L-Glutamine	{'C': ['P']}	124288	124288	1.18778e+06	0.1046	0.1046
C5H10N2O3	58732.2	C13-label-2	L-Glutamine	S1-01	L-Glutamine	{'C': ['P']}	54016	54016	1.18778e+06	0.0455	0.0455
C5H10N2O3	23807.6	C13-label-3	L-Glutamine	S1-01	L-Glutamine	{'C': ['P']}	22441.2	22441.2	1.18778e+06	0.0189	0.0189
C5H10N2O3	10290	C13-label-4	L-Glutamine	S1-01	L-Glutamine	{'C': ['P']}	9886.62	9886.62	1.18778e+06	0.0083	0.0083
C5H10N2O3	5090.19	C13-label-5	L-Glutamine	S1-01	L-Glutamine	{'C': ['P']}	4977.61	4977.61	1.18778e+06	0.0042	0.0042
C10H17N3O6S	159086	PARENT	L-Glutathione (reduced)	S1-01	L-Glutathione (reduced)	{'C': ['P']}	177872	177872	181003	0.9827	0.9827
C10H17N3O6S	9423.32	C13-label-1	L-Glutathione (reduced)	S1-01	L-Glutathione (reduced)	{'C': ['P']}	-9324.64	0	181003	0	0
C10H17N3O6S	2904.33	C13-label-2	L-Glutathione (reduced)	S1-01	L-Glutathione (reduced)	{'C': ['P']}	3120.94	3120.94	181003	0.0172	0.0172
C10H17N3O6S	0	C13-label-3	L-Glutathione (reduced)	S1-01	L-Glutathione (reduced)	{'C': ['P']}	-264.971	0	181003	0	0
C10H17N3O6S	0	C13-label-4	L-Glutathione (reduced)	S1-01	L-Glutathione (reduced)	{'C': ['P']}	10.3256	10.3256	181003	0.0001	0.0001
C10H17N3O6S	0	C13-label-5	L-Glutathione (reduced)	S1-01	L-Glutathione (reduced)	{'C': ['P']}	-0.230835	0	181003	0	0
C10H17N3O6S	0	C13-label-6	L-Glutathione (reduced)	S1-01	L-Glutathione (reduced)	{'C': ['P']}	0.00322321	0.00322321	181003	0	0
C20H32N6O12S2	613310	PARENT	L-Glutathione oxidized	S1-01	L-Glutathione oxidized	{'C': ['P']}	766712	766712	793757	0.9659	0.9659
C20H32N6O12S2	124321	C13-label-1	L-Glutathione oxidized	S1-01	L-Glutathione oxidized	{'C': ['P']}	-16518.6	0	793757	0	0
C20H32N6O12S2	29924.4	C13-label-2	L-Glutathione oxidized	S1-01	L-Glutathione oxidized	{'C': ['P']}	22118.4	22118.4	793757	0.0279	0.0279
C20H32N6O12S2	6497.24	C13-label-3	L-Glutathione oxidized	S1-01	L-Glutathione oxidized	{'C': ['P']}	2588.25	2588.25	793757	0.0033	0.0033
C20H32N6O12S2	2706.45	C13-label-4	L-Glutathione oxidized	S1-01	L-Glutathione oxidized	{'C': ['P']}	2295.8	2295.8	793757	0.0029	0.0029
C20H32N6O12S2	0	C13-label-5	L-Glutathione oxidized	S1-01	L-Glutathione oxidized	{'C': ['P']}	-476.818	0	793757	0	0
C20H32N6O12S2	0	C13-label-6	L-Glutathione oxidized	S1-01	L-Glutathione oxidized	{'C': ['P']}	41.9887	41.9887	793757	0.0001	0.0001
C20H32N6O12S2	0	C13-label-7	L-Glutathione oxidized	S1-01	L-Glutathione oxidized	{'C': ['P']}	-2.24056	0	793757	0	0
C20H32N6O12S2	0	C13-label-8	L-Glutathione oxidized	S1-01	L-Glutathione oxidized	{'C': ['P']}	0.0823389	0.0823389	793757	0	0
C2H5NO2	148507	PARENT	L-Glycine	S1-01	L-Glycine	{'C': ['P']}	151860	151860	160607	0.9455	0.9455
C2H5NO2	2600.71	C13-label-1	L-Glycine	S1-01	L-Glycine	{'C': ['P']}	-741.381	0	160607	0	0
C2H5NO2	8757.24	C13-label-2	L-Glycine	S1-01	L-Glycine	{'C': ['P']}	8746.75	8746.75	160607	0.0545	0.0545
C6H9N3O2	903977	PARENT	L-Histidine	S1-01	L-Histidine	{'C': ['P']}	966592	966592	966592	1	1
C6H9N3O2	44041.5	C13-label-1	L-Histidine	S1-01	L-Histidine	{'C': ['P']}	-17805.7	0	966592	0	0
C6H9N3O2	0	C13-label-2	L-Histidine	S1-01	L-Histidine	{'C': ['P']}	-798.191	0	966592	0	0
C6H13NO2	1.55904e+06	PARENT	L-Isoleucine	S1-01	L-Isoleucine	{'C': ['P']}	1.66703e+06	1.66703e+06	1.66703e+06	1	1
C6H13NO2	97026.8	C13-label-1	L-Isoleucine	S1-01	L-Isoleucine	{'C': ['P']}	-8428.2	0	1.66703e+06	0	0
C6H13NO2	2196.04	C13-label-2	L-Isoleucine	S1-01	L-Isoleucine	{'C': ['P']}	-316.836	0	1.66703e+06	0	0
C6H13NO2	2.5293e+06	PARENT	L-Leucine	S1-01	L-Leucine	{'C': ['P']}	2.70449e+06	2.70449e+06	2.70449e+06	1	1
C6H13NO2	165875	C13-label-1	L-Leucine	S1-01	L-Leucine	{'C': ['P']}	-4723.41	0	2.70449e+06	0	0
C6H13NO2	0	C13-label-2	L-Leucine	S1-01	L-Leucine	{'C': ['P']}	-4736.16	0	2.70449e+06	0	0
C6H14N2O2	1.83728e+06	PARENT	L-Lysine	S1-01	L-Lysine	{'C': ['P']}	1.96454e+06	1.96454e+06	1.96703e+06	0.9987	0.9987
C6H14N2O2	126094	C13-label-1	L-Lysine	S1-01	L-Lysine	{'C': ['P']}	2493.16	2493.16	1.96703e+06	0.0013	0.0013
C6H14N2O2	0	C13-label-2	L-Lysine	S1-01	L-Lysine	{'C': ['P']}	-3769.13	0	1.96703e+06	0	0
C9H11NO2	1.65191e+06	PARENT	L-Phenylalanine	S1-01	L-Phenylalanine	{'C': ['P']}	1.82649e+06	1.82649e+06	1.82649e+06	1	1
C9H11NO2	161685	C13-label-1	L-Phenylalanine	S1-01	L-Phenylalanine	{'C': ['P']}	-5678.49	0	1.82649e+06	0	0
C9H11NO2	4098.55	C13-label-2	L-Phenylalanine	S1-01	L-Phenylalanine	{'C': ['P']}	-3165.61	0	1.82649e+06	0	0
C9H11NO2	0	C13-label-8	L-Phenylalanine	S1-01	L-Phenylalanine	{'C': ['P']}	3.25e-08	3.25e-08	1.82649e+06	0	0
C5H9NO2	1.33293e+07	PARENT	L-Proline	S1-01	L-Proline	{'C': ['P']}	1.40944e+07	1.40944e+07	1.91883e+07	0.7345	0.7345
C5H9NO2	2.10964e+06	C13-label-1	L-Proline	S1-01	L-Proline	{'C': ['P']}	1.42373e+06	1.42373e+06	1.91883e+07	0.0742	0.0742
C5H9NO2	2.31972e+06	C13-label-2	L-Proline	S1-01	L-Proline	{'C': ['P']}	2.31814e+06	2.31814e+06	1.91883e+07	0.1208	0.1208
C5H9NO2	909080	C13-label-3	L-Proline	S1-01	L-Proline	{'C': ['P']}	851163	851163	1.91883e+07	0.0444	0.0444
C5H9NO2	428910	C13-label-4	L-Proline	S1-01	L-Proline	{'C': ['P']}	413963	413963	1.91883e+07	0.0216	0.0216
C5H9NO2	91624.8	C13-label-5	L-Proline	S1-01	L-Proline	{'C': ['P']}	86921.8	86921.8	1.91883e+07	0.0045	0.0045
C3H7NO3	544791	PARENT	L-Serine	S1-01	L-Serine	{'C': ['P']}	563342	563342	605849	0.9298	0.9298
C3H7NO3	40092.1	C13-label-1	L-Serine	S1-01	L-Serine	{'C': ['P']}	22237.9	22237.9	605849	0.0367	0.0367
C3H7NO3	13264.5	C13-label-2	L-Serine	S1-01	L-Serine	{'C': ['P']}	12711.4	12711.4	605849	0.021	0.021
C3H7NO3	7701.85	C13-label-3	L-Serine	S1-01	L-Serine	{'C': ['P']}	7557.24	7557.24	605849	0.0125	0.0125
C4H8O5	2.21316e+06	PARENT	L-Threonic acid	S1-01	L-Threonic acid	{'C': ['P']}	2.31422e+06	2.31422e+06	2.32237e+06	0.9965	0.9965
C4H8O5	104703	C13-label-1	L-Threonic acid	S1-01	L-Threonic acid	{'C': ['P']}	5517.62	5517.62	2.32237e+06	0.0024	0.0024
C4H8O5	4434.17	C13-label-2	L-Threonic acid	S1-01	L-Threonic acid	{'C': ['P']}	2639.73	2639.73	2.32237e+06	0.0011	0.0011
C4H8O5	0	C13-label-4	L-Threonic acid	S1-01	L-Threonic acid	{'C': ['P']}	0.445728	0.445728	2.32237e+06	0	0
C4H9NO3	3.11513e+06	PARENT	L-Threonine	S1-01	L-Threonine	{'C': ['P']}	3.25737e+06	3.25737e+06	3.26432e+06	0.9979	0.9979
C4H9NO3	146587	C13-label-1	L-Threonine	S1-01	L-Threonine	{'C': ['P']}	6951.91	6951.91	3.26432e+06	0.0021	0.0021
C4H9NO3	577.466	C13-label-2	L-Threonine	S1-01	L-Threonine	{'C': ['P']}	-2049.04	0	3.26432e+06	0	0
C11H12N2O2	214495	PARENT	L-Tryptophan	S1-01	L-Tryptophan	{'C': ['P']}	242516	242516	242548	0.9999	0.9999
C11H12N2O2	23850.5	C13-label-1	L-Tryptophan	S1-01	L-Tryptophan	{'C': ['P']}	-2944.16	0	242548	0	0
C11H12N2O2	0	C13-label-11	L-Tryptophan	S1-01	L-Tryptophan	{'C': ['P']}	0	0	242548	0	0
C11H12N2O2	556.618	C13-label-2	L-Tryptophan	S1-01	L-Tryptophan	{'C': ['P']}	-701.179	0	242548	0	0
C11H12N2O2	0	C13-label-3	L-Tryptophan	S1-01	L-Tryptophan	{'C': ['P']}	31.6457	31.6457	242548	0.0001	0.0001
C11H12N2O2	0	C13-label-8	L-Tryptophan	S1-01	L-Tryptophan	{'C': ['P']}	3.95e-08	3.95e-08	242548	0	0
C11H12N2O2	0	C13-label-9	L-Tryptophan	S1-01	L-Tryptophan	{'C': ['P']}	-2e-10	0	242548	0	0
C9H11NO3	173359	PARENT	L-Tyrosine	S1-01	L-Tyrosine	{'C': ['P']}	191679	191679	191836	0.9992	0.9992
C9H11NO3	155.66	C13-label-8	L-Tyrosine	S1-01	L-Tyrosine	{'C': ['P']}	157.407	157.407	191836	0.0008	0.0008
C5H11NO2	478537	PARENT	L-Valine	S1-01	L-Valine	{'C': ['P']}	506003	506003	506003	1	1
C5H11NO2	20918.1	C13-label-1	L-Valine	S1-01	L-Valine	{'C': ['P']}	-6209.95	0	506003	0	0
C5H11NO2	0	C13-label-2	L-Valine	S1-01	L-Valine	{'C': ['P']}	-347.725	0	506003	0	0
C4H6O5	5.99838e+06	PARENT	Malic acid	S1-01	Malic acid	{'C': ['P']}	6.27226e+06	6.27226e+06	8.30966e+06	0.7548	0.7548
C4H6O5	2.11966e+06	C13-label-1	Malic acid	S1-01	Malic acid	{'C': ['P']}	1.91335e+06	1.91335e+06	8.30966e+06	0.2303	0.2303
C4H6O5	0	C13-label-2	Malic acid	S1-01	Malic acid	{'C': ['P']}	-68351.5	0	8.30966e+06	0	0
C4H6O5	0	C13-label-3	Malic acid	S1-01	Malic acid	{'C': ['P']}	775.858	775.858	8.30966e+06	0.0001	0.0001
C4H6O5	123266	C13-label-4	Malic acid	S1-01	Malic acid	{'C': ['P']}	123263	123263	8.30966e+06	0.0148	0.0148
C3H4O4	91844.3	PARENT	malonic acid	S1-01	malonic acid	{'C': ['P']}	94971.9	94971.9	109048	0.8709	0.8709
C3H4O4	11002.6	C13-label-1	malonic acid	S1-01	malonic acid	{'C': ['P']}	8088.45	8088.45	109048	0.0742	0.0742
C3H4O4	5567.91	C13-label-2	malonic acid	S1-01	malonic acid	{'C': ['P']}	5415.74	5415.74	109048	0.0497	0.0497
C3H4O4	632.884	C13-label-3	malonic acid	S1-01	malonic acid	{'C': ['P']}	571.642	571.642	109048	0.0052	0.0052
C5H11NO2S	77012.9	PARENT	methionine	S1-01	methionine	{'C': ['P']}	81433.2	81433.2	81433.2	1	1
C5H11NO2S	3362.11	C13-label-1	methionine	S1-01	methionine	{'C': ['P']}	-1003.92	0	81433.2	0	0
C5H11NO2S	0	C13-label-4	methionine	S1-01	methionine	{'C': ['P']}	-0.0130513	0	81433.2	0	0
C5H8O4	55795.7	PARENT	Methylsuccinic acid	S1-01	Methylsuccinic acid	{'C': ['P']}	58998.2	58998.2	60007.9	0.9832	0.9832
C5H8O4	2748.85	C13-label-1	Methylsuccinic acid	S1-01	Methylsuccinic acid	{'C': ['P']}	-400.042	0	60007.9	0	0
C5H8O4	0	C13-label-2	Methylsuccinic acid	S1-01	Methylsuccinic acid	{'C': ['P']}	-54.9298	0	60007.9	0	0
C5H8O4	1009.68	C13-label-5	Methylsuccinic acid	S1-01	Methylsuccinic acid	{'C': ['P']}	1009.68	1009.68	60007.9	0.0168	0.0168
C6H12O6	115801	PARENT	Myoinositol	S1-01	Myoinositol	{'C': ['P']}	123822	123822	124247	0.9966	0.9966
C6H12O6	5086.5	C13-label-1	Myoinositol	S1-01	Myoinositol	{'C': ['P']}	-2868.1	0	124247	0	0
C6H12O6	425.02	C13-label-6	Myoinositol	S1-01	Myoinositol	{'C': ['P']}	425.02	425.02	124247	0.0034	0.0034
C8H18N4O2	2.09366e+06	PARENT	N3,N4-Dimethyl-L-arginine	S1-01	N3,N4-Dimethyl-L-arginine	{'C': ['P']}	2.28922e+06	2.28922e+06	2.28923e+06	1	1
C8H18N4O2	174612	C13-label-1	N3,N4-Dimethyl-L-arginine	S1-01	N3,N4-Dimethyl-L-arginine	{'C': ['P']}	-14480.3	0	2.28923e+06	0	0
C8H18N4O2	4144.32	C13-label-2	N3,N4-Dimethyl-L-arginine	S1-01	N3,N4-Dimethyl-L-arginine	{'C': ['P']}	-2341.02	0	2.28923e+06	0	0
C8H18N4O2	0	C13-label-3	N3,N4-Dimethyl-L-arginine	S1-01	N3,N4-Dimethyl-L-arginine	{'C': ['P']}	18.0536	18.0536	2.28923e+06	0	0
C8H18N4O2	0	C13-label-4	N3,N4-Dimethyl-L-arginine	S1-01	N3,N4-Dimethyl-L-arginine	{'C': ['P']}	1.58508	1.58508	2.28923e+06	0	0
C9H20N2O2	554343	PARENT	N6,N6,N6-Trimethyl-L-lysine	S1-01	N6,N6,N6-Trimethyl-L-lysine	{'C': ['P']}	612924	612924	613305	0.9994	0.9994
C9H20N2O2	45137.4	C13-label-1	N6,N6,N6-Trimethyl-L-lysine	S1-01	N6,N6,N6-Trimethyl-L-lysine	{'C': ['P']}	-11877.7	0	613305	0	0
C9H20N2O2	1890.85	C13-label-2	N6,N6,N6-Trimethyl-L-lysine	S1-01	N6,N6,N6-Trimethyl-L-lysine	{'C': ['P']}	380.591	380.591	613305	0.0006	0.0006
C9H20N2O2	0	C13-label-7	N6,N6,N6-Trimethyl-L-lysine	S1-01	N6,N6,N6-Trimethyl-L-lysine	{'C': ['P']}	-5.1083e-06	0	613305	0	0
C8H16NO9P	74322	PARENT	N-Acetyl-a-D-glucosamine 1-phosphate	S1-01	N-Acetyl-a-D-glucosamine 1-phosphate	{'C': ['P']}	81264.1	81264.1	103765	0.7832	0.7832
C8H16NO9P	7151.62	C13-label-1	N-Acetyl-a-D-glucosamine 1-phosphate	S1-01	N-Acetyl-a-D-glucosamine 1-phosphate	{'C': ['P']}	516.569	516.569	103765	0.005	0.005
C8H16NO9P	0	C13-label-3	N-Acetyl-a-D-glucosamine 1-phosphate	S1-01	N-Acetyl-a-D-glucosamine 1-phosphate	{'C': ['P']}	13.7842	13.7842	103765	0.0001	0.0001
C8H16NO9P	2056.13	C13-label-5	N-Acetyl-a-D-glucosamine 1-phosphate	S1-01	N-Acetyl-a-D-glucosamine 1-phosphate	{'C': ['P']}	2126.15	2126.15	103765	0.0205	0.0205
C8H16NO9P	13733.6	C13-label-6	N-Acetyl-a-D-glucosamine 1-phosphate	S1-01	N-Acetyl-a-D-glucosamine 1-phosphate	{'C': ['P']}	13972.8	13972.8	103765	0.1347	0.1347
C8H16NO9P	1589.59	C13-label-7	N-Acetyl-a-D-glucosamine 1-phosphate	S1-01	N-Acetyl-a-D-glucosamine 1-phosphate	{'C': ['P']}	1296.45	1296.45	103765	0.0125	0.0125
C8H16NO9P	4591.18	C13-label-8	N-Acetyl-a-D-glucosamine 1-phosphate	S1-01	N-Acetyl-a-D-glucosamine 1-phosphate	{'C': ['P']}	4575.06	4575.06	103765	0.0441	0.0441
C6H10N2O4	9431.45	PARENT	N-Acetylasparagine	S1-01	N-Acetylasparagine	{'C': ['P']}	10084.7	10084.7	10084.9	1	1
C6H10N2O4	325.994	C13-label-1	N-Acetylasparagine	S1-01	N-Acetylasparagine	{'C': ['P']}	-326.937	0	10084.9	0	0
C6H10N2O4	0	C13-label-2	N-Acetylasparagine	S1-01	N-Acetylasparagine	{'C': ['P']}	-0.493064	0	10084.9	0	0
C6H10N2O4	0	C13-label-3	N-Acetylasparagine	S1-01	N-Acetylasparagine	{'C': ['P']}	0.148868	0.148868	10084.9	0	0
C6H10N2O4	0	C13-label-4	N-Acetylasparagine	S1-01	N-Acetylasparagine	{'C': ['P']}	-0.0024179	0	10084.9	0	0
C5H9NO4	422429	PARENT	N-Acetyl-DL-serine	S1-01	N-Acetyl-DL-serine	{'C': ['P']}	446675	446675	525167	0.8505	0.8505
C5H9NO4	32105.6	C13-label-1	N-Acetyl-DL-serine	S1-01	N-Acetyl-DL-serine	{'C': ['P']}	8781.13	8781.13	525167	0.0167	0.0167
C5H9NO4	52628.1	C13-label-2	N-Acetyl-DL-serine	S1-01	N-Acetyl-DL-serine	{'C': ['P']}	53480	53480	525167	0.1018	0.1018
C5H9NO4	13705.9	C13-label-3	N-Acetyl-DL-serine	S1-01	N-Acetyl-DL-serine	{'C': ['P']}	12221.8	12221.8	525167	0.0233	0.0233
C5H9NO4	0	C13-label-4	N-Acetyl-DL-serine	S1-01	N-Acetyl-DL-serine	{'C': ['P']}	-291.173	0	525167	0	0
C5H9NO4	4007.63	C13-label-5	N-Acetyl-DL-serine	S1-01	N-Acetyl-DL-serine	{'C': ['P']}	4009.28	4009.28	525167	0.0076	0.0076
C7H11NO5	82758.7	PARENT	N-Acetylglutamic acid	S1-01	N-Acetylglutamic acid	{'C': ['P']}	89484.4	89484.4	93209.3	0.96	0.96
C7H11NO5	6464.02	C13-label-1	N-Acetylglutamic acid	S1-01	N-Acetylglutamic acid	{'C': ['P']}	-41.1814	0	93209.3	0	0
C7H11NO5	3734.61	C13-label-2	N-Acetylglutamic acid	S1-01	N-Acetylglutamic acid	{'C': ['P']}	3720.18	3720.18	93209.3	0.0399	0.0399
C7H11NO5	0	C13-label-3	N-Acetylglutamic acid	S1-01	N-Acetylglutamic acid	{'C': ['P']}	-210.677	0	93209.3	0	0
C7H11NO5	0	C13-label-4	N-Acetylglutamic acid	S1-01	N-Acetylglutamic acid	{'C': ['P']}	4.72402	4.72402	93209.3	0.0001	0.0001
C7H11NO5	0	C13-label-5	N-Acetylglutamic acid	S1-01	N-Acetylglutamic acid	{'C': ['P']}	-0.0527501	0	93209.3	0	0
C4H7NO3	42609.7	PARENT	N-Acetylglycine	S1-01	N-Acetylglycine	{'C': ['P']}	44555.3	44555.3	51655.8	0.8625	0.8625
C4H7NO3	3092.29	C13-label-1	N-Acetylglycine	S1-01	N-Acetylglycine	{'C': ['P']}	1219.34	1219.34	51655.8	0.0236	0.0236
C4H7NO3	5823.28	C13-label-2	N-Acetylglycine	S1-01	N-Acetylglycine	{'C': ['P']}	5881.2	5881.2	51655.8	0.1139	0.1139
C4H7NO3	0	C13-label-3	N-Acetylglycine	S1-01	N-Acetylglycine	{'C': ['P']}	-131.257	0	51655.8	0	0
C5H9NO3	835456	PARENT	N-Acetyl-L-alanine	S1-01	N-Acetyl-L-alanine	{'C': ['P']}	883409	883409	1.17157e+06	0.754	0.754
C5H9NO3	71518.9	C13-label-1	N-Acetyl-L-alanine	S1-01	N-Acetyl-L-alanine	{'C': ['P']}	25755.3	25755.3	1.17157e+06	0.022	0.022
C5H9NO3	115335	C13-label-2	N-Acetyl-L-alanine	S1-01	N-Acetyl-L-alanine	{'C': ['P']}	117030	117030	1.17157e+06	0.0999	0.0999
C5H9NO3	99865.3	C13-label-3	N-Acetyl-L-alanine	S1-01	N-Acetyl-L-alanine	{'C': ['P']}	98191.5	98191.5	1.17157e+06	0.0838	0.0838
C5H9NO3	13577.4	C13-label-4	N-Acetyl-L-alanine	S1-01	N-Acetyl-L-alanine	{'C': ['P']}	11506.5	11506.5	1.17157e+06	0.0098	0.0098
C5H9NO3	35814.3	C13-label-5	N-Acetyl-L-alanine	S1-01	N-Acetyl-L-alanine	{'C': ['P']}	35674.3	35674.3	1.17157e+06	0.0305	0.0305
C7H12N2O4	85482.6	PARENT	N-Acetyl-L-glutamine	S1-01	N-Acetyl-L-glutamine	{'C': ['P']}	92429.6	92429.6	104606	0.8836	0.8836
C7H12N2O4	5247.89	C13-label-1	N-Acetyl-L-glutamine	S1-01	N-Acetyl-L-glutamine	{'C': ['P']}	-1570.39	0	104606	0	0
C7H12N2O4	7496.56	C13-label-2	N-Acetyl-L-glutamine	S1-01	N-Acetyl-L-glutamine	{'C': ['P']}	7792.27	7792.27	104606	0.0745	0.0745
C7H12N2O4	1016.86	C13-label-3	N-Acetyl-L-glutamine	S1-01	N-Acetyl-L-glutamine	{'C': ['P']}	629.296	629.296	104606	0.006	0.006
C7H12N2O4	3667.26	C13-label-4	N-Acetyl-L-glutamine	S1-01	N-Acetyl-L-glutamine	{'C': ['P']}	3754.59	3754.59	104606	0.0359	0.0359
C11H19NO9	219107	PARENT	N-Acetylneuraminic acid	S1-01	N-Acetylneuraminic acid	{'C': ['P']}	247731	247731	277983	0.8912	0.8912
C11H19NO9	27759.4	C13-label-1	N-Acetylneuraminic acid	S1-01	N-Acetylneuraminic acid	{'C': ['P']}	789.532	789.532	277983	0.0028	0.0028
C11H19NO9	0	C13-label-10	N-Acetylneuraminic acid	S1-01	N-Acetylneuraminic acid	{'C': ['P']}	0.000120245	0.000120245	277983	0	0
C11H19NO9	4409.17	C13-label-2	N-Acetylneuraminic acid	S1-01	N-Acetylneuraminic acid	{'C': ['P']}	3108.72	3108.72	277983	0.0112	0.0112
C11H19NO9	22482.5	C13-label-3	N-Acetylneuraminic acid	S1-01	N-Acetylneuraminic acid	{'C': ['P']}	24211.7	24211.7	277983	0.0871	0.0871
C11H19NO9	2273.54	C13-label-4	N-Acetylneuraminic acid	S1-01	N-Acetylneuraminic acid	{'C': ['P']}	293.152	293.152	277983	0.0011	0.0011
C11H19NO9	360.717	C13-label-5	N-Acetylneuraminic acid	S1-01	N-Acetylneuraminic acid	{'C': ['P']}	279.019	279.019	277983	0.001	0.001
C11H19NO9	1502.7	C13-label-6	N-Acetylneuraminic acid	S1-01	N-Acetylneuraminic acid	{'C': ['P']}	1567.75	1567.75	277983	0.0056	0.0056
C11H19NO9	0	C13-label-7	N-Acetylneuraminic acid	S1-01	N-Acetylneuraminic acid	{'C': ['P']}	-87.5656	0	277983	0	0
C11H19NO9	0	C13-label-8	N-Acetylneuraminic acid	S1-01	N-Acetylneuraminic acid	{'C': ['P']}	1.94827	1.94827	277983	0	0
C11H19NO9	0	C13-label-9	N-Acetylneuraminic acid	S1-01	N-Acetylneuraminic acid	{'C': ['P']}	-0.0216506	0	277983	0	0
C7H14N2O3	156531	PARENT	N-Acetylornithine	S1-01	N-Acetylornithine	{'C': ['P']}	169252	169252	179527	0.9428	0.9428
C7H14N2O3	8407.74	C13-label-1	N-Acetylornithine	S1-01	N-Acetylornithine	{'C': ['P']}	-4160.74	0	179527	0	0
C7H14N2O3	0	C13-label-2	N-Acetylornithine	S1-01	N-Acetylornithine	{'C': ['P']}	-160.818	0	179527	0	0
C7H14N2O3	9325.3	C13-label-5	N-Acetylornithine	S1-01	N-Acetylornithine	{'C': ['P']}	9535.82	9535.82	179527	0.0531	0.0531
C7H14N2O3	940.95	C13-label-6	N-Acetylornithine	S1-01	N-Acetylornithine	{'C': ['P']}	739.817	739.817	179527	0.0041	0.0041
C21H27N7O14P2	1.11677e+06	PARENT	NAD+	S1-01	NAD+	{'C': ['P']}	1.41177e+06	1.41177e+06	1.70044e+06	0.8302	0.8302
C21H27N7O14P2	248122	C13-label-1	NAD+	S1-01	NAD+	{'C': ['P']}	-18902	0	1.70044e+06	0	0
C21H27N7O14P2	3638.99	C13-label-10	NAD+	S1-01	NAD+	{'C': ['P']}	3472.6	3472.6	1.70044e+06	0.002	0.002
C21H27N7O14P2	1462.89	C13-label-11	NAD+	S1-01	NAD+	{'C': ['P']}	1174.27	1174.27	1.70044e+06	0.0007	0.0007
C21H27N7O14P2	0	C13-label-12	NAD+	S1-01	NAD+	{'C': ['P']}	-155.226	0	1.70044e+06	0	0
C21H27N7O14P2	0	C13-label-13	NAD+	S1-01	NAD+	{'C': ['P']}	8.17952	8.17952	1.70044e+06	0	0
C21H27N7O14P2	530.191	C13-label-17	NAD+	S1-01	NAD+	{'C': ['P']}	554.399	554.399	1.70044e+06	0.0003	0.0003
C21H27N7O14P2	87708.2	C13-label-2	NAD+	S1-01	NAD+	{'C': ['P']}	76096.8	76096.8	1.70044e+06	0.0448	0.0448
C21H27N7O14P2	62368.3	C13-label-3	NAD+	S1-01	NAD+	{'C': ['P']}	58072.4	58072.4	1.70044e+06	0.0342	0.0342
C21H27N7O14P2	32451.6	C13-label-4	NAD+	S1-01	NAD+	{'C': ['P']}	25927.5	25927.5	1.70044e+06	0.0152	0.0152
C21H27N7O14P2	86807.2	C13-label-5	NAD+	S1-01	NAD+	{'C': ['P']}	97689.4	97689.4	1.70044e+06	0.0574	0.0574
C21H27N7O14P2	18088.2	C13-label-6	NAD+	S1-01	NAD+	{'C': ['P']}	3531.59	3531.59	1.70044e+06	0.0021	0.0021
C21H27N7O14P2	9839.75	C13-label-7	NAD+	S1-01	NAD+	{'C': ['P']}	9444.72	9444.72	1.70044e+06	0.0056	0.0056
C21H27N7O14P2	8752.38	C13-label-8	NAD+	S1-01	NAD+	{'C': ['P']}	8529.94	8529.94	1.70044e+06	0.005	0.005
C21H27N7O14P2	4817.53	C13-label-9	NAD+	S1-01	NAD+	{'C': ['P']}	4166.33	4166.33	1.70044e+06	0.0025	0.0025
C21H29N7O14P2	52421.9	PARENT	NADH	S1-01	NADH	{'C': ['P']}	66269.4	66269.4	86985.7	0.7618	0.7618
C21H29N7O14P2	14715.8	C13-label-1	NADH	S1-01	NADH	{'C': ['P']}	2949.16	2949.16	86985.7	0.0339	0.0339
C21H29N7O14P2	0	C13-label-10	NADH	S1-01	NADH	{'C': ['P']}	-56.7071	0	86985.7	0	0
C21H29N7O14P2	0	C13-label-11	NADH	S1-01	NADH	{'C': ['P']}	3.64128	3.64128	86985.7	0	0
C21H29N7O14P2	0	C13-label-19	NADH	S1-01	NADH	{'C': ['P']}	0	0	86985.7	0	0
C21H29N7O14P2	5414.36	C13-label-2	NADH	S1-01	NADH	{'C': ['P']}	4324.11	4324.11	86985.7	0.0497	0.0497
C21H29N7O14P2	2061.51	C13-label-3	NADH	S1-01	NADH	{'C': ['P']}	1418.71	1418.71	86985.7	0.0163	0.0163
C21H29N7O14P2	1053.12	C13-label-4	NADH	S1-01	NADH	{'C': ['P']}	887.993	887.993	86985.7	0.0102	0.0102
C21H29N7O14P2	6488.17	C13-label-5	NADH	S1-01	NADH	{'C': ['P']}	7556.34	7556.34	86985.7	0.0869	0.0869
C21H29N7O14P2	0	C13-label-6	NADH	S1-01	NADH	{'C': ['P']}	-1358.74	0	86985.7	0	0
C21H29N7O14P2	2027.73	C13-label-7	NADH	S1-01	NADH	{'C': ['P']}	2484.31	2484.31	86985.7	0.0286	0.0286
C21H29N7O14P2	953.37	C13-label-8	NADH	S1-01	NADH	{'C': ['P']}	727.946	727.946	86985.7	0.0084	0.0084
C21H29N7O14P2	434.13	C13-label-9	NADH	S1-01	NADH	{'C': ['P']}	364.092	364.092	86985.7	0.0042	0.0042
C21H28N7O17P3	166025	PARENT	NADP+	S1-01	NADP+	{'C': ['P']}	209881	209881	241506	0.869	0.869
C21H28N7O17P3	34940.9	C13-label-1	NADP+	S1-01	NADP+	{'C': ['P']}	-5242.82	0	241506	0	0
C21H28N7O17P3	0	C13-label-10	NADP+	S1-01	NADP+	{'C': ['P']}	6.91714	6.91714	241506	0	0
C21H28N7O17P3	0	C13-label-12	NADP+	S1-01	NADP+	{'C': ['P']}	0.00805731	0.00805731	241506	0	0
C21H28N7O17P3	10584.6	C13-label-2	NADP+	S1-01	NADP+	{'C': ['P']}	8818.65	8818.65	241506	0.0365	0.0365
C21H28N7O17P3	7114.42	C13-label-3	NADP+	S1-01	NADP+	{'C': ['P']}	6578.66	6578.66	241506	0.0272	0.0272
C21H28N7O17P3	2831.17	C13-label-4	NADP+	S1-01	NADP+	{'C': ['P']}	1911.65	1911.65	241506	0.0079	0.0079
C21H28N7O17P3	10636.7	C13-label-5	NADP+	S1-01	NADP+	{'C': ['P']}	12219.8	12219.8	241506	0.0506	0.0506
C21H28N7O17P3	2308.64	C13-label-6	NADP+	S1-01	NADP+	{'C': ['P']}	519.289	519.289	241506	0.0022	0.0022
C21H28N7O17P3	1048.75	C13-label-7	NADP+	S1-01	NADP+	{'C': ['P']}	956.902	956.902	241506	0.004	0.004
C21H28N7O17P3	673.22	C13-label-8	NADP+	S1-01	NADP+	{'C': ['P']}	613.494	613.494	241506	0.0025	0.0025
C21H28N7O17P3	0	C13-label-9	NADP+	S1-01	NADP+	{'C': ['P']}	-99.919	0	241506	0	0
C4H8O2	75462.5	PARENT	n-Butyric acid	S1-01	n-Butyric acid	{'C': ['P']}	78908.1	78908.1	101037	0.781	0.781
C4H8O2	4886.31	C13-label-1	n-Butyric acid	S1-01	n-Butyric acid	{'C': ['P']}	1549.19	1549.19	101037	0.0153	0.0153
C4H8O2	15703.9	C13-label-2	n-Butyric acid	S1-01	n-Butyric acid	{'C': ['P']}	15948.5	15948.5	101037	0.1578	0.1578
C4H8O2	1165.55	C13-label-3	n-Butyric acid	S1-01	n-Butyric acid	{'C': ['P']}	823.568	823.568	101037	0.0082	0.0082
C4H8O2	3818.45	C13-label-4	n-Butyric acid	S1-01	n-Butyric acid	{'C': ['P']}	3807.34	3807.34	101037	0.0377	0.0377
C11H19NO10	428374	PARENT	N-Glycolylneuraminic acid	S1-01	N-Glycolylneuraminic acid	{'C': ['P']}	484336	484336	510110	0.9495	0.9495
C11H19NO10	52331.6	C13-label-1	N-Glycolylneuraminic acid	S1-01	N-Glycolylneuraminic acid	{'C': ['P']}	-626.071	0	510110	0	0
C11H19NO10	0	C13-label-2	N-Glycolylneuraminic acid	S1-01	N-Glycolylneuraminic acid	{'C': ['P']}	-3212.63	0	510110	0	0
C11H19NO10	18459.2	C13-label-3	N-Glycolylneuraminic acid	S1-01	N-Glycolylneuraminic acid	{'C': ['P']}	20398.5	20398.5	510110	0.04	0.04
C11H19NO10	1624.66	C13-label-4	N-Glycolylneuraminic acid	S1-01	N-Glycolylneuraminic acid	{'C': ['P']}	-42.765	0	510110	0	0
C11H19NO10	462.395	C13-label-5	N-Glycolylneuraminic acid	S1-01	N-Glycolylneuraminic acid	{'C': ['P']}	427.707	427.707	510110	0.0008	0.0008
C11H19NO10	2189.48	C13-label-6	N-Glycolylneuraminic acid	S1-01	N-Glycolylneuraminic acid	{'C': ['P']}	2285.22	2285.22	510110	0.0045	0.0045
C11H19NO10	0	C13-label-7	N-Glycolylneuraminic acid	S1-01	N-Glycolylneuraminic acid	{'C': ['P']}	-127.64	0	510110	0	0
C11H19NO10	1362.69	C13-label-8	N-Glycolylneuraminic acid	S1-01	N-Glycolylneuraminic acid	{'C': ['P']}	1411.93	1411.93	510110	0.0028	0.0028
C11H19NO10	1269.39	C13-label-9	N-Glycolylneuraminic acid	S1-01	N-Glycolylneuraminic acid	{'C': ['P']}	1251.09	1251.09	510110	0.0025	0.0025
C6H6N2O	105717	PARENT	Nicotinamide	S1-01	Nicotinamide	{'C': ['P']}	113039	113039	113040	1	1
C6H6N2O	3043.96	C13-label-1	Nicotinamide	S1-01	Nicotinamide	{'C': ['P']}	-4309.73	0	113040	0	0
C6H6N2O	0	C13-label-3	Nicotinamide	S1-01	Nicotinamide	{'C': ['P']}	0.873818	0.873818	113040	0	0
C2H8NO4P	1.00864e+07	PARENT	O-Phosphorylethanolamine	S1-01	O-Phosphorylethanolamine	{'C': ['P']}	1.03141e+07	1.03141e+07	1.03193e+07	0.9995	0.9995
C2H8NO4P	231604	C13-label-1	O-Phosphorylethanolamine	S1-01	O-Phosphorylethanolamine	{'C': ['P']}	5231.33	5231.33	1.03193e+07	0.0005	0.0005
C2H8NO4P	524.581	C13-label-2	O-Phosphorylethanolamine	S1-01	O-Phosphorylethanolamine	{'C': ['P']}	-804.286	0	1.03193e+07	0	0
C5H12N2O2	104653	PARENT	Ornithine HCl	S1-01	Ornithine HCl	{'C': ['P']}	110660	110660	110691	0.9997	0.9997
C5H12N2O2	2268.93	C13-label-1	Ornithine HCl	S1-01	Ornithine HCl	{'C': ['P']}	-3769.11	0	110691	0	0
C5H12N2O2	0	C13-label-2	Ornithine HCl	S1-01	Ornithine HCl	{'C': ['P']}	31.0042	31.0042	110691	0.0003	0.0003
C5H4N2O4	9482.55	PARENT	orotic acid	S1-01	orotic acid	{'C': ['P']}	10026.8	10026.8	10415.8	0.9627	0.9627
C5H4N2O4	0	C13-label-1	orotic acid	S1-01	orotic acid	{'C': ['P']}	-556.488	0	10415.8	0	0
C5H4N2O4	0	C13-label-2	orotic acid	S1-01	orotic acid	{'C': ['P']}	12.354	12.354	10415.8	0.0012	0.0012
C5H4N2O4	0	C13-label-3	orotic acid	S1-01	orotic acid	{'C': ['P']}	-0.13713	0	10415.8	0	0
C5H4N2O4	372.398	C13-label-4	orotic acid	S1-01	orotic acid	{'C': ['P']}	376.579	376.579	10415.8	0.0362	0.0362
C10H12N2O8	1.18529e+06	PARENT	Orotidine	S1-01	Orotidine	{'C': ['P']}	1.32526e+06	1.32526e+06	1.3623e+06	0.9728	0.9728
C10H12N2O8	138484	C13-label-1	Orotidine	S1-01	Orotidine	{'C': ['P']}	6015.14	6015.14	1.3623e+06	0.0044	0.0044
C10H12N2O8	10210	C13-label-2	Orotidine	S1-01	Orotidine	{'C': ['P']}	3214.97	3214.97	1.3623e+06	0.0024	0.0024
C10H12N2O8	7015.46	C13-label-3	Orotidine	S1-01	Orotidine	{'C': ['P']}	7055.92	7055.92	1.3623e+06	0.0052	0.0052
C10H12N2O8	5562.53	C13-label-4	Orotidine	S1-01	Orotidine	{'C': ['P']}	5383.57	5383.57	1.3623e+06	0.004	0.004
C10H12N2O8	10907	C13-label-5	Orotidine	S1-01	Orotidine	{'C': ['P']}	11155.9	11155.9	1.3623e+06	0.0082	0.0082
C10H12N2O8	2784.26	C13-label-6	Orotidine	S1-01	Orotidine	{'C': ['P']}	2281.94	2281.94	1.3623e+06	0.0017	0.0017
C10H12N2O8	1469.41	C13-label-7	Orotidine	S1-01	Orotidine	{'C': ['P']}	1404.23	1404.23	1.3623e+06	0.001	0.001
C10H12N2O8	567.75	C13-label-8	Orotidine	S1-01	Orotidine	{'C': ['P']}	531.965	531.965	1.3623e+06	0.0004	0.0004
C10H12N2O8	0	C13-label-9	Orotidine	S1-01	Orotidine	{'C': ['P']}	-12.342	0	1.3623e+06	0	0
C2H2O4	7189.78	PARENT	Oxalic acid	S1-01	Oxalic acid	{'C': ['P']}	7352.09	7352.09	7352.09	1	1
C2H2O4	0	C13-label-1	Oxalic acid	S1-01	Oxalic acid	{'C': ['P']}	-163.216	0	7352.09	0	0
C23H45NO4	1.32118e+06	PARENT	Palmitoyl carnitine	S1-01	Palmitoyl carnitine	{'C': ['P']}	1.70788e+06	1.70788e+06	1.72648e+06	0.9892	0.9892
C23H45NO4	325234	C13-label-1	Palmitoyl carnitine	S1-01	Palmitoyl carnitine	{'C': ['P']}	-20260	0	1.72648e+06	0	0
C23H45NO4	0	C13-label-10	Palmitoyl carnitine	S1-01	Palmitoyl carnitine	{'C': ['P']}	40.7065	40.7065	1.72648e+06	0	0
C23H45NO4	34128.1	C13-label-2	Palmitoyl carnitine	S1-01	Palmitoyl carnitine	{'C': ['P']}	-5147.46	0	1.72648e+06	0	0
C23H45NO4	3680.29	C13-label-3	Palmitoyl carnitine	S1-01	Palmitoyl carnitine	{'C': ['P']}	2240.71	2240.71	1.72648e+06	0.0013	0.0013
C23H45NO4	5915.79	C13-label-4	Palmitoyl carnitine	S1-01	Palmitoyl carnitine	{'C': ['P']}	6762.2	6762.2	1.72648e+06	0.0039	0.0039
C23H45NO4	2360.94	C13-label-5	Palmitoyl carnitine	S1-01	Palmitoyl carnitine	{'C': ['P']}	1409.63	1409.63	1.72648e+06	0.0008	0.0008
C23H45NO4	3910.06	C13-label-6	Palmitoyl carnitine	S1-01	Palmitoyl carnitine	{'C': ['P']}	4299.71	4299.71	1.72648e+06	0.0025	0.0025
C23H45NO4	1406.78	C13-label-7	Palmitoyl carnitine	S1-01	Palmitoyl carnitine	{'C': ['P']}	834.811	834.811	1.72648e+06	0.0005	0.0005
C23H45NO4	2734.72	C13-label-8	Palmitoyl carnitine	S1-01	Palmitoyl carnitine	{'C': ['P']}	3010.87	3010.87	1.72648e+06	0.0017	0.0017
C23H45NO4	0	C13-label-9	Palmitoyl carnitine	S1-01	Palmitoyl carnitine	{'C': ['P']}	-517.731	0	1.72648e+06	0	0
C9H17NO5	4.90601e+06	PARENT	Pantothenic acid	S1-01	Pantothenic acid	{'C': ['P']}	5.42447e+06	5.42447e+06	5.4276e+06	0.9994	0.9994
C9H17NO5	491961	C13-label-1	Pantothenic acid	S1-01	Pantothenic acid	{'C': ['P']}	-3992.08	0	5.4276e+06	0	0
C9H17NO5	14563.9	C13-label-2	Pantothenic acid	S1-01	Pantothenic acid	{'C': ['P']}	-7958.61	0	5.4276e+06	0	0
C9H17NO5	2875.43	C13-label-7	Pantothenic acid	S1-01	Pantothenic acid	{'C': ['P']}	2940.34	2940.34	5.4276e+06	0.0005	0.0005
C9H17NO5	252.89	C13-label-8	Pantothenic acid	S1-01	Pantothenic acid	{'C': ['P']}	190.453	190.453	5.4276e+06	0	0
C4H10N3O5P	836360	PARENT	Phosphocreatine	S1-01	Phosphocreatine	{'C': ['P']}	874548	874548	874548	1	1
C4H10N3O5P	26513.3	C13-label-1	Phosphocreatine	S1-01	Phosphocreatine	{'C': ['P']}	-11413.7	0	874548	0	0
C4H10N3O5P	0	C13-label-2	Phosphocreatine	S1-01	Phosphocreatine	{'C': ['P']}	-266.441	0	874548	0	0
C7H12O4	12617.4	PARENT	Pimelic acid	S1-01	Pimelic acid	{'C': ['P']}	13642.8	13642.8	13642.8	1	1
C7H12O4	0	C13-label-1	Pimelic acid	S1-01	Pimelic acid	{'C': ['P']}	-1060.04	0	13642.8	0	0
C10H19NO4	6.70055e+06	PARENT	Pronanoyl carnitine	S1-01	Pronanoyl carnitine	{'C': ['P']}	7.49181e+06	7.49181e+06	9.2036e+06	0.814	0.814
C10H19NO4	1.81856e+06	C13-label-1	Pronanoyl carnitine	S1-01	Pronanoyl carnitine	{'C': ['P']}	1.17915e+06	1.17915e+06	9.2036e+06	0.1281	0.1281
C10H19NO4	582246	C13-label-2	Pronanoyl carnitine	S1-01	Pronanoyl carnitine	{'C': ['P']}	477295	477295	9.2036e+06	0.0519	0.0519
C10H19NO4	96361.2	C13-label-3	Pronanoyl carnitine	S1-01	Pronanoyl carnitine	{'C': ['P']}	55348.7	55348.7	9.2036e+06	0.006	0.006
C10H19NO4	4175.11	C13-label-4	Pronanoyl carnitine	S1-01	Pronanoyl carnitine	{'C': ['P']}	-1642.24	0	9.2036e+06	0	0
C10H19NO4	0	C13-label-8	Pronanoyl carnitine	S1-01	Pronanoyl carnitine	{'C': ['P']}	0.000679789	0.000679789	9.2036e+06	0	0
C8H13N2O5P	32976.1	PARENT	Pyridoxamine 5-phosphate	S1-01	Pyridoxamine 5-phosphate	{'C': ['P']}	36056.3	36056.3	36059.6	0.9999	0.9999
C8H13N2O5P	2175.16	C13-label-1	Pyridoxamine 5-phosphate	S1-01	Pyridoxamine 5-phosphate	{'C': ['P']}	-849.861	0	36059.6	0	0
C8H13N2O5P	0	C13-label-2	Pyridoxamine 5-phosphate	S1-01	Pyridoxamine 5-phosphate	{'C': ['P']}	-58.3556	0	36059.6	0	0
C8H13N2O5P	0	C13-label-3	Pyridoxamine 5-phosphate	S1-01	Pyridoxamine 5-phosphate	{'C': ['P']}	3.32397	3.32397	36059.6	0.0001	0.0001
C5H11O8P	51575	PARENT	Ribose 5-P	S1-01	Ribose 5-P	{'C': ['P']}	54535.3	54535.3	64072.1	0.8512	0.8512
C5H11O8P	4796.3	C13-label-1	Ribose 5-P	S1-01	Ribose 5-P	{'C': ['P']}	1988.59	1988.59	64072.1	0.031	0.031
C5H11O8P	3058.26	C13-label-2	Ribose 5-P	S1-01	Ribose 5-P	{'C': ['P']}	3006.92	3006.92	64072.1	0.0469	0.0469
C5H11O8P	2944.73	C13-label-3	Ribose 5-P	S1-01	Ribose 5-P	{'C': ['P']}	2908.86	2908.86	64072.1	0.0454	0.0454
C5H11O8P	0	C13-label-4	Ribose 5-P	S1-01	Ribose 5-P	{'C': ['P']}	-65.7031	0	64072.1	0	0
C5H11O8P	1632.12	C13-label-5	Ribose 5-P	S1-01	Ribose 5-P	{'C': ['P']}	1632.49	1632.49	64072.1	0.0255	0.0255
C14H20N6O5S	63416.6	PARENT	S-adenosylhomocysteine	S1-01	S-adenosylhomocysteine	{'C': ['P']}	74142.9	74142.9	90078	0.8231	0.8231
C14H20N6O5S	14592	C13-label-1	S-adenosylhomocysteine	S1-01	S-adenosylhomocysteine	{'C': ['P']}	5348.96	5348.96	90078	0.0594	0.0594
C14H20N6O5S	3552.08	C13-label-2	S-adenosylhomocysteine	S1-01	S-adenosylhomocysteine	{'C': ['P']}	2458.04	2458.04	90078	0.0273	0.0273
C14H20N6O5S	3795.89	C13-label-3	S-adenosylhomocysteine	S1-01	S-adenosylhomocysteine	{'C': ['P']}	3876.05	3876.05	90078	0.043	0.043
C14H20N6O5S	796.245	C13-label-4	S-adenosylhomocysteine	S1-01	S-adenosylhomocysteine	{'C': ['P']}	393.799	393.799	90078	0.0044	0.0044
C14H20N6O5S	3023.34	C13-label-5	S-adenosylhomocysteine	S1-01	S-adenosylhomocysteine	{'C': ['P']}	3272.04	3272.04	90078	0.0363	0.0363
C14H20N6O5S	835.37	C13-label-6	S-adenosylhomocysteine	S1-01	S-adenosylhomocysteine	{'C': ['P']}	583.443	583.443	90078	0.0065	0.0065
C14H20N6O5S	0	C13-label-7	S-adenosylhomocysteine	S1-01	S-adenosylhomocysteine	{'C': ['P']}	-66.4074	0	90078	0	0
C14H20N6O5S	0	C13-label-8	S-adenosylhomocysteine	S1-01	S-adenosylhomocysteine	{'C': ['P']}	2.76959	2.76959	90078	0	0
C6H14O6	781204	PARENT	Sorbitol	S1-01	Sorbitol	{'C': ['P']}	835315	835315	876725	0.9528	0.9528
C6H14O6	52394.1	C13-label-1	Sorbitol	S1-01	Sorbitol	{'C': ['P']}	-230.545	0	876725	0	0
C6H14O6	4899.35	C13-label-2	Sorbitol	S1-01	Sorbitol	{'C': ['P']}	3592.06	3592.06	876725	0.0041	0.0041
C6H14O6	6305.04	C13-label-3	Sorbitol	S1-01	Sorbitol	{'C': ['P']}	6337.7	6337.7	876725	0.0072	0.0072
C6H14O6	2150.07	C13-label-4	Sorbitol	S1-01	Sorbitol	{'C': ['P']}	1984.72	1984.72	876725	0.0023	0.0023
C6H14O6	2474.11	C13-label-5	Sorbitol	S1-01	Sorbitol	{'C': ['P']}	2455.45	2455.45	876725	0.0028	0.0028
C6H14O6	27068.1	C13-label-6	Sorbitol	S1-01	Sorbitol	{'C': ['P']}	27040.6	27040.6	876725	0.0308	0.0308
C10H26N4	369871	PARENT	Spermine tetrahydrochloride	S1-01	Spermine tetrahydrochloride	{'C': ['P']}	413548	413548	413548	1	1
C10H26N4	23190	C13-label-1	Spermine tetrahydrochloride	S1-01	Spermine tetrahydrochloride	{'C': ['P']}	-20263.2	0	413548	0	0
C10H26N4	0	C13-label-2	Spermine tetrahydrochloride	S1-01	Spermine tetrahydrochloride	{'C': ['P']}	-268.604	0	413548	0	0
C8H14O4	23423.5	PARENT	Suberic acid	S1-01	Suberic acid	{'C': ['P']}	25611.3	25611.3	25611.3	1	1
C8H14O4	1611.91	C13-label-1	Suberic acid	S1-01	Suberic acid	{'C': ['P']}	-531.377	0	25611.3	0	0
C8H14O4	0	C13-label-5	Suberic acid	S1-01	Suberic acid	{'C': ['P']}	0.000684374	0.000684374	25611.3	0	0
C4H6O4	1.42964e+06	PARENT	Succinic acid	S1-01	Succinic acid	{'C': ['P']}	1.49492e+06	1.49492e+06	2.07094e+06	0.7219	0.7219
C4H6O4	307365	C13-label-1	Succinic acid	S1-01	Succinic acid	{'C': ['P']}	251457	251457	2.07094e+06	0.1214	0.1214
C4H6O4	241170	C13-label-2	Succinic acid	S1-01	Succinic acid	{'C': ['P']}	237136	237136	2.07094e+06	0.1145	0.1145
C4H6O4	70800.8	C13-label-3	Succinic acid	S1-01	Succinic acid	{'C': ['P']}	66229.9	66229.9	2.07094e+06	0.032	0.032
C4H6O4	21955.2	C13-label-4	Succinic acid	S1-01	Succinic acid	{'C': ['P']}	21190.4	21190.4	2.07094e+06	0.0102	0.0102
C12H22O11	54771.3	PARENT	Sucrose	S1-01	Sucrose	{'C': ['P']}	62621.6	62621.6	62621.6	1	1
C12H22O11	6519.39	C13-label-1	Sucrose	S1-01	Sucrose	{'C': ['P']}	-970.12	0	62621.6	0	0
C12H22O11	0	C13-label-10	Sucrose	S1-01	Sucrose	{'C': ['P']}	0	0	62621.6	0	0
C12H22O11	0	C13-label-2	Sucrose	S1-01	Sucrose	{'C': ['P']}	-390.779	0	62621.6	0	0
C2H7NO3S	1.79195e+07	PARENT	Taurine	S1-01	Taurine	{'C': ['P']}	1.8324e+07	1.8324e+07	1.83256e+07	0.9999	0.9999
C2H7NO3S	403862	C13-label-1	Taurine	S1-01	Taurine	{'C': ['P']}	1601.9	1601.9	1.83256e+07	0.0001	0.0001
C2H7NO3S	0	C13-label-2	Taurine	S1-01	Taurine	{'C': ['P']}	-2275.48	0	1.83256e+07	0	0
C9H14N2O12P2	1.54109e+06	PARENT	UDP	S1-01	UDP	{'C': ['P']}	1.70395e+06	1.70395e+06	2.32415e+06	0.7332	0.7332
C9H14N2O12P2	243313	C13-label-1	UDP	S1-01	UDP	{'C': ['P']}	95814.8	95814.8	2.32415e+06	0.0412	0.0412
C9H14N2O12P2	109086	C13-label-2	UDP	S1-01	UDP	{'C': ['P']}	101884	101884	2.32415e+06	0.0438	0.0438
C9H14N2O12P2	135273	C13-label-3	UDP	S1-01	UDP	{'C': ['P']}	136200	136200	2.32415e+06	0.0586	0.0586
C9H14N2O12P2	78685.8	C13-label-4	UDP	S1-01	UDP	{'C': ['P']}	73857	73857	2.32415e+06	0.0318	0.0318
C9H14N2O12P2	137090	C13-label-5	UDP	S1-01	UDP	{'C': ['P']}	138994	138994	2.32415e+06	0.0598	0.0598
C9H14N2O12P2	54702	C13-label-6	UDP	S1-01	UDP	{'C': ['P']}	50298.7	50298.7	2.32415e+06	0.0216	0.0216
C9H14N2O12P2	19020.2	C13-label-7	UDP	S1-01	UDP	{'C': ['P']}	17670.8	17670.8	2.32415e+06	0.0076	0.0076
C9H14N2O12P2	5825.37	C13-label-8	UDP	S1-01	UDP	{'C': ['P']}	5479.11	5479.11	2.32415e+06	0.0024	0.0024
C9H14N2O12P2	0	C13-label-9	UDP	S1-01	UDP	{'C': ['P']}	-63.0662	0	2.32415e+06	0	0
C15H24N2O17P2	105040	PARENT	UDP-Hexose	S1-01	UDP-Hexose	{'C': ['P']}	124185	124185	362958	0.3421	0.3421
C15H24N2O17P2	0	C13-label-1	UDP-Hexose	S1-01	UDP-Hexose	{'C': ['P']}	-20676.7	0	362958	0	0
C15H24N2O17P2	6105.45	C13-label-10	UDP-Hexose	S1-01	UDP-Hexose	{'C': ['P']}	6013.87	6013.87	362958	0.0166	0.0166
C15H24N2O17P2	6081.1	C13-label-11	UDP-Hexose	S1-01	UDP-Hexose	{'C': ['P']}	6012.94	6012.94	362958	0.0166	0.0166
C15H24N2O17P2	3525.84	C13-label-12	UDP-Hexose	S1-01	UDP-Hexose	{'C': ['P']}	3371.35	3371.35	362958	0.0093	0.0093
C15H24N2O17P2	480.844	C13-label-13	UDP-Hexose	S1-01	UDP-Hexose	{'C': ['P']}	374.904	374.904	362958	0.001	0.001
C15H24N2O17P2	0	C13-label-14	UDP-Hexose	S1-01	UDP-Hexose	{'C': ['P']}	-9.60238	0	362958	0	0
C15H24N2O17P2	0	C13-label-15	UDP-Hexose	S1-01	UDP-Hexose	{'C': ['P']}	0.0556914	0.0556914	362958	0	0
C15H24N2O17P2	30729.6	C13-label-2	UDP-Hexose	S1-01	UDP-Hexose	{'C': ['P']}	37135	37135	362958	0.1023	0.1023
C15H24N2O17P2	35919.6	C13-label-3	UDP-Hexose	S1-01	UDP-Hexose	{'C': ['P']}	35864	35864	362958	0.0988	0.0988
C15H24N2O17P2	21635	C13-label-4	UDP-Hexose	S1-01	UDP-Hexose	{'C': ['P']}	19335.1	19335.1	362958	0.0533	0.0533
C15H24N2O17P2	27622.7	C13-label-5	UDP-Hexose	S1-01	UDP-Hexose	{'C': ['P']}	28217.9	28217.9	362958	0.0777	0.0777
C15H24N2O17P2	74583.9	C13-label-6	UDP-Hexose	S1-01	UDP-Hexose	{'C': ['P']}	79191.4	79191.4	362958	0.2182	0.2182
C15H24N2O17P2	14954.3	C13-label-7	UDP-Hexose	S1-01	UDP-Hexose	{'C': ['P']}	8278.76	8278.76	362958	0.0228	0.0228
C15H24N2O17P2	9046.4	C13-label-8	UDP-Hexose	S1-01	UDP-Hexose	{'C': ['P']}	8690.44	8690.44	362958	0.0239	0.0239
C15H24N2O17P2	6547.03	C13-label-9	UDP-Hexose	S1-01	UDP-Hexose	{'C': ['P']}	6287.52	6287.52	362958	0.0173	0.0173
C17H27N3O17P2	535581	PARENT	UDP-N-acetylglucosamine	S1-01	UDP-N-acetylglucosamine	{'C': ['P']}	647492	647492	1.53889e+06	0.4208	0.4208
C17H27N3O17P2	162310	C13-label-1	UDP-N-acetylglucosamine	S1-01	UDP-N-acetylglucosamine	{'C': ['P']}	71865.6	71865.6	1.53889e+06	0.0467	0.0467
C17H27N3O17P2	18107.6	C13-label-10	UDP-N-acetylglucosamine	S1-01	UDP-N-acetylglucosamine	{'C': ['P']}	17522.4	17522.4	1.53889e+06	0.0114	0.0114
C17H27N3O17P2	21019.8	C13-label-11	UDP-N-acetylglucosamine	S1-01	UDP-N-acetylglucosamine	{'C': ['P']}	21039	21039	1.53889e+06	0.0137	0.0137
C17H27N3O17P2	7881.46	C13-label-12	UDP-N-acetylglucosamine	S1-01	UDP-N-acetylglucosamine	{'C': ['P']}	6885.68	6885.68	1.53889e+06	0.0045	0.0045
C17H27N3O17P2	7829.74	C13-label-13	UDP-N-acetylglucosamine	S1-01	UDP-N-acetylglucosamine	{'C': ['P']}	7765.34	7765.34	1.53889e+06	0.005	0.005
C17H27N3O17P2	3035.92	C13-label-14	UDP-N-acetylglucosamine	S1-01	UDP-N-acetylglucosamine	{'C': ['P']}	2785.46	2785.46	1.53889e+06	0.0018	0.0018
C17H27N3O17P2	723.876	C13-label-15	UDP-N-acetylglucosamine	S1-01	UDP-N-acetylglucosamine	{'C': ['P']}	641.622	641.622	1.53889e+06	0.0004	0.0004
C17H27N3O17P2	143128	C13-label-2	UDP-N-acetylglucosamine	S1-01	UDP-N-acetylglucosamine	{'C': ['P']}	145602	145602	1.53889e+06	0.0946	0.0946
C17H27N3O17P2	120987	C13-label-3	UDP-N-acetylglucosamine	S1-01	UDP-N-acetylglucosamine	{'C': ['P']}	115543	115543	1.53889e+06	0.0751	0.0751
C17H27N3O17P2	79300.7	C13-label-4	UDP-N-acetylglucosamine	S1-01	UDP-N-acetylglucosamine	{'C': ['P']}	71767.1	71767.1	1.53889e+06	0.0466	0.0466
C17H27N3O17P2	96871.6	C13-label-5	UDP-N-acetylglucosamine	S1-01	UDP-N-acetylglucosamine	{'C': ['P']}	99011.4	99011.4	1.53889e+06	0.0643	0.0643
C17H27N3O17P2	179781	C13-label-6	UDP-N-acetylglucosamine	S1-01	UDP-N-acetylglucosamine	{'C': ['P']}	189329	189329	1.53889e+06	0.123	0.123
C17H27N3O17P2	60498.9	C13-label-7	UDP-N-acetylglucosamine	S1-01	UDP-N-acetylglucosamine	{'C': ['P']}	43691	43691	1.53889e+06	0.0284	0.0284
C17H27N3O17P2	76853.7	C13-label-8	UDP-N-acetylglucosamine	S1-01	UDP-N-acetylglucosamine	{'C': ['P']}	78812.1	78812.1	1.53889e+06	0.0512	0.0512
C17H27N3O17P2	24960.9	C13-label-9	UDP-N-acetylglucosamine	S1-01	UDP-N-acetylglucosamine	{'C': ['P']}	19133.4	19133.4	1.53889e+06	0.0124	0.0124
C9H13N2O9P	2.52293e+06	PARENT	UMP	S1-01	UMP	{'C': ['P']}	2.78955e+06	2.78955e+06	3.93076e+06	0.7097	0.7097
C9H13N2O9P	408030	C13-label-1	UMP	S1-01	UMP	{'C': ['P']}	167466	167466	3.93076e+06	0.0426	0.0426
C9H13N2O9P	214971	C13-label-2	UMP	S1-01	UMP	{'C': ['P']}	205197	205197	3.93076e+06	0.0522	0.0522
C9H13N2O9P	218100	C13-label-3	UMP	S1-01	UMP	{'C': ['P']}	216365	216365	3.93076e+06	0.055	0.055
C9H13N2O9P	159188	C13-label-4	UMP	S1-01	UMP	{'C': ['P']}	153366	153366	3.93076e+06	0.039	0.039
C9H13N2O9P	244688	C13-label-5	UMP	S1-01	UMP	{'C': ['P']}	246938	246938	3.93076e+06	0.0628	0.0628
C9H13N2O9P	108191	C13-label-6	UMP	S1-01	UMP	{'C': ['P']}	100716	100716	3.93076e+06	0.0256	0.0256
C9H13N2O9P	40469.6	C13-label-7	UMP	S1-01	UMP	{'C': ['P']}	37844.7	37844.7	3.93076e+06	0.0096	0.0096
C9H13N2O9P	12986.3	C13-label-8	UMP	S1-01	UMP	{'C': ['P']}	12253.3	12253.3	3.93076e+06	0.0031	0.0031
C9H13N2O9P	1209.15	C13-label-9	UMP	S1-01	UMP	{'C': ['P']}	1068.33	1068.33	3.93076e+06	0.0003	0.0003
C4H4N2O2	124027	PARENT	Uracil	S1-01	Uracil	{'C': ['P']}	129690	129690	129690	1	1
C4H4N2O2	4607.21	C13-label-1	Uracil	S1-01	Uracil	{'C': ['P']}	-994.157	0	129690	0	0
C4H4N2O2	0	C13-label-2	Uracil	S1-01	Uracil	{'C': ['P']}	-62.7695	0	129690	0	0
C5H8N2O5	62107.4	PARENT	Ureidosuccinic acid	S1-01	Ureidosuccinic acid	{'C': ['P']}	65672.2	65672.2	88924.1	0.7385	0.7385
C5H8N2O5	13479.5	C13-label-1	Ureidosuccinic acid	S1-01	Ureidosuccinic acid	{'C': ['P']}	10450.1	10450.1	88924.1	0.1175	0.1175
C5H8N2O5	8303.5	C13-label-2	Ureidosuccinic acid	S1-01	Ureidosuccinic acid	{'C': ['P']}	8041.36	8041.36	88924.1	0.0904	0.0904
C5H8N2O5	3742.27	C13-label-3	Ureidosuccinic acid	S1-01	Ureidosuccinic acid	{'C': ['P']}	3550.36	3550.36	88924.1	0.0399	0.0399
C5H8N2O5	1277.53	C13-label-4	Ureidosuccinic acid	S1-01	Ureidosuccinic acid	{'C': ['P']}	1210.02	1210.02	88924.1	0.0136	0.0136
C5H4N4O3	248513	PARENT	Uric acid	S1-01	Uric acid	{'C': ['P']}	262777	262777	263100	0.9988	0.9988
C5H4N4O3	0	C13-label-1	Uric acid	S1-01	Uric acid	{'C': ['P']}	-14584.1	0	263100	0	0
C5H4N4O3	0	C13-label-2	Uric acid	S1-01	Uric acid	{'C': ['P']}	323.767	323.767	263100	0.0012	0.0012
C5H4N4O3	0	C13-label-3	Uric acid	S1-01	Uric acid	{'C': ['P']}	-3.59381	0	263100	0	0
C9H12N2O6	63813.3	PARENT	Uridine	S1-01	Uridine	{'C': ['P']}	70557	70557	84182.9	0.8381	0.8381
C9H12N2O6	7372	C13-label-1	Uridine	S1-01	Uridine	{'C': ['P']}	1011.94	1011.94	84182.9	0.012	0.012
C9H12N2O6	3784.14	C13-label-2	Uridine	S1-01	Uridine	{'C': ['P']}	3688.85	3688.85	84182.9	0.0438	0.0438
C9H12N2O6	3979.46	C13-label-3	Uridine	S1-01	Uridine	{'C': ['P']}	3956.88	3956.88	84182.9	0.047	0.047
C9H12N2O6	2720.58	C13-label-4	Uridine	S1-01	Uridine	{'C': ['P']}	2603.45	2603.45	84182.9	0.0309	0.0309
C9H12N2O6	0	C13-label-5	Uridine	S1-01	Uridine	{'C': ['P']}	-151.984	0	84182.9	0	0
C9H12N2O6	2282.8	C13-label-6	Uridine	S1-01	Uridine	{'C': ['P']}	2363.97	2363.97	84182.9	0.0281	0.0281
C9H12N2O6	0	C13-label-7	Uridine	S1-01	Uridine	{'C': ['P']}	-78.6443	0	84182.9	0	0
C9H12N2O6	0	C13-label-8	Uridine	S1-01	Uridine	{'C': ['P']}	0.872739	0.872739	84182.9	0	0
C9H15N2O15P3	103673	PARENT	UTP	S1-01	UTP	{'C': ['P']}	114629	114629	151575	0.7563	0.7563
C9H15N2O15P3	15947.6	C13-label-1	UTP	S1-01	UTP	{'C': ['P']}	5985.76	5985.76	151575	0.0395	0.0395
C9H15N2O15P3	5985.62	C13-label-2	UTP	S1-01	UTP	{'C': ['P']}	5432.08	5432.08	151575	0.0358	0.0358
C9H15N2O15P3	7688.64	C13-label-3	UTP	S1-01	UTP	{'C': ['P']}	7765.31	7765.31	151575	0.0512	0.0512
C9H15N2O15P3	5883.87	C13-label-4	UTP	S1-01	UTP	{'C': ['P']}	5689.69	5689.69	151575	0.0375	0.0375
C9H15N2O15P3	7788.68	C13-label-5	UTP	S1-01	UTP	{'C': ['P']}	7813.91	7813.91	151575	0.0516	0.0516
C9H15N2O15P3	3354.69	C13-label-6	UTP	S1-01	UTP	{'C': ['P']}	3114.76	3114.76	151575	0.0205	0.0205
C9H15N2O15P3	1226.14	C13-label-7	UTP	S1-01	UTP	{'C': ['P']}	1144.24	1144.24	151575	0.0075	0.0075
C9H15N2O15P3	0	C13-label-8	UTP	S1-01	UTP	{'C': ['P']}	-26.5967	0	151575	0	0
C5H4N4O2	80683.7	PARENT	Xanthine	S1-01	Xanthine	{'C': ['P']}	85314.7	85314.7	85314.7	1	1
C5H4N4O2	3477.15	C13-label-1	Xanthine	S1-01	Xanthine	{'C': ['P']}	-1099.05	0	85314.7	0	0
C5H4N4O2	0	C13-label-2	Xanthine	S1-01	Xanthine	{'C': ['P']}	-56.3186	0	85314.7	0	0
C10H12N4O6	20344.7	PARENT	Xanthosine	S1-01	Xanthosine	{'C': ['P']}	22747.2	22747.2	30635.2	0.7425	0.7425
C10H12N4O6	4154.44	C13-label-1	Xanthosine	S1-01	Xanthosine	{'C': ['P']}	2068.53	2068.53	30635.2	0.0675	0.0675
C10H12N4O6	2350.99	C13-label-2	Xanthosine	S1-01	Xanthosine	{'C': ['P']}	2237.81	2237.81	30635.2	0.073	0.073
C10H12N4O6	1708.98	C13-label-3	Xanthosine	S1-01	Xanthosine	{'C': ['P']}	1636.23	1636.23	30635.2	0.0534	0.0534
C10H12N4O6	417.848	C13-label-4	Xanthosine	S1-01	Xanthosine	{'C': ['P']}	311.625	311.625	30635.2	0.0102	0.0102
C10H12N4O6	1566.98	C13-label-5	Xanthosine	S1-01	Xanthosine	{'C': ['P']}	1631.75	1631.75	30635.2	0.0533	0.0533
C10H12N4O6	0	C13-label-7	Xanthosine	S1-01	Xanthosine	{'C': ['P']}	2.03022	2.03022	30635.2	0.0001	0.0001
C11H15N2O8P	22804.7	PARENT	?-Nicotinamide mononucleotide	S1-30	?-Nicotinamide mononucleotide	{'C': ['P']}	25783.8	25783.8	37130.2	0.6944	0.6944
C11H15N2O8P	10382.4	C13-label-3	?-Nicotinamide mononucleotide	S1-30	?-Nicotinamide mononucleotide	{'C': ['P']}	11346.4	11346.4	37130.2	0.3056	0.3056
C7H11N3O2	65204.6	PARENT	1-methylhistidine	S1-30	1-methylhistidine	{'C': ['P']}	70503.7	70503.7	71902.1	0.9806	0.9806
C7H11N3O2	6431.15	C13-label-1	1-methylhistidine	S1-30	1-methylhistidine	{'C': ['P']}	1398.48	1398.48	71902.1	0.0194	0.0194
C6H11NO4	74657.7	PARENT	2-Aminoadipic acid	S1-30	2-Aminoadipic acid	{'C': ['P']}	79828.9	79828.9	79828.9	1	1
C6H11NO4	2957.17	C13-label-1	2-Aminoadipic acid	S1-30	2-Aminoadipic acid	{'C': ['P']}	-2189.71	0	79828.9	0	0
C9H13N3O4	30496.3	PARENT	2'-Deoxycytidine	S1-30	2'-Deoxycytidine	{'C': ['P']}	33719.1	33719.1	33719.1	1	1
C9H13N3O4	2423.63	C13-label-1	2'-Deoxycytidine	S1-30	2'-Deoxycytidine	{'C': ['P']}	-718.532	0	33719.1	0	0
C9H13N3O4	0	C13-label-5	2'-Deoxycytidine	S1-30	2'-Deoxycytidine	{'C': ['P']}	0.00210011	0.00210011	33719.1	0	0
C4H8O3	160195	PARENT	2-Hydroxybutyric acid	S1-30	2-Hydroxybutyric acid	{'C': ['P']}	167509	167509	191862	0.8731	0.8731
C4H8O3	5702.96	C13-label-1	2-Hydroxybutyric acid	S1-30	2-Hydroxybutyric acid	{'C': ['P']}	-1540.23	0	191862	0	0
C4H8O3	12827.6	C13-label-2	2-Hydroxybutyric acid	S1-30	2-Hydroxybutyric acid	{'C': ['P']}	13044.7	13044.7	191862	0.068	0.068
C4H8O3	1937.9	C13-label-3	2-Hydroxybutyric acid	S1-30	2-Hydroxybutyric acid	{'C': ['P']}	1669.72	1669.72	191862	0.0087	0.0087
C4H8O3	9658.62	C13-label-4	2-Hydroxybutyric acid	S1-30	2-Hydroxybutyric acid	{'C': ['P']}	9638.48	9638.48	191862	0.0502	0.0502
C6H10O4	312086	PARENT	2-Methylglutaric acid	S1-30	2-Methylglutaric acid	{'C': ['P']}	333703	333703	333703	1	1
C6H10O4	15726.3	C13-label-1	2-Methylglutaric acid	S1-30	2-Methylglutaric acid	{'C': ['P']}	-5595.68	0	333703	0	0
C6H10O4	0	C13-label-2	2-Methylglutaric acid	S1-30	2-Methylglutaric acid	{'C': ['P']}	-306.174	0	333703	0	0
C6H10O4	0	C13-label-5	2-Methylglutaric acid	S1-30	2-Methylglutaric acid	{'C': ['P']}	0.000924811	0.000924811	333703	0	0
C5H6O5	475966	PARENT	2-oxoglutarate	S1-30	2-oxoglutarate	{'C': ['P']}	503285	503285	723091	0.696	0.696
C5H6O5	83313.5	C13-label-1	2-oxoglutarate	S1-30	2-oxoglutarate	{'C': ['P']}	59185.3	59185.3	723091	0.0819	0.0819
C5H6O5	107536	C13-label-2	2-oxoglutarate	S1-30	2-oxoglutarate	{'C': ['P']}	107950	107950	723091	0.1493	0.1493
C5H6O5	38829.4	C13-label-3	2-oxoglutarate	S1-30	2-oxoglutarate	{'C': ['P']}	36060.6	36060.6	723091	0.0499	0.0499
C5H6O5	13179.5	C13-label-4	2-oxoglutarate	S1-30	2-oxoglutarate	{'C': ['P']}	12486.7	12486.7	723091	0.0173	0.0173
C5H6O5	4266.27	C13-label-5	2-oxoglutarate	S1-30	2-oxoglutarate	{'C': ['P']}	4123.08	4123.08	723091	0.0057	0.0057
C6H10O5	544008	PARENT	3-Hydroxy-3-methylglutaric acid	S1-30	3-Hydroxy-3-methylglutaric acid	{'C': ['P']}	581689	581689	722207	0.8054	0.8054
C6H10O5	43306	C13-label-1	3-Hydroxy-3-methylglutaric acid	S1-30	3-Hydroxy-3-methylglutaric acid	{'C': ['P']}	7051.13	7051.13	722207	0.0098	0.0098
C6H10O5	84364	C13-label-2	3-Hydroxy-3-methylglutaric acid	S1-30	3-Hydroxy-3-methylglutaric acid	{'C': ['P']}	86749.7	86749.7	722207	0.1201	0.1201
C6H10O5	9912.04	C13-label-3	3-Hydroxy-3-methylglutaric acid	S1-30	3-Hydroxy-3-methylglutaric acid	{'C': ['P']}	6373.29	6373.29	722207	0.0088	0.0088
C6H10O5	29570.3	C13-label-4	3-Hydroxy-3-methylglutaric acid	S1-30	3-Hydroxy-3-methylglutaric acid	{'C': ['P']}	29961.3	29961.3	722207	0.0415	0.0415
C6H10O5	3192.44	C13-label-5	3-Hydroxy-3-methylglutaric acid	S1-30	3-Hydroxy-3-methylglutaric acid	{'C': ['P']}	2560.3	2560.3	722207	0.0035	0.0035
C6H10O5	7854.8	C13-label-6	3-Hydroxy-3-methylglutaric acid	S1-30	3-Hydroxy-3-methylglutaric acid	{'C': ['P']}	7822.68	7822.68	722207	0.0108	0.0108
C4H8O3	487268	PARENT	3-Hydroxybutyric acid	S1-30	3-Hydroxybutyric acid	{'C': ['P']}	509517	509517	509517	1	1
C4H8O3	12389.4	C13-label-1	3-Hydroxybutyric acid	S1-30	3-Hydroxybutyric acid	{'C': ['P']}	-9811.25	0	509517	0	0
C4H8O3	0	C13-label-2	3-Hydroxybutyric acid	S1-30	3-Hydroxybutyric acid	{'C': ['P']}	-49.9511	0	509517	0	0
C7H11N3O2	579830	PARENT	3-Methyl-L-histidine	S1-30	3-Methyl-L-histidine	{'C': ['P']}	626952	626952	626952	1	1
C7H11N3O2	29440.3	C13-label-1	3-Methyl-L-histidine	S1-30	3-Methyl-L-histidine	{'C': ['P']}	-17234.7	0	626952	0	0
C7H11N3O2	0	C13-label-2	3-Methyl-L-histidine	S1-30	3-Methyl-L-histidine	{'C': ['P']}	-474.353	0	626952	0	0
C3H7O7P	115324	PARENT	3-Phosphoglyceric acid	S1-30	3-Phosphoglyceric acid	{'C': ['P']}	119252	119252	125015	0.9539	0.9539
C3H7O7P	1584.67	C13-label-1	3-Phosphoglyceric acid	S1-30	3-Phosphoglyceric acid	{'C': ['P']}	-2350.64	0	125015	0	0
C3H7O7P	1048.27	C13-label-2	3-Phosphoglyceric acid	S1-30	3-Phosphoglyceric acid	{'C': ['P']}	1068.15	1068.15	125015	0.0085	0.0085
C3H7O7P	4706.7	C13-label-3	3-Phosphoglyceric acid	S1-30	3-Phosphoglyceric acid	{'C': ['P']}	4694.97	4694.97	125015	0.0376	0.0376
C4H8N2O3	149947	PARENT	3-Ureidopropionic acid	S1-30	3-Ureidopropionic acid	{'C': ['P']}	156794	156794	156794	1	1
C4H8N2O3	2657.59	C13-label-1	3-Ureidopropionic acid	S1-30	3-Ureidopropionic acid	{'C': ['P']}	-4213.55	0	156794	0	0
C4H8O3	32638.7	PARENT	4-Hydroxybutyric acid (GHB)	S1-30	4-Hydroxybutyric acid (GHB)	{'C': ['P']}	34129	34129	35725.5	0.9553	0.9553
C4H8O3	0	C13-label-1	4-Hydroxybutyric acid (GHB)	S1-30	4-Hydroxybutyric acid (GHB)	{'C': ['P']}	-1515.33	0	35725.5	0	0
C4H8O3	1536.62	C13-label-2	4-Hydroxybutyric acid (GHB)	S1-30	4-Hydroxybutyric acid (GHB)	{'C': ['P']}	1596.54	1596.54	35725.5	0.0447	0.0447
C5H9NO3	687829	PARENT	4-hydroxy-proline	S1-30	4-hydroxy-proline	{'C': ['P']}	727308	727308	728657	0.9981	0.9981
C5H9NO3	29729.8	C13-label-1	4-hydroxy-proline	S1-30	4-hydroxy-proline	{'C': ['P']}	-9278.29	0	728657	0	0
C5H9NO3	1772.67	C13-label-2	4-hydroxy-proline	S1-30	4-hydroxy-proline	{'C': ['P']}	1348.87	1348.87	728657	0.0019	0.0019
C5H13O14P3	17161.2	PARENT	5-phosphoribosyl-1-pyrophosphate	S1-30	5-phosphoribosyl-1-pyrophosphate	{'C': ['P']}	18146.2	18146.2	18168.5	0.9988	0.9988
C5H13O14P3	0	C13-label-1	5-phosphoribosyl-1-pyrophosphate	S1-30	5-phosphoribosyl-1-pyrophosphate	{'C': ['P']}	-1007.11	0	18168.5	0	0
C5H13O14P3	0	C13-label-2	5-phosphoribosyl-1-pyrophosphate	S1-30	5-phosphoribosyl-1-pyrophosphate	{'C': ['P']}	22.3579	22.3579	18168.5	0.0012	0.0012
C5H13O14P3	0	C13-label-3	5-phosphoribosyl-1-pyrophosphate	S1-30	5-phosphoribosyl-1-pyrophosphate	{'C': ['P']}	-0.248172	0	18168.5	0	0
C5H13O14P3	0	C13-label-4	5-phosphoribosyl-1-pyrophosphate	S1-30	5-phosphoribosyl-1-pyrophosphate	{'C': ['P']}	0.00137736	0.00137736	18168.5	0	0
C5H13O14P3	0	C13-label-5	5-phosphoribosyl-1-pyrophosphate	S1-30	5-phosphoribosyl-1-pyrophosphate	{'C': ['P']}	-3.0577e-06	0	18168.5	0	0
C11H15N5O3S	69037.5	PARENT	5'-S-Methyl-5'-thioadenosine	S1-30	5'-S-Methyl-5'-thioadenosine	{'C': ['P']}	78056.5	78056.5	80239.2	0.9728	0.9728
C11H15N5O3S	7477.14	C13-label-1	5'-S-Methyl-5'-thioadenosine	S1-30	5'-S-Methyl-5'-thioadenosine	{'C': ['P']}	-1170.58	0	80239.2	0	0
C11H15N5O3S	0	C13-label-2	5'-S-Methyl-5'-thioadenosine	S1-30	5'-S-Methyl-5'-thioadenosine	{'C': ['P']}	-399.019	0	80239.2	0	0
C11H15N5O3S	0	C13-label-3	5'-S-Methyl-5'-thioadenosine	S1-30	5'-S-Methyl-5'-thioadenosine	{'C': ['P']}	28.7381	28.7381	80239.2	0.0004	0.0004
C11H15N5O3S	0	C13-label-4	5'-S-Methyl-5'-thioadenosine	S1-30	5'-S-Methyl-5'-thioadenosine	{'C': ['P']}	-0.980991	0	80239.2	0	0
C11H15N5O3S	2010.77	C13-label-5	5'-S-Methyl-5'-thioadenosine	S1-30	5'-S-Methyl-5'-thioadenosine	{'C': ['P']}	2150.06	2150.06	80239.2	0.0268	0.0268
C11H15N5O3S	0	C13-label-6	5'-S-Methyl-5'-thioadenosine	S1-30	5'-S-Methyl-5'-thioadenosine	{'C': ['P']}	-143.193	0	80239.2	0	0
C11H15N5O3S	0	C13-label-7	5'-S-Methyl-5'-thioadenosine	S1-30	5'-S-Methyl-5'-thioadenosine	{'C': ['P']}	3.9736	3.9736	80239.2	0	0
C7H15NO2	7.682e+06	PARENT	Acetylcholine	S1-30	Acetylcholine	{'C': ['P']}	8.3063e+06	8.3063e+06	8.3063e+06	1	1
C7H15NO2	554954	C13-label-1	Acetylcholine	S1-30	Acetylcholine	{'C': ['P']}	-52005.5	0	8.3063e+06	0	0
C7H15NO2	6956.87	C13-label-2	Acetylcholine	S1-30	Acetylcholine	{'C': ['P']}	-10672.1	0	8.3063e+06	0	0
C23H38N7O17P3S	116198	PARENT	acetyl-CoA	S1-30	acetyl-CoA	{'C': ['P']}	150209	150209	164873	0.9111	0.9111
C23H38N7O17P3S	30789	C13-label-1	acetyl-CoA	S1-30	acetyl-CoA	{'C': ['P']}	1010.65	1010.65	164873	0.0061	0.0061
C23H38N7O17P3S	14376	C13-label-2	acetyl-CoA	S1-30	acetyl-CoA	{'C': ['P']}	13244.4	13244.4	164873	0.0803	0.0803
C23H38N7O17P3S	0	C13-label-22	acetyl-CoA	S1-30	acetyl-CoA	{'C': ['P']}	0	0	164873	0	0
C23H38N7O17P3S	0	C13-label-3	acetyl-CoA	S1-30	acetyl-CoA	{'C': ['P']}	-3479.85	0	164873	0	0
C23H38N7O17P3S	0	C13-label-4	acetyl-CoA	S1-30	acetyl-CoA	{'C': ['P']}	407.52	407.52	164873	0.0025	0.0025
C23H38N7O17P3S	0	C13-label-5	acetyl-CoA	S1-30	acetyl-CoA	{'C': ['P']}	-29.5378	0	164873	0	0
C23H38N7O17P3S	0	C13-label-6	acetyl-CoA	S1-30	acetyl-CoA	{'C': ['P']}	1.50489	1.50489	164873	0	0
C23H38N7O17P3S	0	C13-label-7	acetyl-CoA	S1-30	acetyl-CoA	{'C': ['P']}	-0.0575874	0	164873	0	0
C23H38N7O17P3S	0	C13-label-8	acetyl-CoA	S1-30	acetyl-CoA	{'C': ['P']}	0.00172216	0.00172216	164873	0	0
C9H17NO4	1.94267e+08	PARENT	Acetyl-L-carnitine	S1-30	Acetyl-L-carnitine	{'C': ['P']}	2.14796e+08	2.14796e+08	2.7065e+08	0.7936	0.7936
C9H17NO4	2.80612e+07	C13-label-1	Acetyl-L-carnitine	S1-30	Acetyl-L-carnitine	{'C': ['P']}	9.22409e+06	9.22409e+06	2.7065e+08	0.0341	0.0341
C9H17NO4	4.47499e+07	C13-label-2	Acetyl-L-carnitine	S1-30	Acetyl-L-carnitine	{'C': ['P']}	4.66148e+07	4.66148e+07	2.7065e+08	0.1722	0.1722
C9H17NO4	3.34772e+06	C13-label-3	Acetyl-L-carnitine	S1-30	Acetyl-L-carnitine	{'C': ['P']}	-98865.8	0	2.7065e+08	0	0
C9H17NO4	122877	C13-label-4	Acetyl-L-carnitine	S1-30	Acetyl-L-carnitine	{'C': ['P']}	14785.2	14785.2	2.7065e+08	0.0001	0.0001
C5H5N5	733331	PARENT	Adenine	S1-30	Adenine	{'C': ['P']}	775423	775423	783369	0.9899	0.9899
C5H5N5	43890.8	C13-label-1	Adenine	S1-30	Adenine	{'C': ['P']}	2858.94	2858.94	783369	0.0036	0.0036
C5H5N5	5965	C13-label-2	Adenine	S1-30	Adenine	{'C': ['P']}	5085.79	5085.79	783369	0.0065	0.0065
C5H5N5	0	C13-label-3	Adenine	S1-30	Adenine	{'C': ['P']}	-182.075	0	783369	0	0
C5H5N5	0	C13-label-4	Adenine	S1-30	Adenine	{'C': ['P']}	2.08771	2.08771	783369	0	0
C5H5N5	0	C13-label-5	Adenine	S1-30	Adenine	{'C': ['P']}	-0.00786966	0	783369	0	0
C15H23N5O14P2	222481	PARENT	Adenosine diphosphate ribose	S1-30	Adenosine diphosphate ribose	{'C': ['P']}	263031	263031	283464	0.9279	0.9279
C15H23N5O14P2	39908.4	C13-label-1	Adenosine diphosphate ribose	S1-30	Adenosine diphosphate ribose	{'C': ['P']}	2863.98	2863.98	283464	0.0101	0.0101
C15H23N5O14P2	0	C13-label-10	Adenosine diphosphate ribose	S1-30	Adenosine diphosphate ribose	{'C': ['P']}	-0.000442351	0	283464	0	0
C15H23N5O14P2	0	C13-label-11	Adenosine diphosphate ribose	S1-30	Adenosine diphosphate ribose	{'C': ['P']}	4.0949e-06	4.0949e-06	283464	0	0
C15H23N5O14P2	0	C13-label-12	Adenosine diphosphate ribose	S1-30	Adenosine diphosphate ribose	{'C': ['P']}	-2.6e-08	0	283464	0	0
C15H23N5O14P2	5762.67	C13-label-2	Adenosine diphosphate ribose	S1-30	Adenosine diphosphate ribose	{'C': ['P']}	2814.69	2814.69	283464	0.0099	0.0099
C15H23N5O14P2	2291.8	C13-label-3	Adenosine diphosphate ribose	S1-30	Adenosine diphosphate ribose	{'C': ['P']}	2018.33	2018.33	283464	0.0071	0.0071
C15H23N5O14P2	2507.22	C13-label-4	Adenosine diphosphate ribose	S1-30	Adenosine diphosphate ribose	{'C': ['P']}	2531.99	2531.99	283464	0.0089	0.0089
C15H23N5O14P2	9367.72	C13-label-5	Adenosine diphosphate ribose	S1-30	Adenosine diphosphate ribose	{'C': ['P']}	10147.1	10147.1	283464	0.0358	0.0358
C15H23N5O14P2	0	C13-label-6	Adenosine diphosphate ribose	S1-30	Adenosine diphosphate ribose	{'C': ['P']}	-1144.13	0	283464	0	0
C15H23N5O14P2	0	C13-label-7	Adenosine diphosphate ribose	S1-30	Adenosine diphosphate ribose	{'C': ['P']}	57.451	57.451	283464	0.0002	0.0002
C15H23N5O14P2	0	C13-label-8	Adenosine diphosphate ribose	S1-30	Adenosine diphosphate ribose	{'C': ['P']}	-1.70507	0	283464	0	0
C15H23N5O14P2	0	C13-label-9	Adenosine diphosphate ribose	S1-30	Adenosine diphosphate ribose	{'C': ['P']}	0.033174	0.033174	283464	0	0
C6H10O4	312086	PARENT	Adipic acid	S1-30	Adipic acid	{'C': ['P']}	333703	333703	333703	1	1
C6H10O4	15726.3	C13-label-1	Adipic acid	S1-30	Adipic acid	{'C': ['P']}	-5595.68	0	333703	0	0
C6H10O4	0	C13-label-2	Adipic acid	S1-30	Adipic acid	{'C': ['P']}	-306.174	0	333703	0	0
C6H10O4	0	C13-label-5	Adipic acid	S1-30	Adipic acid	{'C': ['P']}	0.000924811	0.000924811	333703	0	0
C10H15N5O10P2	1.00554e+07	PARENT	ADP	S1-30	ADP	{'C': ['P']}	1.12428e+07	1.12428e+07	1.26704e+07	0.8873	0.8873
C10H15N5O10P2	1.34129e+06	C13-label-1	ADP	S1-30	ADP	{'C': ['P']}	235081	235081	1.26704e+07	0.0186	0.0186
C10H15N5O10P2	0	C13-label-10	ADP	S1-30	ADP	{'C': ['P']}	0.444644	0.444644	1.26704e+07	0	0
C10H15N5O10P2	328510	C13-label-2	ADP	S1-30	ADP	{'C': ['P']}	273374	273374	1.26704e+07	0.0216	0.0216
C10H15N5O10P2	284211	C13-label-3	ADP	S1-30	ADP	{'C': ['P']}	280145	280145	1.26704e+07	0.0221	0.0221
C10H15N5O10P2	142751	C13-label-4	ADP	S1-30	ADP	{'C': ['P']}	129866	129866	1.26704e+07	0.0102	0.0102
C10H15N5O10P2	418116	C13-label-5	ADP	S1-30	ADP	{'C': ['P']}	432719	432719	1.26704e+07	0.0342	0.0342
C10H15N5O10P2	88815.2	C13-label-6	ADP	S1-30	ADP	{'C': ['P']}	68600.9	68600.9	1.26704e+07	0.0054	0.0054
C10H15N5O10P2	7633.45	C13-label-7	ADP	S1-30	ADP	{'C': ['P']}	4310.66	4310.66	1.26704e+07	0.0003	0.0003
C10H15N5O10P2	3604.24	C13-label-8	ADP	S1-30	ADP	{'C': ['P']}	3485.4	3485.4	1.26704e+07	0.0003	0.0003
C10H15N5O10P2	0	C13-label-9	ADP	S1-30	ADP	{'C': ['P']}	-79.3775	0	1.26704e+07	0	0
C16H25N5O15P2	68763.9	PARENT	ADP-D-glucose	S1-30	ADP-D-glucose	{'C': ['P']}	82209.6	82209.6	101097	0.8132	0.8132
C16H25N5O15P2	11832.2	C13-label-1	ADP-D-glucose	S1-30	ADP-D-glucose	{'C': ['P']}	-611.678	0	101097	0	0
C16H25N5O15P2	0	C13-label-10	ADP-D-glucose	S1-30	ADP-D-glucose	{'C': ['P']}	0.0138976	0.0138976	101097	0	0
C16H25N5O15P2	0	C13-label-11	ADP-D-glucose	S1-30	ADP-D-glucose	{'C': ['P']}	-0.000185565	0	101097	0	0
C16H25N5O15P2	0	C13-label-12	ADP-D-glucose	S1-30	ADP-D-glucose	{'C': ['P']}	1.7194e-06	1.7194e-06	101097	0	0
C16H25N5O15P2	0	C13-label-13	ADP-D-glucose	S1-30	ADP-D-glucose	{'C': ['P']}	-1.09e-08	0	101097	0	0
C16H25N5O15P2	6828.46	C13-label-2	ADP-D-glucose	S1-30	ADP-D-glucose	{'C': ['P']}	6869.79	6869.79	101097	0.068	0.068
C16H25N5O15P2	5507.03	C13-label-3	ADP-D-glucose	S1-30	ADP-D-glucose	{'C': ['P']}	5244.41	5244.41	101097	0.0519	0.0519
C16H25N5O15P2	0	C13-label-4	ADP-D-glucose	S1-30	ADP-D-glucose	{'C': ['P']}	-835.684	0	101097	0	0
C16H25N5O15P2	2288.32	C13-label-5	ADP-D-glucose	S1-30	ADP-D-glucose	{'C': ['P']}	2644.7	2644.7	101097	0.0262	0.0262
C16H25N5O15P2	3955.57	C13-label-6	ADP-D-glucose	S1-30	ADP-D-glucose	{'C': ['P']}	4104.4	4104.4	101097	0.0406	0.0406
C16H25N5O15P2	0	C13-label-7	ADP-D-glucose	S1-30	ADP-D-glucose	{'C': ['P']}	-473.318	0	101097	0	0
C16H25N5O15P2	0	C13-label-8	ADP-D-glucose	S1-30	ADP-D-glucose	{'C': ['P']}	23.9362	23.9362	101097	0.0002	0.0002
C16H25N5O15P2	0	C13-label-9	ADP-D-glucose	S1-30	ADP-D-glucose	{'C': ['P']}	-0.71285	0	101097	0	0
C9H15N4O8P	0	PARENT	AICA ribonucleotide	S1-30	AICA ribonucleotide	{'C': ['P']}	0	0	0	0	0
C9H15N4O8P	0	C13-label-1	AICA ribonucleotide	S1-30	AICA ribonucleotide	{'C': ['P']}	0	0	0	0	0
C9H15N4O8P	0	C13-label-2	AICA ribonucleotide	S1-30	AICA ribonucleotide	{'C': ['P']}	0	0	0	0	0
C9H15N4O8P	0	C13-label-3	AICA ribonucleotide	S1-30	AICA ribonucleotide	{'C': ['P']}	0	0	0	0	0
C9H15N4O8P	0	C13-label-4	AICA ribonucleotide	S1-30	AICA ribonucleotide	{'C': ['P']}	0	0	0	0	0
C9H15N4O8P	0	C13-label-5	AICA ribonucleotide	S1-30	AICA ribonucleotide	{'C': ['P']}	0	0	0	0	0
C9H15N4O8P	0	C13-label-6	AICA ribonucleotide	S1-30	AICA ribonucleotide	{'C': ['P']}	0	0	0	0	0
C9H15N4O8P	0	C13-label-7	AICA ribonucleotide	S1-30	AICA ribonucleotide	{'C': ['P']}	0	0	0	0	0
C9H15N4O8P	0	C13-label-8	AICA ribonucleotide	S1-30	AICA ribonucleotide	{'C': ['P']}	0	0	0	0	0
C9H15N4O8P	0	C13-label-9	AICA ribonucleotide	S1-30	AICA ribonucleotide	{'C': ['P']}	0	0	0	0	0
C4H6N4O3	537705	PARENT	allantoin	S1-30	allantoin	{'C': ['P']}	562256	562256	562256	1	1
C4H6N4O3	21767.1	C13-label-1	allantoin	S1-30	allantoin	{'C': ['P']}	-2455.88	0	562256	0	0
C4H6N4O3	0	C13-label-2	allantoin	S1-30	allantoin	{'C': ['P']}	-333.873	0	562256	0	0
C10H14N5O7P	1.8781e+07	PARENT	AMP	S1-30	AMP	{'C': ['P']}	2.09988e+07	2.09988e+07	2.46661e+07	0.8513	0.8513
C10H14N5O7P	2.60233e+06	C13-label-1	AMP	S1-30	AMP	{'C': ['P']}	546476	546476	2.46661e+07	0.0222	0.0222
C10H14N5O7P	0	C13-label-10	AMP	S1-30	AMP	{'C': ['P']}	-10.8051	0	2.46661e+07	0	0
C10H14N5O7P	716352	C13-label-2	AMP	S1-30	AMP	{'C': ['P']}	612243	612243	2.46661e+07	0.0248	0.0248
C10H14N5O7P	784708	C13-label-3	AMP	S1-30	AMP	{'C': ['P']}	788242	788242	2.46661e+07	0.032	0.032
C10H14N5O7P	407270	C13-label-4	AMP	S1-30	AMP	{'C': ['P']}	371992	371992	2.46661e+07	0.0151	0.0151
C10H14N5O7P	1.0642e+06	C13-label-5	AMP	S1-30	AMP	{'C': ['P']}	1.09842e+06	1.09842e+06	2.46661e+07	0.0445	0.0445
C10H14N5O7P	279126	C13-label-6	AMP	S1-30	AMP	{'C': ['P']}	230183	230183	2.46661e+07	0.0093	0.0093
C10H14N5O7P	22707.1	C13-label-7	AMP	S1-30	AMP	{'C': ['P']}	11896.2	11896.2	2.46661e+07	0.0005	0.0005
C10H14N5O7P	7330.44	C13-label-8	AMP	S1-30	AMP	{'C': ['P']}	6914.51	6914.51	2.46661e+07	0.0003	0.0003
C10H14N5O7P	1042.43	C13-label-9	AMP	S1-30	AMP	{'C': ['P']}	894.889	894.889	2.46661e+07	0	0
C10H18N4O6	134511	PARENT	Arginosuccinic acid	S1-30	Arginosuccinic acid	{'C': ['P']}	150395	150395	259760	0.579	0.579
C10H18N4O6	76463.4	C13-label-1	Arginosuccinic acid	S1-30	Arginosuccinic acid	{'C': ['P']}	67850	67850	259760	0.2612	0.2612
C10H18N4O6	22874.6	C13-label-2	Arginosuccinic acid	S1-30	Arginosuccinic acid	{'C': ['P']}	17399.1	17399.1	259760	0.067	0.067
C10H18N4O6	23972.4	C13-label-3	Arginosuccinic acid	S1-30	Arginosuccinic acid	{'C': ['P']}	24050	24050	259760	0.0926	0.0926
C10H18N4O6	0	C13-label-4	Arginosuccinic acid	S1-30	Arginosuccinic acid	{'C': ['P']}	-1936.98	0	259760	0	0
C10H18N4O6	0	C13-label-5	Arginosuccinic acid	S1-30	Arginosuccinic acid	{'C': ['P']}	65.3071	65.3071	259760	0.0003	0.0003
C10H18N4O6	0	C13-label-6	Arginosuccinic acid	S1-30	Arginosuccinic acid	{'C': ['P']}	-1.2159	0	259760	0	0
C10H16N5O13P3	1.87499e+06	PARENT	ATP	S1-30	ATP	{'C': ['P']}	2.0964e+06	2.0964e+06	2.29214e+06	0.9146	0.9146
C10H16N5O13P3	195999	C13-label-1	ATP	S1-30	ATP	{'C': ['P']}	-15989.2	0	2.29214e+06	0	0
C10H16N5O13P3	0	C13-label-10	ATP	S1-30	ATP	{'C': ['P']}	0.000214422	0.000214422	2.29214e+06	0	0
C10H16N5O13P3	55471.7	C13-label-2	ATP	S1-30	ATP	{'C': ['P']}	50627	50627	2.29214e+06	0.0221	0.0221
C10H16N5O13P3	45411.5	C13-label-3	ATP	S1-30	ATP	{'C': ['P']}	44333.2	44333.2	2.29214e+06	0.0193	0.0193
[truncated: 3,503 more rows]

## Sheet: Raw Data > Column Title Details
Column Title	Explanation of Column Title
Formula	chemical formula of the metabolite
Intensity	peak intensity (abundance count number)
Label	how many heavy isotopes labels are attached to the metabolite
Name	metabolite name
Sample	sample number
Unlabeled Fragment	metabolite name to which each isotopologue belongs
Indistinguishale_isotope	a study setting in Polly to define isotopes that cannot be resolved by the mass spectrometer used for the study. For example, resolution of roughly 60K resolving power (FWHM) is needed to baseline resolve between 15N and 13C isotopes.
NA Corrected	The peak area for each isotopologue after correcting for natural abundance istopes
NA Corrected with zero	Often natural abundance correction can result is slightly negative values for low-abundance isotopoluges. Here these negative values are replaced with a zero.
Pool_total	The sum of the peak area for all isotopologues within a compound, giving the total relative pool size of each metabolite.
Fractional Enrichment	The fractional amount of each isotopologue within a metabolite pool.
Fractional Enrichment with zero	The fractional amount of each isotopologue within a metabolite pool after negative NA corrected values have been replaced with 'zero'

## Sheet: T cells total 13C-enrichment
Sample	Treatment	?-Nicotinamide mononucleotide	1-methylhistidine	2'-Deoxycytidine	2-Aminoadipic acid	2-Hydroxybutyric acid	2-Methylglutaric acid	2-oxoglutarate	3-Hydroxy-3-methylglutaric acid	3-Hydroxybutyric acid	3-Methyl-L-histidine	3-Phosphoglyceric acid	3-Ureidopropionic acid	4-hydroxy-proline	4-Hydroxybutyric acid (GHB)	5'-S-Methyl-5'-thioadenosine	5-phosphoribosyl-1-pyrophosphate	acetyl-CoA	Acetyl-L-carnitine	Acetylcholine	Adenine	Adenosine diphosphate ribose	Adipic acid	ADP	ADP-D-glucose	AICA ribonucleotide	allantoin	AMP	Arginosuccinic acid	ATP	Betaine	biotin	Carnosine	CDP	CDP-choline	CDP-ethanolamine	Choline	citric acid	CMP	Coenzyme A	Creatine	Creatinine	cyclic-AMP	Cystathionine	Cytidine	D-(-)-Fructose	D-(+)-Glucose	D-(+)-Xylose	D-a-Hydroxyglutaric acid
S1-00	Phen	0.2526	0	0	0.0035	0.1111	0.0114	0.3061	0.1612	0.0003	0	0.0956	0	0	0.0844	0.0874	0	0.2021	0.1781	0	0.0366	0.116	0.0114	0.1978	0.3297	0.2848	0	0.21	0.3294	0.1811	0.0034	0.1655	0.0001	0.0275	0.0086	0.0109	0.0052	0.3554	0.0155	0.0527	0.002	0.0006	0.2815	0	0.0002	0.0008	0.0166	0	0.0182
S1-01	Phen	0	0.019	0.0288	0	0.1787	0.0371	0.3493	0.1953	0	0	0.0661	0	0	0.0964	0.1533	0.1269	0.1881	0.2178	0	0.0784	0.1573	0.0371	0.2174	0.3975	0.8065	0	0.2368	0.391	0.1905	0.0051	0.108	0.0001	0.0594	0.0191	0.041	0.0045	0.4925	0.0565	0.0253	0.0014	0.0013	0.3356	0	0.0002	0	0.0124	0	0.0461
S1-30	Phen	0.3056	0.0194	0	0	0.1269	0	0.304	0.1946	0	0	0.0461	0	0.0019	0.0447	0.0272	0.0012	0.0889	0.2064	0	0.0101	0.0721	0	0.1127	0.1868	1	0	0.1487	0.421	0.0854	0.0013	0.0908	0.0001	0.016	0.0175	0.0137	0.0037	0.3563	0.0033	0.0109	0.0013	0	0.1645	0	0.0044	0	0.0176	0	0.0329
S2-03	PBS	0.4177	0	0.0131	0	0.0298	0.0018	0.397	0.121	0	0	0.0391	0	0	0.0202	0.3231	0.1101	0.2061	0.1629	0.0019	0.1202	0.3514	0.0018	0.4303	0.6803	0.9624	0	0.4299	0.3468	0.3901	0.0016	0.1376	0.0601	0.24	0.155	0.2038	0.0079	0.3691	0.2615	0.1877	0.0027	0	0.3576	0	0.1305	0	0.0242	0	0.1487
S2-10	PBS	0.3569	0	0.0276	0	0.0475	0.0011	0.3668	0.0901	0	0.0022	0.0641	0	0	0	0.2078	0.3228	0.1972	0.1576	0	0.1513	0.2533	0.0011	0.3511	0.4488	0.9164	0	0.3399	0.3368	0.3221	0	0.2032	0.0215	0.2506	0.176	0.207	0.0043	0.3807	0.2908	0.045	0.0023	0	0.3561	0	0.0006	0	0.01	0	0.1497
S2-30	PBS	0	0	0	0	0.0402	0	0.4259	0.2433	0	0	0.0251	0	0.0062	0.0839	0.3777	0.0974	0.3108	0.1996	0.0015	0.2452	0.3468	0.0018	0.469	0.6306	0.772	0.0005	0.4784	0.388	0.4484	0.0021	0.2006	0.0924	0.3087	0.2288	0.2808	0.0062	0.3825	0.3286	0.1955	0.003	0	0.3593	0.029	0.0967	0.0011	0.0104	0	0.2235
		0.186067	0.0128	0.0096	0.00116667	0.1389	0.0161667	0.3198	0.1837	0.0001	0	0.0692667	0	0.000633333	0.0751667	0.0893	0.0427	0.1597	0.200767	0	0.0417	0.115133	0.0161667	0.175967	0.304667	0.6971	0	0.1985	0.380467	0.152333	0.00326667	0.121433	0.0001	0.0343	0.0150667	0.0218667	0.00446667	0.4014	0.0251	0.0296333	0.00156667	0.000633333	0.260533	0	0.0016	0.000266667	0.0155333	0	0.0324
		0.2582	0	0.0135667	0	0.0391667	0.000966667	0.396567	0.151467	0	0.000733333	0.0427667	0	0.00206667	0.0347	0.302867	0.176767	0.238033	0.173367	0.00113333	0.172233	0.317167	0.00156667	0.4168	0.586567	0.8836	0.000166667	0.416067	0.3572	0.386867	0.00123333	0.180467	0.058	0.266433	0.1866	0.230533	0.00613333	0.377433	0.293633	0.142733	0.00266667	0	0.357667	0.00966667	0.0759333	0.000366667	0.0148667	0	0.173967
		PASS	FAIL	FAIL	FAIL	PASS	FAIL	PASS	PASS	FAIL	FAIL	PASS	FAIL	FAIL	PASS	PASS	PASS	PASS	PASS	FAIL	PASS	PASS	FAIL	PASS	PASS	PASS	FAIL	PASS	PASS	PASS	FAIL	PASS	PASS	PASS	PASS	PASS	FAIL	PASS	PASS	PASS	FAIL	FAIL	PASS	FAIL	PASS	FAIL	FAIL	FAIL	PASS
[truncated: 110 more columns]

## Sheet: Subset >5% enrichment
Sample	Treatment	?-Nicotinamide mononucleotide	1-methylhistidine	2'-Deoxycytidine	2-Aminoadipic acid	2-Hydroxybutyric acid	2-Methylglutaric acid	2-oxoglutarate	3-Hydroxy-3-methylglutaric acid	3-Hydroxybutyric acid	3-Methyl-L-histidine	3-Phosphoglyceric acid	3-Ureidopropionic acid	4-hydroxy-proline	4-Hydroxybutyric acid (GHB)	5'-S-Methyl-5'-thioadenosine	5-phosphoribosyl-1-pyrophosphate	acetyl-CoA	Acetyl-L-carnitine	Acetylcholine	Adenine	Adenosine diphosphate ribose	Adipic acid	ADP	ADP-D-glucose	AICA ribonucleotide	allantoin	AMP	Arginosuccinic acid	ATP	Betaine	biotin	Carnosine	CDP	CDP-choline	CDP-ethanolamine	Choline	citric acid	CMP	Coenzyme A	Creatine	Creatinine	cyclic-AMP	Cystathionine	Cytidine	D-(-)-Fructose	D-(+)-Glucose	D-(+)-Xylose	D-a-Hydroxyglutaric acid
S1-00	Phen	0.2526	NA	NA	NA	0.1111	NA	0.3061	0.1612	NA	NA	0.0956	NA	NA	0.0844	0.0874	0	0.2021	0.1781	NA	0.0366	0.116	NA	0.1978	0.3297	0.2848	NA	0.21	0.3294	0.1811	NA	0.1655	0.0001	0.0275	0.0086	0.0109	NA	0.3554	0.0155	0.0527	NA	NA	0.2815	NA	0.0002	NA	NA	NA	0.0182
S1-01	Phen	0	NA	NA	NA	0.1787	NA	0.3493	0.1953	NA	NA	0.0661	NA	NA	0.0964	0.1533	0.1269	0.1881	0.2178	NA	0.0784	0.1573	NA	0.2174	0.3975	0.8065	NA	0.2368	0.391	0.1905	NA	0.108	0.0001	0.0594	0.0191	0.041	NA	0.4925	0.0565	0.0253	NA	NA	0.3356	NA	0.0002	NA	NA	NA	0.0461
S1-30	Phen	0.3056	NA	NA	NA	0.1269	NA	0.304	0.1946	NA	NA	0.0461	NA	NA	0.0447	0.0272	0.0012	0.0889	0.2064	NA	0.0101	0.0721	NA	0.1127	0.1868	1	NA	0.1487	0.421	0.0854	NA	0.0908	0.0001	0.016	0.0175	0.0137	NA	0.3563	0.0033	0.0109	NA	NA	0.1645	NA	0.0044	NA	NA	NA	0.0329
S2-03	PBS	0.4177	NA	NA	NA	0.0298	NA	0.397	0.121	NA	NA	0.0391	NA	NA	0.0202	0.3231	0.1101	0.2061	0.1629	NA	0.1202	0.3514	NA	0.4303	0.6803	0.9624	NA	0.4299	0.3468	0.3901	NA	0.1376	0.0601	0.24	0.155	0.2038	NA	0.3691	0.2615	0.1877	NA	NA	0.3576	NA	0.1305	NA	NA	NA	0.1487
S2-10	PBS	0.3569	NA	NA	NA	0.0475	NA	0.3668	0.0901	NA	NA	0.0641	NA	NA	0	0.2078	0.3228	0.1972	0.1576	NA	0.1513	0.2533	NA	0.3511	0.4488	0.9164	NA	0.3399	0.3368	0.3221	NA	0.2032	0.0215	0.2506	0.176	0.207	NA	0.3807	0.2908	0.045	NA	NA	0.3561	NA	0.0006	NA	NA	NA	0.1497
S2-30	PBS	0	NA	NA	NA	0.0402	NA	0.4259	0.2433	NA	NA	0.0251	NA	NA	0.0839	0.3777	0.0974	0.3108	0.1996	NA	0.2452	0.3468	NA	0.469	0.6306	0.772	NA	0.4784	0.388	0.4484	NA	0.2006	0.0924	0.3087	0.2288	0.2808	NA	0.3825	0.3286	0.1955	NA	NA	0.3593	NA	0.0967	NA	NA	NA	0.2235
[truncated: 110 more columns]
